# Supplementary material for: Real-world validation of the minimal disease activity index in psoriatic arthritis: an analysis from a prospective, observational, biological treatment registry
Source: PubMed Central journal article supplement — BMJ Open. 2017 Aug 30;7(8):e016619. doi: 10.1136/bmjopen-2017-016619 (PMC5629663; doi:10.1136/bmjopen-2017-016619), 2017-08-30
Supplement: bmjopen-2017-016619.draft_revisions.pdf [file bmjopen-2017-016619.draft_revisions.pdf]

# BMJ Open

BMJ Open is committed to open peer review. As part of this commitment we make the peer review history of every article we publish publicly available.

When an article is published we post the peer reviewers' comments and the authors' responses online. We also post the versions of the paper that were used during peer review. These are the versions that the peer review comments apply to.

The versions of the paper that follow are the versions that were submitted during the peer review process. They are not the versions of record or the final published versions. They should not be cited or distributed as the published version of this manuscript.

BMJ Open is an open access journal and the full, final, typeset and author-corrected version of record of the manuscript is available on our site with no access controls, subscription charges or pay-per-view fees (<http://bmjopen.bmj.com>).

If you have any questions on BMJ Open's open peer review process please email [info.bmjopen@bmj.com](mailto:info.bmjopen@bmj.com)

# BMJ Open

## Real World Validation of the Minimal Disease Activity Index in Psoriatic Arthritis: An Analysis from a Prospective, Observational, Biological Treatment Registry

|                                    |                                                                                                                                                                                                                                                                                                                                                                                                                                                                                                                                                                                                                                                                                                                                                                   |
|------------------------------------|-------------------------------------------------------------------------------------------------------------------------------------------------------------------------------------------------------------------------------------------------------------------------------------------------------------------------------------------------------------------------------------------------------------------------------------------------------------------------------------------------------------------------------------------------------------------------------------------------------------------------------------------------------------------------------------------------------------------------------------------------------------------|
| Journal:                           | <i>BMJ Open</i>                                                                                                                                                                                                                                                                                                                                                                                                                                                                                                                                                                                                                                                                                                                                                   |
| Manuscript ID                      | bmjopen-2017-016619                                                                                                                                                                                                                                                                                                                                                                                                                                                                                                                                                                                                                                                                                                                                               |
| Article Type:                      | Research                                                                                                                                                                                                                                                                                                                                                                                                                                                                                                                                                                                                                                                                                                                                                          |
| Date Submitted by the Author:      | 24-Feb-2017                                                                                                                                                                                                                                                                                                                                                                                                                                                                                                                                                                                                                                                                                                                                                       |
| Complete List of Authors:          | Rahman, Proton; Memorial University of Newfoundland, Medicine<br>Zummer, Michel; Hôpital Maisonneuve-Rosemont<br>Bessette, Louis; Centre de Recherche du CHU de Québec<br>Baer, Philip; Private practice<br>Haraoui, Boulos; Centre Hospitalier de l'Université de Montréal<br>Chow, Andrew; Credit Valley Rheumatology,<br>Kelsall, John; Saint Paul's Hospital<br>Kapur, Suneil; University of Ottawa<br>Rampakakis, Emmanouil; JSS Medical Research Inc., Scientific Affairs<br>Psaradellis, Eliofotisti; JSS Medical Research Inc., Scientific Affairs<br>Lehman, Allen; Janssen Inc., Medical Affairs<br>Nantel, Francois; Janssen Inc., Medical Affairs<br>Osborne, Brendan; Janssen Inc., Medical Affairs<br>Tkaczyk, Cathy; Janssen Inc., Medical Affairs |
| <b>Primary Subject<br>Heading</b>: | Rheumatology                                                                                                                                                                                                                                                                                                                                                                                                                                                                                                                                                                                                                                                                                                                                                      |
| Secondary Subject Heading:         | Epidemiology, Evidence based practice, Rheumatology                                                                                                                                                                                                                                                                                                                                                                                                                                                                                                                                                                                                                                                                                                               |
| Keywords:                          | RHEUMATOLOGY, Clinical trials < THERAPEUTICS, EPIDEMIOLOGY,<br>PRIMARY CARE, STATISTICS & RESEARCH METHODS                                                                                                                                                                                                                                                                                                                                                                                                                                                                                                                                                                                                                                                        |
|                                    |                                                                                                                                                                                                                                                                                                                                                                                                                                                                                                                                                                                                                                                                                                                                                                   |

SCHOLARONE™  
Manuscripts

1  
2  
3 **Real World Validation of the Minimal Disease Activity Index in Psoriatic Arthritis: An**  
4  
5 **Analysis from a Prospective, Observational, Biological Treatment Registry**  
6  
7  
8

9  
10 **Corresponding Author:**

11 Full name: Proton Rahman

12 Postal address: Memorial University of Newfoundland, 230 Elizabeth Avenue, St. John's, NF  
13 A1B 3X9, Canada  
14

15 E-mail: [prahman@mun.ca](mailto:prahman@mun.ca)  
16  
17

18  
19  
20  
21 **Authors:**

22 Rahman P: Associate Dean, Clinical Research, Memorial University of Newfoundland, 230  
23 Elizabeth Avenue, Saint John's, NF, A1B 3X9, Canada

24 Zimmer M: Head of Rheumatology, Hôpital Maisonneuve-Rosemont, 5415 Boulevard de  
25 l'Assomption, Montréal, QC, H1T 2M4, Canada

26 Bessette L: Rheumatologist, Centre de Recherche du CHU de Québec, 2325 rue de l'Université,  
27 Québec, QC, G1V 0A6, Canada

28 Baer P: Rheumatologist, Private Practice, 1333 Neilson Rd, Scarborough, ON, M1B 4Y9,  
29 Canada

30 Haraoui B: Rheumatologist, Centre Hospitalier de l'Université de Montréal, 1000 Rue Saint-  
31 Denis, Montréal, QC, H2X 3J4, Canada

32 Chow A: Rheumatologist, Credit Valley Rheumatology, 2000 Credit Valley Rd, Mississauga,  
33 ON, L5M 4N4, Canada

34 Kelsall J: Clinical Associate Professor, Saint Paul's Hospital, 1081 Burrard St, Vancouver, BC,  
35 V6Z 1Y6, Canada

36 Kapur S: Rheumatologist, University of Ottawa, 75 Laurier Ave E, Ottawa, ON, K1N 6N5,  
37 Canada

38 Rampakakis E: Vice President of Scientific Affairs, JSS Medical Research Inc., 9400 Henri-  
39 Bourassa O, St-Laurent, QC, H4S 1N8, Canada

40 Psaradellis E: Scientific Advisor, JSS Medical Research Inc., 9400 Henri-Bourassa O, St-  
41 Laurent, QC, H4S 1N8, Canada  
42  
43  
44  
45  
46  
47  
48  
49  
50  
51  
52  
53  
54  
55  
56  
57  
58  
59  
60

1  
2  
3 Lehman AJ: Medical & Scientific Liaison – Rheumatology, Western Canada, Janssen Inc., 19  
4 Green Belt Dr, Toronto, ON, M3C 1L9, Canada

5  
6  
7 Nantel F: Director, Medical Affairs – Rheumatology, Janssen Inc., 19 Green Belt Dr, Toronto,  
8 ON, M3C 1L9, Canada

9  
10 Osborne B: Medical and Scientific Liaison – Rheumatology, Janssen Inc., 19 Green Belt Dr,  
11 Toronto, ON, M3C 1L9, Canada

12  
13 Tkaczyk C: Medical and Scientific Liaison – Medical Affairs, Janssen Inc., 19 Green Belt Dr,  
14 Toronto, ON, M3C 1L9, Canada  
15  
16

17  
18  
19  
20  
21 Word count (excluding title page, abstract, references, figures and tables): 2,605 words  
22  
23  
24  
25  
26  
27  
28  
29  
30  
31  
32  
33  
34  
35  
36  
37  
38  
39  
40  
41  
42  
43  
44  
45  
46  
47  
48  
49  
50  
51  
52  
53  
54  
55  
56  
57  
58  
59  
60

1  
2  
3 **Key words:** Psoriatic arthritis, minimal disease activity, registry, real world, infliximab,  
4 golimumab  
5  
6  
7  
8  
9

### 10 **Structured Abstract**

11 **Objectives:** To describe the minimal disease activity (MDA) rate over time in psoriatic arthritis  
12 (PsA) patients receiving anti-TNF agents, evaluate prognostic factors of MDA achievement, and  
13 identify the most common unmet criteria among MDA achievers.  
14  
15  
16  
17

18 **Design:** Biologic Treatment Registry Across Canada (BioTRAC): ongoing, prospective registry  
19 of patients initiating treatment for rheumatoid arthritis, ankylosing spondylitis, or PsA with  
20 Infliximab (IFX), Golimumab (GLM) or ustekinumab.  
21  
22  
23  
24  
25  
26

27 **Setting:** 46 primary-care Canadian rheumatology practices.  
28

29 **Participants:** 223 PsA patients receiving IFX (enrolled since 2005) and GLM (enrolled since  
30 2010) with available MDA information at baseline, 6 months, and/or 12 months.  
31  
32  
33

34 **Primary and secondary outcome measures:** MDA was defined as  $\geq 5$  of the following criteria:  
35 Tender Joint Count (TJC)-28  $\leq 1$ , Swollen Joint Count (SJC)-28  $\leq 1$ , Psoriasis Area Severity  
36 Index (PASI)  $\leq 1$ , or Body Surface Area  $\leq 3$ , Pain (VAS)  $\leq 15$ mm, Patient's global assessment  
37 (PtGA) (VAS)  $\leq 20$ mm, HAQ  $\leq 0.5$ , tender enthesal points  $\leq 1$ . Independent prognostic factors of  
38 MDA achievement were assessed with multivariate logistic regression.  
39  
40  
41  
42  
43  
44

45 **Results:** MDA was achieved by 11.7% of patients at baseline, 43.5% at 6 months, 44.8% at 12  
46 months, and 48.8% at either 6 or 12 months. Among MDA achievers at 6 months, 75.7%  
47 sustained MDA at 12 months. Lower baseline HAQ (OR=0.210; 95% CI: 0.099-0.447) and  
48 lower TJC28 (OR=0.880; 95% CI: 0.804-0.964), were significant prognostic factors of MDA  
49 achievement over 12 months of treatment. The most commonly unmet MDA criteria among  
50 MDA achievers was patient reported pain (25%), PtGA (15%) and PASI (12%).  
51  
52  
53  
54  
55  
56  
57  
58  
59  
60

1  
2  
3 **Conclusions:** Almost 50% of patients treated with IFX or GLM in routine clinical care achieve  
4 MDA within the first year of treatment. Lower baseline HAQ and lower TJC28, were identified  
5 as significant prognostic factors of MDA achievement. The most commonly unmet criteria in  
6 patients who achieved MDA were pain, PtGA and PASI.  
7  
8  
9

10  
11  
12 **Trial Registration:** NCT00741793, “Biologic Treatment Registry Across Canada (BioTRAC)”  
13  
14

15  
16  
17 **Strengths and limitations of this study:**  
18

- 19 • The limitations in the current study are that the peripheral joint activity was measured  
20 using the 28 tender/swollen joint count although the Outcome Measures in Rheumatology  
21 Clinical Trials (OMERACT) recommends the measure of 68 tender/66 swollen joint  
22 counts.  
23
- 24 • Furthermore, although several approaches were used to assess disease activity,  
25 radiographic images are not collected in BioTRAC, therefore not allowing the  
26 examination of radiographic progression.  
27
- 28 • There is also potential bias given the observational nature of the study, a bias that is  
29 avoided when using data from clinical trials.  
30
- 31 • The strength of the study is that patients were seen in a real world setting by Canadian  
32 rheumatologists during routine clinical practice which enhances the generalizability of  
33 the results to the target population.  
34  
35  
36  
37  
38  
39  
40  
41  
42  
43  
44  
45  
46  
47  
48  
49  
50  
51  
52  
53  
54  
55  
56  
57  
58  
59  
60

## INTRODUCTION

Psoriatic arthritis (PsA) is a chronic systemic inflammatory musculoskeletal disease characterized by synovitis, axial disease, enthesitis, or dactylitis, and psoriasis. It is variably associated with other extra-articular manifestations that affects women and men equally.[1] PsA also affects up to 30 to 40% of patients with psoriasis.[2] Previously PsA was considered a mild disease; however, evidence from the last two decades has shown that it is frequently an erosive and deforming in 40 to 60% of patients who are diagnosed within the first few years.[3-5] Furthermore, similarly to other rheumatic diseases such as rheumatoid arthritis (RA), PsA has been associated with impaired physical function, reduced quality of life, and increased mortality,[6-8] with about 20% of patients eventually developing a highly destructive and disabling form of PsA.[9] Manifestations of PsA contribute to disease burden due to the negative effects on the patient's psychological and psychosocial functioning, dissatisfaction with the management of the disease and the negative impact on daily living activities.[10]

Over the years, major clinical improvements have been achieved in the outcome of inflammatory rheumatic diseases due to improved treatment availability and more commonly adopted early treatment algorithms including the treat to target strategy which has become the standard of care for newly diagnosed patients in RA.[11,12] Treatment therapies in PsA such as tumor necrosis factor  $\alpha$  blockers (anti TNF  $\alpha$ ), have demonstrated a reduction in disease activity and radiographic progression of joint damage.[13-15] Although remission remains the ultimate treatment goal, the complexity of PsA makes it difficult to identify valid criteria that mark a state of remission or low disease activity that take into account all dimensions of the clinical manifestations of the disease. In the past decades, different scores were used to evaluate the disease severity of PsA such as the Disease Activity Score using 28 joints (DAS28) originally developed for RA assessment, as well as the Psoriatic Arthritis Disease Activity Score

1  
2  
3 (PASDAS), a weighted index comprising assessments of joints, function, acute-phase response,  
4 quality of life (QOL), and patient and physician global VAS scores, and the Composite Psoriatic  
5 Disease Activity Index (CPDAI) which takes into account the assessment of different domains  
6 such as peripheral arthritis, skin disease, spinal disease, dactylitis, and enthesitis. The minimal  
7 disease activity (MDA) was developed to take into account the heterogeneity seen and measure  
8 the disease activity of several clinical domains which is a more suitable outcome measure  
9 compared to DAS28 which does not take into consideration the full spectrum of disease  
10 manifestations.[16] These MDA criteria were validated in randomized controlled trials and  
11 observational studies demonstrating that patients who achieved MDA for a period of 12 months  
12 or more experienced a reduction in radiographic joint damage progression.[17,18] The tight  
13 control of inflammation in early psoriatic arthritis (TICOPA) trial was the first randomised,  
14 controlled trial, with a treat to target approach in PsA patients where the tight control group were  
15 reviewed every 4 weeks with escalation of treatment if MDA criteria wasn't met. Patients in the  
16 tight control group showed significant improvements in joint and skin disease activity, as well as  
17 benefits in function and QOL compared to the standard of care group.[19] However as far as we  
18 know, no real world evidence data on MDA are available in the literature.

19  
20  
21  
22  
23  
24  
25  
26  
27  
28  
29  
30  
31  
32  
33  
34  
35  
36  
37  
38  
39  
40  
41 The aim of the current study is to 1) describe the rate of MDA achievement over time, 2)  
42 evaluate prognostic factors of MDA achievement, 3) assess which unmet criteria were more  
43 common among patients who achieved MDA, 4) evaluate which unmet criteria were more  
44 common among patients who were near MDA achievers, and 5) assess DAS28 remission,  
45 DAS28 deep remission, and the level of agreement between MDA and DAS28 remission in PsA  
46 patients treated with infliximab or golimumab, in a routine clinical practice setting. The analysis  
47 was done using data from the Biologic Treatment Registry Across Canada (BioTRAC), an  
48  
49  
50  
51  
52  
53  
54  
55  
56  
57  
58  
59  
60



1  
2  
3 ongoing, community based, Canada-wide, multi-centre, prospective, observational registry of  
4  
5 patients with inflammatory arthritis.  
6  
7  
8  
9

## 11 **METHODS**

### 13 **Study design**

15 BioTRAC is an ongoing Canadian multi-centre, prospective, observational registry collecting  
16  
17 real world clinical, laboratory, patient-centric, and safety data in rheumatoid arthritis, ankylosing  
18  
19 spondylitis, and psoriatic arthritis patients treated with infliximab (IFX), golimumab (GLM), or  
20  
21 ustekinumab as part of their routine care. The historical development of the registry has been  
22  
23 described by Thorne et al.[20] To date there are over 100 rheumatology sites, participating, both  
24  
25 in an institutional and private setting, with over 2100 patients enrolled in the programme across  
26  
27 all indications. In accordance with the observational nature of the registry, there is no protocol-  
28  
29 defined intervention in patient management. All clinical decisions and treatments are based on  
30  
31 routine practice and the judgement of the treating physicians. Patients provided written informed  
32  
33 consent prior to participation in the study. Ethics approval for participation in the BioTRAC  
34  
35 program was obtained from the respective Research Ethics Boards (REB) of participating  
36  
37 institutional sites and a Central Institutional Review Board (IRB Services, Ontario Canada) for  
38  
39 private practice sites. BioTRAC is conducted according to the tenets of the Declaration of  
40  
41 Helsinki.  
42  
43  
44  
45  
46  
47

### 48 **Study population**

50 Biologic-naïve patients or patients previously treated with one biologic who are eligible for  
51  
52 treatment with infliximab, golimumab, or ustekinumab as per their respective Canadian Product  
53  
54 Monograph are considered for inclusion in the registry. For the purpose of the current analysis,  
55  
56 223 patients with PsA treated with infliximab (enrolled since 2005) or with golimumab (enrolled  
57  
58  
59  
60

1  
2  
3 since 2010) were included from 46 primary care rheumatology practices across Canada. All  
4 efficacy analyses were observed and included all enrolled PsA patients who received at least one  
5  
6 dose of IFX or GLM, and had at least one follow up assessment with available MDA data at 6 or  
7  
8  
9  
10  
11 12 months. Figure 1 represents the flow chart of the patient population over time.

### 12 13 **Data collection**

14 The following clinical/laboratory parameters and patient reported outcomes (PROs) are collected  
15  
16 as per routine care at baseline and at all follow up visits, with suggested assessments every six  
17  
18 months given that this is within acceptable practice patterns for patients with active PsA:  
19  
20 morning (AM) stiffness, swollen joint count (SJC28), tender joint count (TJC28), patient's  
21  
22 (PtGA), and physician's (MDGA) global assessment of disease activity, health assessment  
23  
24 questionnaire (HAQ), patient's assessment of pain, C-reactive protein (CRP), and erythrocyte  
25  
26 sedimentation rate (ESR).  
27  
28  
29  
30

### 31 32 **Statistical Analysis**

33 Descriptive statistics included mean and standard deviations for continuous variables, and  
34  
35 proportions for categorical variables. The absolute improvement in disease parameters at 6 and  
36  
37 12 months of treatment was assessed with the non-parametric Wilcoxon Signed Ranks test, while  
38  
39 between group differences for continuous and categorical variables were assessed with the non-  
40  
41 parametric Kruskal-Wallis test and the Pearson Chi-square test, respectively. The improvement  
42  
43 in MDA achievement, DAS28 remission (<2.6), and DAS28 deep remission (<1.98) over time  
44  
45 was assessed for statistical significance with the McNemar test. Independent prognostic factors  
46  
47 of MDA achievement at 6 or 12 months of treatment were assessed with backward conditional  
48  
49 logistic regression; covariates considered were: province, gender, age, baseline biologic agent,  
50  
51 MDGA, PtGA, pain, HAQ, SJC28, TJC28, and enthesitis count with probability for stepwise  
52  
53 entry and removal at the 0.05 and 0.10 level, respectively. MDA was defined as the fulfillment of  
54  
55  
56  
57  
58  
59  
60

1  
2  
3  $\geq 5$  of the following criteria: TJC28 $\leq 1$ , SJC28 $\leq 1$ , PASI $\leq 1$ , pain (VAS)  $\leq 15$  mm, PtGA (VAS)  
4  $\leq 20$  mm, HAQ $\leq 0.5$ , tender enthesal points  $\leq 1$ .<sup>[18]</sup> Near MDA was defined as fulfillment of 4/7  
5  
6 criteria. Patients with missing information included gender (n=21), age (n=89), disease duration  
7  
8 (n=76), while baseline parameters for DAS28 (n=49), MDGA (n=31), CRP (n=51), ESR (n=48),  
9  
10 AM stiffness (n=34), and TJC28, SJC28, PtGA, HAQ, pain, PASI (all, n=27). Furthermore 12%,  
11  
12 30%, and 38% of patients had missing MDA at baseline, 6 and 12-month follow-up, respectively  
13  
14 (see Figure 1). There was no imputation of missing data in the current analysis. Statistical  
15  
16 analyses were conducted with SPSS 21.0 (SPSS Inc., Chicago, IL).  
17  
18  
19  
20  
21  
22

## 23 RESULTS

24  
25 Table 1 summarizes the patient demographics and characteristics by region at baseline. There  
26  
27 were 130 (58.3%) and 93 (41.7%) patients on GLM and IFX, respectively. Mean (SD) age and  
28  
29 disease duration was 49.8 (11.1) and 5.4 (6.3) years, respectively, and 50% were males. Baseline  
30  
31 disease parameters for DAS28, TJC, SJC, pain, PtGA, MDGA, morning stiffness, HAQ, CRP,  
32  
33 and ESR were statistically comparable at baseline among Canadian regions. However significant  
34  
35 differences between regional groups were observed at baseline for mean (SD) disease duration  
36  
37 (p=0.002), enthesitis count [Western: 6.8 (3.3), Ontario: 4.6 (4.2), Quebec: 3.4 (2.1), Maritime:  
38  
39 5.8 (3.6); p=0.012], and PASI [Western: 3.8 (4.2), Ontario: 3.7 (5.4), Quebec: 1.4 (2.9),  
40  
41 Maritime: 1.2 (1.5); p<0.001]. Furthermore, use of a previous biologic (p=0.017), previous  
42  
43 DMARD (p=0.047), and previous corticosteroid (p=0.006) showed significant between group  
44  
45 differences among regions (Table 1).  
46  
47  
48  
49  
50  
51  
52  
53  
54  
55  
56  
57  
58  
59  
60

Table 1. Demographics and disease characteristics by region at baseline

| Parameter                            | Western<br>(N=18) | Ontario<br>(N=111) | Quebec<br>(N=63) | Maritimes<br>(N=31) | p-value | Total<br>(N=223) |
|--------------------------------------|-------------------|--------------------|------------------|---------------------|---------|------------------|
| <b>Socio-demographics</b>            |                   |                    |                  |                     |         |                  |
| Gender, n (%) <sup>a</sup>           |                   |                    |                  |                     |         |                  |
| Male                                 | 5 (38.5)          | 44 (43.1)          | 35 (58.3)        | 17 (63.0)           | 0.107   | 101 (50.0)       |
| Female                               | 8 (61.5)          | 58 (56.9)          | 25 (41.7)        | 10 (37.0)           |         | 101 (50.0)       |
| Age (years), mean (SD)               | 50.7 (14.6)       | 49.7 (10.7)        | 51.0 (11.6)      | 46.5 (9.9)          | 0.393   | 49.8 (11.1)      |
| <b>Disease Parameters, mean (SD)</b> |                   |                    |                  |                     |         |                  |
| Disease duration (years)             | 4.0 (4.6)         | 5.4 (6.2)          | 7.5 (7.4)        | 1.9 (2.0)           | 0.002   | 5.4 (6.3)        |
| DAS28                                | 4.3 (0.8)         | 4.4 (1.7)          | 4.2 (1.3)        | 4.3 (1.8)           | 0.928   | 4.3 (1.6)        |
| TJC28                                | 8.1 (6.4)         | 7.1 (6.7)          | 5.8 (5.0)        | 9.0 (9.2)           | 0.555   | 7.0 (6.7)        |
| SJC28                                | 4.1 (3.8)         | 4.6 (4.7)          | 5.2 (4.1)        | 5.0 (5.1)           | 0.549   | 4.8 (4.5)        |
| MDGA (VAS cm)                        | 6.0 (2.1)         | 5.1 (2.4)          | 5.5 (2.3)        | 4.6 (1.4)           | 0.062   | 5.2 (2.2)        |
| PtGA (VAS mm)                        | 54.5 (27.1)       | 52.0 (28.3)        | 49.5 (22.2)      | 46.0 (25.6)         | 0.662   | 50.5 (26.1)      |
| AM stiffness <sup>b</sup> (min)      | 54.6 (49.2)       | 48.1 (47.6)        | 35.5 (39.8)      | 49.1 (43.3)         | 0.237   | 45.0 (45.0)      |
| HAQ                                  | 1.3 (0.5)         | 1.1 (0.7)          | 1.1 (0.6)        | 1.0 (0.7)           | 0.263   | 1.1 (0.7)        |
| Pain (VAS mm)                        | 47.9 (23.0)       | 49.2 (27.5)        | 48.4 (23.0)      | 40.7 (23.6)         | 0.492   | 47.6 (25.4)      |
| PASI                                 | 3.8 (4.2)         | 3.7 (5.4)          | 1.4 (2.9)        | 1.2 (1.5)           | <0.001  | 2.6 (4.4)        |
| Enthesitis count <sup>c</sup>        | 6.8 (3.3)         | 4.6 (4.2)          | 3.4 (2.1)        | 5.8 (3.6)           | 0.012   | 4.9 (3.5)        |
| ESR (mm/h)                           | 14.0 (15.3)       | 22.5 (22.9)        | 19.4 (16.4)      | 19.0 (22.3)         | 0.566   | 20.7 (20.7)      |
| CRP (mg/L)                           | 12.4 (13.6)       | 17.7 (36.9)        | 10.7 (14.2)      | 14.1 (27.6)         | 0.952   | 14.7 (29.1)      |
| <b>Medications, n (%)</b>            |                   |                    |                  |                     |         |                  |
| <b>Baseline Biologic Agent</b>       |                   |                    |                  |                     |         |                  |
| GLM                                  | 8 (44.4)          | 69 (62.2)          | 39 (61.9)        | 14 (45.2)           | 0.200   | 130 (58.3)       |
| IFX                                  | 10 (55.6)         | 42 (37.8)          | 24 (38.1)        | 17 (54.8)           |         | 93 (41.7)        |
| Previous biologic                    | 3 (21.4)          | 5 (5.3)            | 10 (17.2)        | 7 (24.1)            | 0.017   | 25 (12.8)        |
| Previous DMARD                       | 12 (85.7)         | 59 (62.1)          | 47 (81.0)        | 21 (72.4)           | 0.047   | 139 (70.9)       |
| Previous corticosteroid              | 6 (42.9)          | 17 (17.9)          | 21 (36.2)        | 3 (10.3)            | 0.006   | 47 (24.0)        |
| Concomitant DMARD                    | 11 (78.6)         | 52 (54.7)          | 40 (69.0)        | 19 (65.5)           | 0.164   | 122 (62.2)       |
| Concomitant Methotrexate             | 4 (28.6)          | 43 (45.3)          | 35 (60.3)        | 16 (55.2)           | 0.102   | 98 (50.0)        |
| Concomitant corticosteroid use       | 1 (7.1)           | 10 (10.5)          | 7 (12.1)         | 2 (6.9)             | 0.868   | 20 (10.2)        |

<sup>a</sup>Percentages based on available data

<sup>b</sup>Capped at 120 minutes.

<sup>c</sup>Among patients with enthesitis.

DAS28, Disease Activity Score; HAQ, Health assessment questionnaire; MDGA, Physician Global Assessment of Disease Activity; PASI, Psoriasis Area and Severity Index; PtGA, Patient Global Assessment of Disease Activity; SJC, Swollen joint count; TJC, Tender joint count; GLM, golimumab; IFX, infliximab.

All disease parameters showed statistically significant improvement over time from baseline to month 6 and month 12 ( $p < 0.05$ ) (supplementary material).

Figure 2 describes MDA achievement, DAS28 remission, and DAS28 deep remission over time.

At baseline, 6, and 12 months of treatment, 11.7%, 43.5%, and 44.8% of patients achieved MDA, respectively, while 48.8% achieved MDA at 6 or 12 months. Additionally, 34.6% ( $n=28/81$ ) achieved MDA at both 6 and 12 months of treatment (overall sustained MDA).

DAS28 remission ( $< 2.6$ ), was achieved by 14.4%, 50.0%, and 48.8% of patients, and DAS28 deep remission ( $< 1.98$ ), by 8.6%, 33.9%, and 28.6%, at baseline, 6, and 12 months of treatment, respectively (Figure 2). The improvement in MDA achievement, DAS28 remission, and DAS28 deep remission from baseline to 6 months and 12 months was statistically significant for all measures of disease activity ( $p < 0.05$ ). Table 2 depicts sensitivity, specificity, positive and negative predictive values between MDA and DAS28 remission as well as DAS28 deep remission. There was substantial agreement between MDA and DAS28 remission with a Kappa measure of agreement of 0.653 ( $p < 0.001$ ) while that between MDA and DAS28 deep remission showed moderate agreement with 0.598 ( $p < 0.001$ ).

**Table 2. Agreement between MDA and DAS28**

| Diagnostic Criteria Definitions | DAS28 Remission ( $< 2.6$ ) | DAS28 Deep Remission ( $< 1.98$ ) |
|---------------------------------|-----------------------------|-----------------------------------|
|                                 |                             |                                   |

|                                  |       |       |
|----------------------------------|-------|-------|
| <b>Sensitivity</b>               | 70.7% | 82.1% |
| <b>Specificity</b>               | 92.3% | 85.7% |
| <b>Positive Predictive Value</b> | 82.1% | 60.4% |
| <b>Negative Predictive Value</b> | 86.4% | 94.7% |
| <b>Kappa agreement (K)</b>       | 0.653 | 0.598 |

Univariate analysis (Table 3A) showed that male gender ( $p=0.031$ ) and lower age ( $p=0.011$ ) were significantly associated with MDA achievement at 6 or 12 months of treatment. Furthermore, significant between-region differences were observed for MDA achievement at 6 or 12 months of treatment ( $p=0.019$ ). Ontario and Quebec patients had the highest MDA rates with 56.0% and 52.9%, respectively, while 36.4% and 14.3% of patients in Maritime and Western provinces reached MDA, respectively. In addition, significantly lower disease severity was observed at baseline among MDA achievers for the following disease parameters: MDGA ( $p<0.001$ ), PtGA ( $p<0.001$ ), pain ( $p<0.001$ ), HAQ ( $p<0.001$ ), SJC28 ( $p=0.001$ ), TJC28 ( $p<0.001$ ), and enthesitis count ( $p=0.013$ ). Multivariate logistic regression analysis (Table 3B) showed that lower baseline HAQ ( $OR=0.210$ ,  $p<0.001$ ) and lower TJC28 ( $OR=0.880$ ,  $p=0.006$ ) were significant prognostic factors of MDA achievement over 12 months of treatment, while parameters of lower enthesitis count ( $OR=0.838$ ,  $p=0.069$ ) and GLM as the biologic agent ( $OR=2.228$ ,  $p=0.073$ ) showed a trend towards statistical significance.

**Table 3A. Univariate Analysis for MDA Achievement at 6 or 12 Months of Treatment**

| Parameters      | MDA achievement at 6 or 12 months |    | p-value <sup>c</sup> |
|-----------------|-----------------------------------|----|----------------------|
|                 | Yes                               | No |                      |
| Province, n (%) |                                   |    |                      |

|    |                                                  |             |             |        |
|----|--------------------------------------------------|-------------|-------------|--------|
| 1  |                                                  |             |             |        |
| 2  |                                                  |             |             |        |
| 3  |                                                  |             |             |        |
| 4  | <i>Western</i>                                   | 2 (14.3)    | 12 (85.7)   | 0.019  |
| 5  | <i>Ontario</i>                                   | 42 (56.0)   | 33 (44.0)   |        |
| 6  | <i>Quebec</i>                                    | 27 (52.9)   | 24 (47.1)   |        |
| 7  | <i>Maritimes</i>                                 | 8 (36.4)    | 14 (63.6)   |        |
| 8  |                                                  |             |             |        |
| 9  |                                                  |             |             |        |
| 10 | <b>Gender, n (%)</b>                             |             |             |        |
| 11 | <i>Male</i>                                      | 45 (59.2)   | 31 (40.8)   | 0.031  |
| 12 | <i>Female</i>                                    | 28 (40.6)   | 41 (59.4)   |        |
| 13 |                                                  |             |             |        |
| 14 | <b>Age, mean (SD)</b>                            | 46.6 (12.0) | 51.6 (10.7) | 0.011  |
| 15 | <b>MDGA (VAS cm)<sup>a</sup>, mean (SD)</b>      | 4.3 (2.4)   | 5.9 (2.0)   | <0.001 |
| 16 | <b>PtGA (VAS mm)<sup>a</sup>, mean (SD)</b>      | 39.7 (24.7) | 56.8 (24.9) | <0.001 |
| 17 | <b>Pain (VAS mm)<sup>a</sup>, mean (SD)</b>      | 35.6 (24.4) | 55.1 (23.2) | <0.001 |
| 18 | <b>HAQ<sup>a</sup>, mean (SD)</b>                | 0.7 (0.6)   | 1.3 (0.6)   | <0.001 |
| 19 | <b>SJC28<sup>a</sup>, mean (SD)</b>              | 3.4 (3.8)   | 5.4 (4.4)   | 0.001  |
| 20 | <b>TJC28<sup>a</sup>, mean (SD)</b>              | 3.8 (4.1)   | 8.8 (6.8)   | <0.001 |
| 21 | <b>Enthesitis count<sup>a,b</sup>, mean (SD)</b> | 0.7 (1.4)   | 2.0 (3.3)   | 0.013  |
| 22 |                                                  |             |             |        |
| 23 | <b>Baseline biologic agent</b>                   |             |             |        |
| 24 | GLM                                              | 48 (53.9)   | 41 (46.1)   | 0.158  |
| 25 | IFX                                              | 31 (42.5)   | 42 (57.5)   |        |

<sup>a</sup>Denotes disease parameters at baseline.

<sup>b</sup>Among all patients (with and without enthesitis).

<sup>c</sup>P-value was assessed with chi-square for categorical variables or with non-parametric Mann-Whitney U test for continuous variables.

**Table 3B. Multivariate Analysis for MDA Achievement at 6 or 12 Months of Treatment**

| Parameters                           | Beta   | Odds Ratio | 95% Confidence Intervals |       | p-value |
|--------------------------------------|--------|------------|--------------------------|-------|---------|
|                                      |        |            | for Odds Ratio           |       |         |
|                                      |        |            | Lower                    | Upper |         |
| Baseline HAQ                         | -1.561 | 0.210      | 0.099                    | 0.447 | <0.001  |
| Baseline TJC28                       | -0.128 | 0.880      | 0.804                    | 0.964 | 0.006   |
| Baseline enthesitis count            | -0.177 | 0.838      | 0.692                    | 1.014 | 0.069   |
| Baseline biologic agent: GLM vs. IFX | 0.801  | 2.228      | 0.929                    | 5.343 | 0.073   |

Multivariate analysis was assessed with backward conditional logistic regression, covariates entered were: province, gender, age, baseline biologic agent, MDGA, PtGA, Pain, HAQ, SJC28, TJC28, and enthesitis count with probability for stepwise entry and removal at the 0.05 and 0.10 level, respectively.

1  
2  
3 Among the patients who achieved MDA at any time point, the highest proportion met all 7 MDA  
4 criteria with 45.8%, while 24.4% met 6 /7 criteria, and 29.8% met 5/7 criteria (Figure 3A). The  
5 most commonly unmet criteria among these cases were patient-reported pain (with 25.2%),  
6 PtGA (with 15.3%), and PASI (with 12.2%) (Figure 3B). Additionally, among the 309 instances  
7 of non-MDA achievement, the proportion of cases that achieved near MDA was 16.5% (51/309).  
8 The most common reason for non-MDA in near-MDA cases was patient-reported pain (82.4%)  
9 followed by PtGA (68.6%), and HAQ (60.8%) (Figure 3C). Interestingly, 9 patients with  
10 available data that had reached MDA at 6 months were not in MDA state after 12 months. It was  
11 determined that the most common criteria not met in this group were: PtGA (88.9%), enthesitis  
12 count (66.7%), TJC (55.6%), and PASI (33.3%).  
13  
14  
15  
16  
17  
18  
19  
20  
21  
22  
23  
24  
25  
26  
27  
28  
29

## 30 DISCUSSION

31  
32 The current analysis is the first community-based Canadian study presenting a 12 month follow  
33 up of 223 prospectively followed patients with PsA from the BioTRAC registry. All measures of  
34 disease activity in the current study showed a statistical improvement over time ( $p < 0.05$ ).  
35  
36  
37  
38  
39

40 Reported MDA achievement at 6 and 12 months of treatment was comparable with 43.5% and  
41 44.8%, respectively. Among MDA achievers at 6 months, 75.7% ( $n=28/37$ ) had sustained MDA  
42 at 12 months. The MDA achievement rate of approximately 45% is in line with the rates  
43 reported by Mease et al. despite the randomized controlled setting of this study.[21] However,  
44 our findings are lower in comparison with two recent studies which reported that 64% of the  
45 study population achieved MDA after 12 months of treatment with anti TNF  $\alpha$  therapy [22,23].  
46  
47 In the current real world setting study, a slightly higher proportion of patients (48.8%) achieved  
48 DAS28 remission at 12 months in comparison to MDA achievement. However, the MDA had  
49  
50  
51  
52  
53  
54  
55  
56  
57  
58  
59  
60



1  
2  
3 substantial and moderate agreement with DAS28 and DAS28 deep remission, respectively. Thus  
4  
5 the current analysis revealed that MDA criteria are a more powerful and discriminatory method  
6  
7 to assess PsA than DAS28. The simplicity in calculating MDA and the lack of requirement for  
8  
9 acute phase reactants at the time of visit as compared to the DAS28, makes the MDA a more  
10  
11 desirable and practical tool to measure disease outcome in PsA.  
12  
13

14  
15 Adjusted analysis of baseline variables showed that lower HAQ, lower TJC28, lower enthesitis  
16  
17 count, and GLM as the biologic agent were considered independent prognostic factors of MDA  
18  
19 achievement over 12 months of treatment. In addition to HAQ [24,25], previous studies have  
20  
21 also identified shorter symptom duration, greater general well-being (global visual analogue  
22  
23 scale) [24], younger age, higher C-reactive protein (CRP), and lower BASFI as significant  
24  
25 predictors of MDA, which however, were not confirmed in our study.[26] Moreover, other  
26  
27 studies have shown that baseline lower HAQ, higher swollen joint count, and no previous use of  
28  
29 anti TNF  $\alpha$  therapy are also prognostic factors of remission at 12 months of treatment.[27,28]  
30  
31

32  
33 The current results also showed that the most common limiting factors among patients who  
34  
35 achieved MDA were including pain, PtGA, and PASI. Among patients who achieved near-MDA,  
36  
37 the most commonly unmet criteria were pain, PtGA, and HAQ. These results highlight the  
38  
39 difference in perception of disease activity by physicians and patients in the relative importance  
40  
41 placed on specific disease aspects.  
42  
43  
44  
45

46  
47 All disease parameters showed a statistically significant improvement at 6 months of treatment  
48  
49 and were sustained over the 12-month period. In a prospective cohort study by Saber *et al.*,  
50  
51 statistically significant improvements in clinical outcome measures were also observed for  
52  
53 TJC28, SJC28, CRP, and HAQ at 12 months in patients treated with anti TNF  $\alpha$  therapy  
54  
55  
56  
57  
58  
59  
60

1  
2  
3 (p<0.001 for all), wherein statistical improvement was achieved within the first 3 months of  
4  
5  
6 treatment.[27]  
7

8  
9 The limitations of the current study are that the peripheral joint activity was measured using the  
10  
11 28 tender/swollen joint count although the Outcome Measures in Rheumatology Clinical Trials  
12  
13 (OMERACT) recommends the measure of 68 tender/66 swollen joint counts.[16] However,  
14  
15 simplified joint counts have been shown to be sufficiently sensitive to measure clinical response  
16  
17 in PsA patients.[29] Furthermore, although several approaches were used to assess disease  
18  
19 activity, radiographic images are not collected in BioTRAC, therefore not allowing the  
20  
21 examination of radiographic progression. There is also potential bias given the observational  
22  
23 nature of the study, a bias that is avoided when using data from clinical trials. The strength of the  
24  
25 study is that patients were seen in a real world setting by Canadian rheumatologists during  
26  
27 routine clinical practice which enhances the generalizability of the results to the target  
28  
29 population.  
30  
31  
32  
33  
34

35 In conclusion, our results showed overall improvement in clinical parameters and disease activity  
36  
37 in PsA patients treated with infliximab or golimumab during the 2 year follow up. By 6 and 12  
38  
39 months of treatment almost 50% of patients achieved MDA, and among achievers of MDA the  
40  
41 most commonly unmet criteria were patient-reported pain, PtGA, and PASI. Furthermore, lower  
42  
43 baseline HAQ and lower TJC at baseline, were identified as significant prognostic factors of  
44  
45 MDA achievement. This study provides evidence supporting the validity of MDA in real world  
46  
47 and its usefulness in patient management under routine clinical care.  
48  
49  
50  
51  
52  
53  
54  
55  
56  
57  
58  
59  
60

**FIGURE LEGENDS**

Figure 2. MDA Achievement, DAS28 Remission and DAS28 Deep Remission over Time

■ Baseline   ■ 6 months   ■ 12 months

Figure 3A. Proportion of Met Criteria among MDA Achievers

■ 5/7 Criteria  
■ 6/7 Criteria  
■ 7/7 Criteria

Peer review only

1  
2  
3  
4  
5  
6  
7  
8  
9  
10  
11  
12  
13  
14  
15  
16  
17  
18  
19  
20  
21  
22  
23  
24  
25  
26  
27  
28  
29  
30  
31  
32  
33  
34  
35  
36  
37  
38  
39  
40  
41  
42  
43  
44  
45  
46  
47  
48  
49  
50  
51  
52  
53  
54  
55  
56  
57  
58  
59  
60

1  
2  
3 **Acknowledgments:** Not applicable  
4  
5  
6

7 **Competing interests:**

8  
9 Dr. Rahman reports personal fees from Janssen Inc., during the conduct of the study; personal  
10 fees from Abbott, AbbVie, Amgen, BMS, Celgene, Novartis, Pfizer, Roche, outside the  
11 submitted work. Dr. Zummer, Dr. Chow and Dr. Kapur report personal fees from Janssen Inc.,  
12 during the conduct of the study. Dr. Bessette reports personal fees from Janssen Inc., during the  
13 conduct of the study; personal fees from Amgen, BMS, Roche, UCB, AbbVie, Pfizer, Merck,  
14 Sanofi, Celgene, Lilly, Novartis, outside the submitted work. Dr. Baer reports personal fees from  
15 Janssen Inc., during the conduct of the study; personal fees from AbbVie, Amgen, BMS, Pfizer,  
16 Roche, outside the submitted work. Dr. Haraoui reports personal fees from Janssen Inc., during  
17 the conduct of the study; personal fees from AbbVie, Amgen, BMS, Celgene, Pfizer, Roche,  
18 UCB, outside the submitted work. Dr. Kelsall reports personal fees from Janssen Inc., during the  
19 conduct of the study; personal fees from Abbott, AstraZeneca, BMS, Merck-Schering, Lilly,  
20 Pfizer, Wyeth, Roche, Takeda, UCB, outside the submitted work. Dr. Rampakakis and Ms.  
21 Psaradellis report personal fees from Janssen Inc. as employees of JSS Medical Research Inc.,  
22 the CRO hired, during the conduct of the study. Dr. Lehman, Dr. Nantel, Dr. Osborne and Dr.  
23 Tkaczyk report personal fees as employees of Janssen Inc., during the conduct of the study.  
24  
25  
26  
27  
28  
29  
30  
31  
32  
33  
34  
35  
36

37 **Funding:** This work was supported by Janssen Inc.  
38  
39  
40

41 **Contributorship statement:**

42 Dr. Rahman, Dr. Zummer, Dr. Bessette, Dr. Baer, Dr. Haraoui, Dr. Chow, Dr. Kelsall and Dr.  
43 Kapur substantially contributed to the acquisition of the data for the work and revised the  
44 manuscript for important intellectual property. Dr. Rampakakis, Dr. Lehman, Dr. Nantel, Dr.  
45 Osborne and Dr. Tkaczyk substantially contributed to the conception or design of the work and  
46 the interpretation of the data for the work, and revised the manuscript critically for important  
47 intellectual content. Ms. Psaradellis substantially contributed to the analysis and interpretation of  
48 data for the work and drafted the manuscript. All authors approved the version to be published  
49 and agreed to be accountable for all aspects of the work in ensuring that questions related to the  
50 accuracy or integrity of any part of the work were appropriately investigated and resolved.  
51  
52  
53  
54  
55  
56  
57  
58  
59  
60

1  
2  
3  
4  
5 **Role of study sponsor:** The sponsor, Janssen Inc., participated in the study design and  
6 interpretation of the data and funded all aspects of the study, but did not have an impact on data  
7 collection or the decision to submit the article for publication. The writing was conducted by a  
8 third party and the sponsor critically reviewed the manuscript.  
9  
10  
11

12  
13  
14 **Independence:** The study researchers were independent from funders.  
15  
16

17  
18 **Access to data:** All authors, external and internal, had full access to all of the data (including  
19 statistical reports and tables) in the study and can take responsibility for the integrity of the data  
20 and the accuracy of the data analysis.  
21  
22  
23

24 **Transparency declaration:** The lead author affirms that the manuscript is an honest, accurate,  
25 and transparent account of the study being reported; no important aspects of the study have been  
26 omitted; any discrepancies from the study as planned have been explained.  
27  
28  
29

30  
31 **Data sharing:** No additional data available.  
32  
33

34  
35 **Checklist:** The criteria described in the STROBE guidelines (checklist) have been satisfied.  
36  
37

38  
39 **What this paper adds:**

40 **What is already known on this subject:**

- 41 • The control of disease activity adopting the treat-to-target strategy or minimal disease  
42 activity (MDA) has not been carefully established and is becoming the current challenge  
43 in management of PSA.  
44
- 45 • As far as we know, there is no real-world evidence data on MDA available in the  
46 literature and our study will address this need.  
47  
48  
49  
50  
51

52  
53 **What this study adds:**

- 54 • The results of the current study showed that almost 50% of patients achieved MDA  
55 within the first year of treatment and thus provides evidence supporting the validity of  
56  
57  
58  
59  
60

1  
2  
3 MDA in Canadian real-world and its usefulness in patient management under routine  
4 clinical care.  
5  
6  
7  
8  
9  
10  
11  
12  
13  
14  
15  
16  
17  
18  
19  
20  
21  
22  
23  
24  
25  
26  
27  
28  
29  
30  
31  
32  
33  
34  
35  
36  
37  
38  
39  
40  
41  
42  
43  
44  
45  
46  
47  
48  
49  
50  
51  
52  
53  
54  
55  
56  
57  
58  
59  
60

For peer review only

## REFERENCE LIST

## References

- 1 Sonoda KH, Inaba S, Ariyama A, et al. Therapeutic neutrophil apheresis in patients with ocular Behcet disease. *Arch Ophthalmol* 2005;123(2):267-269.
- 2 Khraishi M, Chouela E, Bejar M, et al. High prevalence of psoriatic arthritis in a cohort of patients with psoriasis seen in a dermatology practice. *J Cutan Med Surg* 2012;16(2):122-127.
- 3 Kane D, Stafford L, Bresnihan B, et al. A prospective, clinical and radiological study of early psoriatic arthritis: an early synovitis clinic experience. *Rheumatology (Oxford)* 2003;42(12):1460-1468.
- 4 McHugh NJ, Balachrishnan C, Jones SM. Progression of peripheral joint disease in psoriatic arthritis: a 5-yr prospective study. *Rheumatology (Oxford)* 2003;42(6):778-783.
- 5 Gladman DD, Stafford-Brady F, Chang CH, et al. Longitudinal study of clinical and radiological progression in psoriatic arthritis. *J Rheumatol* 1990;17(6):809-812.
- 6 Wong K, Gladman DD, Husted J, et al. Mortality studies in psoriatic arthritis: results from a single outpatient clinic. I. Causes and risk of death. *Arthritis Rheum* 1997;40(10):1868-1872.
- 7 Husted JA, Gladman DD, Farewell VT, et al. Health-related quality of life of patients with psoriatic arthritis: a comparison with patients with rheumatoid arthritis. *Arthritis Rheum* 2001;45(2):151-158.
- 8 Husted JA, Tom BD, Farewell VT, et al. A longitudinal study of the effect of disease activity and clinical damage on physical function over the course of psoriatic arthritis: Does the effect change over time? *Arthritis Rheum* 2007;56(3):840-849.
- 9 Gladman DD, Antoni C, Mease P, et al. Psoriatic arthritis: epidemiology, clinical features, course, and outcome. *Ann Rheum Dis* 2005;64 Suppl 2:ii14-17.
- 10 Yu AP, Tang J, Xie J, et al. Economic burden of psoriasis compared to the general population and stratified by disease severity. *Curr Med Res Opin* 2009;25(10):2429-2438.
- 11 Schoels M, Knevel R, Aletaha D, et al. Evidence for treating rheumatoid arthritis to target: results of a systematic literature search. *Ann Rheum Dis* 2010;69(4):638-643.
- 12 National Institute for Health and Clinical Excellence. The management of rheumatoid arthritis in adults. 2009. <http://www.nice.org.uk/guidance/cg79> (accessed 28 Mar 2016).
- 13 Gladman DD, Mease PJ, Ritchlin CT, et al. Adalimumab for long-term treatment of psoriatic arthritis: forty-eight week data from the adalimumab effectiveness in psoriatic arthritis trial. *Arthritis Rheum* 2007;56(2):476-488.
- 14 Mease PJ, Kivitz AJ, Burch FX, et al. Etanercept treatment of psoriatic arthritis: safety, efficacy, and effect on disease progression. *Arthritis Rheum* 2004;50(7):2264-2272.
- 15 van der Heijde D, Kavanaugh A, Gladman DD, et al. Infliximab inhibits progression of radiographic damage in patients with active psoriatic arthritis through one year of treatment: Results from the induction and maintenance psoriatic arthritis clinical trial 2. *Arthritis Rheum* 2007;56(8):2698-2707.
- 16 Coates LC, Fransen J, Helliwell PS. Defining minimal disease activity in psoriatic arthritis: a proposed objective target for treatment. *Ann Rheum Dis* 2010;69(1):48-53.
- 17 Coates LC, Cook R, Lee KA, et al. Frequency, predictors, and prognosis of sustained minimal disease activity in an observational psoriatic arthritis cohort. *Arthritis Care Res (Hoboken)* 2010;62(7):970-976.

- 1  
2  
3  
4  
5  
6  
7  
8  
9  
10  
11  
12  
13  
14  
15  
16  
17  
18  
19  
20  
21  
22  
23  
24  
25  
26  
27  
28  
29  
30  
31  
32  
33  
34  
35  
36  
37  
38  
39  
40  
41  
42  
43  
44  
45  
46  
47  
48  
49  
50  
51  
52  
53  
54  
55  
56  
57  
58  
59  
60
- 18 Coates LC, Helliwell PS. Validation of minimal disease activity criteria for psoriatic arthritis using interventional trial data. *Arthritis Care Res (Hoboken)* 2010;62(7):965-969.
- 19 Coates LC, Moverley AR, McParland L, et al. Effect of tight control of inflammation in early psoriatic arthritis (TICOPA): a UK multicentre, open-label, randomised controlled trial. *Lancet* 2015;386(10012):2489-2498.
- 20 Thorne C, Bensen WG, Choquette D, et al. Effectiveness and safety of infliximab in rheumatoid arthritis: analysis from a canadian multicenter prospective observational registry. *Arthritis Care Res (Hoboken)* 2014;66(8):1142-1151.
- 21 Mease PJ, Heckaman M, Kary S, et al. Application and modifications of minimal disease activity measures for patients with psoriatic arthritis treated with adalimumab: subanalyses of ADEPT. *J Rheumatol* 2013;40(5):647-652.
- 22 Haddad A, Thavaneswaran A, Ruiz-Arruza I, et al. Minimal disease activity and anti-tumor necrosis factor therapy in psoriatic arthritis. *Arthritis Care Res (Hoboken)* 2015;67(6):842-847.
- 23 Lubrano E, Perrotta FM, Parsons WJ, et al. Patient's Global Assessment as an Outcome Measure for Psoriatic Arthritis in Clinical Practice: A Surrogate for Measuring Low Disease Activity? *J Rheumatol* 2015.
- 24 Theander E, Husmark T, Alenius GM, et al. Early psoriatic arthritis: short symptom duration, male gender and preserved physical functioning at presentation predict favourable outcome at 5-year follow-up. Results from the Swedish Early Psoriatic Arthritis Register (SwePsA). *Ann Rheum Dis* 2014;73(2):407-413.
- 25 Kavanaugh A, van der Heijde D, Beutler A, et al. Patients with psoriatic arthritis who achieve minimal disease activity in response to golimumab therapy demonstrate less radiographic progression: Results through 5 years of the randomized, placebo-controlled, GO-REVEAL study. *Arthritis Care Res (Hoboken)* 2015.
- 26 Iervolino S, Di Minno MN, Peluso R, et al. Predictors of early minimal disease activity in patients with psoriatic arthritis treated with tumor necrosis factor-alpha blockers. *J Rheumatol* 2012;39(3):568-573.
- 27 Saber TP, Ng CT, Renard G, et al. Remission in psoriatic arthritis: is it possible and how can it be predicted? *Arthritis Res Ther* 2010;12(3):R94.
- 28 Eder L, Chandran V, Schentag CT, et al. Time and predictors of response to tumour necrosis factor-alpha blockers in psoriatic arthritis: an analysis of a longitudinal observational cohort. *Rheumatology (Oxford)* 2010;49(7):1361-1366.
- 29 Englbrecht M, Wang Y, Ronneberger M, et al. Measuring joint involvement in polyarticular psoriatic arthritis: an introduction of alternatives. *Arthritis Care Res (Hoboken)* 2010;62(7):977-983.



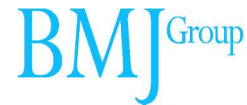

## BMJ

### Licence to BMJ Publishing Group Limited (“BMJ Group”) for Publication

To be agreed to by the corresponding author or guarantor on behalf of all authors ("Corresponding Author"). All authors collectively are referred to as the “Contributors”

In consideration of the BMJ Group (“the Publishers”) considering to publish the article contained within the original manuscript which includes without limitation any diagrams, photographs, other illustrative material, video, film or any other material howsoever submitted by the Contributor(s) at any time and related to the Contribution (“the Contribution”) in the BMJ (“the Journal”), certain rights are required to be granted by each different category of author(s), which are as follows:

1. For employees of the **UK Crown acting in the course of their employment**- a non exclusive Licence, as set out below. All provisions of this document apply. The non exclusivity relates to the original submitted manuscript video, films, images, photographs, diagrams and/or illustrative material only.
2. For employees of the **US Federal Government employees acting in the course of their employment**, no copyright exists and the Contribution is in the public domain so no licence is required to be granted. The Author Warranties below apply (excluding 1.iii).
3. For all other authors, an exclusive Licence, as set out below. All provisions of this document apply.

**NB** where a Contribution is a multi authored work, each author’s element of the Contribution will be dealt with in accordance with 1, 2 or 3 above, as applicable.

#### The Licence

The Licence granted in accordance with 1 or 3 above is:

A worldwide, licence, to the Publishers and its licensees in perpetuity (subject to the Reversion of Rights set out below), in all forms, formats and media (whether known now or created in the future), **to** i) publish, reproduce, distribute, display and store the Contribution, ii) translate the Contribution into other languages, create adaptations, reprints, include within collections and create summaries, extracts and/or, abstracts of the Contribution and convert or allow conversion into any format including without limitation audio, iii) create any other derivative work(s) based in whole or part on the Contribution, iv) to exploit all subsidiary rights that currently exist or as may exist in the future in the Contribution, v) the inclusion of electronic links from the Contribution to third party material wherever it may be located; and, vi) licence any third party to do any or all of the above.

If you and/or any co-author’s employer owns the copyright to your contribution you must obtain in writing the relevant employers’ consent to grant the licence and agree to all obligations herein. The author(s) hereby agree that in the event that the BMJ Group sell, the whole or part of its journal business to any third party, the benefit and the burden of the Licence contained herein shall be assigned to that third party.

#### Additional Rights and Obligations

The author(s) (and their employers as applicable), hereby authorise the Publishers to take such steps as they consider necessary at their own expense in the copyright owners name and on their behalf, if they believe that a third party is infringing or is likely to infringe copyright or the rights granted to the Publishers herein in the Contribution without further recourse to the copyright owner(s).

For Original Research articles and Open Access Funded Articles (as both defined below), the Publishers expressly agree to place the published Contribution for display on PubMed Central (including its international mirror sites) promptly without charge to the authors or their employers (provided Pubmed Central does not charge the Publishers), which will include any Publishers’ supplied amendments or retractions.

1  
2  
3  
4  
5 “**Original Research**” means an article reporting a research study, with a research structured abstract and normally  
6 appearing in the Research section of the BMJ. “**Open Access Funded Articles**” means articles funded in whole or  
7 part by a research grant from a government and/or charitable organisation(s) that requires open access deposit in  
8 PubMed Central. Such articles are identified by the reference to a Creative Commons licence.  
9  
10

11 The author(s) acknowledge and accept that BMJ Group may make additional changes to the contribution as  
12 considered necessary in accordance with standard editorial processes whether before or after publication. The  
13 Corresponding Author will usually see proofs for their Contributions and every effort will be made to consult with  
14 the Corresponding Author if substantial alterations are made. The BMJ Group may also retract or publish a  
15 correction or other notice when it considers this appropriate for legal or editorial reasons and this shall be at its  
16 absolute discretion which shall be exercised reasonably.  
17  
18  
19  
20  
21

### 22 **Reversion of Rights**

23 If the Contribution is not published in either the print or electronic versions of the Journal or any other Publisher(s)  
24 products, within 12 months of final acceptance by the BMJ Group, (or as otherwise agreed), any Licence granted  
25 herein shall automatically terminate and all rights shall revert to the copyright owner. The Publishers may keep a  
26 copy of the Contribution as a record (including via any contractor).  
27

### 28 **Rights Granted to Owners of the Contribution**

29 Ownership of copyright remains with the author(s) or their employers. All rights not expressly granted are, subject  
30 to the Licence terms, reserved by the Publishers. In return for the grant of the Licence herein, the copyright owner(s)  
31 shall have the following rights for **non-Commercial Use (unless otherwise stated)** of the Contribution:

- 32 1. The right to reproduce a reasonable number (no more than 100) print copies of the final Contribution, by copying  
33 or downloading from the BMJ Group website, for personal use and to send copies to colleagues in print or electronic  
34 form provided no fee is charged and this is not done on a systematic basis ( which includes via mass e-mailings).  
35
- 36 2. The right to include the Contribution in a compilation for classroom use (course packs) to be distributed free of  
37 charge (other than for direct photocopying cost) to students at the Contributor(s)’s institution or to be stored in  
38 digital format in data rooms for access by students as part of their course work and for in house training  
39 programmes of the Contributor(s)’s employer or at seminars or conferences subject to a limit of 100 copies per  
40 conference or seminar.  
41  
42
- 43 3. For all articles (excluding articles commissioned by the Publishers), the right to post a version of the final  
44 published version of the Contribution, or any abstract of the final published Contribution on the Contributor(s)’s  
45 own and/or his/her institution’s website after the Publisher’s publication.  
46  
47  
48
- 49 4. For all Publisher commissioned articles, the right to post a version of the final published version of the  
50 Contribution, or any abstract of the final published Contribution on the Contributor(s)’s own and/or his/her  
51 institution’s website 12 months after publication.  
52  
53  
54  
55  
56  
57  
58  
59  
60

1  
2  
3 5. The following statement must accompany the articles posted on the Contributor(s)'s and/or his/her institution's  
4 website:

5  
6  
7 "This article has been published in the BMJ [insert full citation reference] and can also be viewed on the journal's  
8 website at [www.bmj.com](http://www.bmj.com)"  
9

10  
11 6. In addition, for Original Research articles and Open Access Funded Articles copyright owners (and the  
12 Publishers) may and may allow third parties to use the Contribution in accordance one of the following Creative  
13 Commons licences depending on the source of the research funding as per below:

14  
15 a) where the Original Research article and/or Open Access Funded Articles **is not** funded by the Wellcome Trust or  
16 UK Research Council, the articles may be re-used under the terms of the Creative Commons Attribution-Non  
17 Commercial 3.0 Unported (CC BY-NC 3.0) see:

18  
19  
20 <http://creativecommons.org/licenses/by-nc/3.0/>

21  
22 and

23  
24 <http://creativecommons.org/licenses/by-nc/3.0/legalcode>

25  
26 or any updated versions as determined by the Publisher from time to time.

27  
28 or

29  
30 b) where the Original Research article and/or Open Access Funded Articles **is** funded by the Wellcome Trust or UK  
31 Research Council, the Contribution may be re-used under the terms of the Creative Commons Attribution 3.0  
32 Unported Licence (CC BY 3.0) see:

33  
34 <http://creativecommons.org/licenses/by/3.0/>

35  
36 and

37  
38 <http://creativecommons.org/licenses/by/3.0/legalcode>

39  
40 or any updated versions as determined by the Publisher from time to time  
41

42  
43  
44 subject to ensuring the Publishers and the Journal are referenced (including a full citation) as set out above; all third  
45 party rights within all images, diagrams, photograph, other illustrative material or films, not owned by the authors  
46 or BMJ Group are cleared independently and appropriately; and all the Publishers trademarks are removed from any  
47 derivative works and ensuring any translations, for which a prior translation agreement with BMJ Group has not  
48 been established, must prominently display the statement: "This is an unofficial translation of an article that  
49 appeared in a BMJ Group publication. BMJ Group has not endorsed this translation".  
50  
51

52  
53  
54  
55 7. The right to publish with the necessary acknowledgement of the Publishers and the Journal, all or part of the  
56 material from the published Contribution in a book, essay, position paper, or other non peer reviewed publication  
57 authored or edited by the Contributor(s)'s (which may be a Commercial Use). This does not apply to multiple  
58

Contributions in the same journal, for which permission from the Publishers must be sought.

8. The right to use selected figures and tables and (of which the author or his employer owns or has licensed) and selected text (up to 300 words) from the Contribution for incorporation within another work published in print or digital format by a third party, so long as full credit is given to the Publishers and use of the parts of the Contribution is non Commercial Use.

9. Subject to it not being contrary to English law to do so (such as for example where the UK has trading or other bans with the country of the Corresponding Authors origin or certain groups of people within), the right to receive a royalty for up to 5 years from publication of 10% of any net receipts less sales commission on single orders in excess of £2000 received by the Publisher for any single Contribution reprint or translation sales to a single third party, subject however to any fee being determined (if charged) at the absolute discretion of the Publishers as may be altered from time to time. If the Publishers receive such an order for reprint sales of the Contribution, they will contact the Corresponding Author at the address given on the published Contribution to find out to whom payment should be made. Corresponding Authors have the responsibility to ensure that all authors have agreed what should be done with any such royalty payment and to keep the Publisher updated with current contact details.

For permission to use materials that are beyond permitted here, visit <http://www.bmj.com/about-bmj/resources-readers/permissions>

“Commercial Use” includes:

- copying or downloading of documents, or linking to such postings, for further redistribution, sale or licensing, for a fee;
- copying, downloading or posting by a site or service that incorporates advertising with such content;
- the inclusion or incorporation of document content in other works or services (other than for legally permitted quotations with an appropriate citation) that is then available for sale or licensing, for a fee.
- use of documents or document content (other than for legally permitted quotations with appropriate citations) by organisations for any promotional or advertising purposes whether direct or indirect, whether for a fee or otherwise. Distribution by or on behalf of pharmaceutical organisations is considered in all cases as Commercial Use;
- use for the purposes of monetary reward by means of sale, resale, license, loan, hire transfer or other form of commercial exploitation.

#### Author warranties

1. The author(s) warrant that: i) they are the sole author(s) of the Contribution which is an original work; ii) the whole or a substantial part of the Contribution has not previously been published; iii) they or their employers are the copyright owners of the Contribution; iv) to the best of their knowledge that the Contribution does not contain anything which is libellous, illegal or infringes any third party’s copyright or other rights; v) that they have obtained all necessary written consents for any patient information which is supplied with the Contribution and vi) that they have declared or will accurately declare all competing interests to the Publisher.

#### Anti Bribery

As a service provider to the BMJ Group, you agree that you shall: (a) comply with all applicable laws, statutes, regulations and codes relating to anti-bribery and anti-corruption including but not limited to the Bribery Act 2010 (Relevant Requirements); b) not engage in any activity, practice or conduct which would constitute an offence under sections 1, 2 or 6 of the Bribery Act 2010 (as amended) if such activity, practice or conduct had been carried out in the UK; (c) comply with any Publisher Ethics and Anti-bribery Policy supplied to you from time to time including as contained as follows (Relevant Policies):

<http://group.bmj.com/group/about/corporate/Anti-Bribery%20and%20Corruption%20Policy%20-August%202012.pdf>;

(d) promptly report to the Chief Executive Officer or Chairman of the Publisher any request or demand for any undue financial or other advantage of any kind received by you in connection with the performance of this Agreement; Breach of this Clause shall be deemed a material breach of this Agreement.

### Law and Jurisdiction

To the fullest extent permitted by law, this Agreement will be governed by the laws of England and shall be governed and construed in accordance with the laws of England whose courts shall have exclusive jurisdiction, unless as at the date of formation of this Agreement either i) an English judgement could not be enforced in the Corresponding Author's stated country location; or ii) it would take six months or more for the BMJ Group to enforce an English judgement in the Corresponding Author's stated country location, then it is hereby agreed that this Agreement shall be governed by the laws of the Corresponding Author's stated country (or state if applicable) and their courts shall have jurisdiction. Notwithstanding any of the above, this clause is governed by the laws of England.

### The following statement must be included in your manuscript, together with the relevant tick box line below:

"I *Proton Rahman* The Corresponding Author of this article contained within the original manuscript which includes any diagrams & photographs within and any related or stand alone film submitted (the Contribution") has the right to grant on behalf of all authors and does grant on behalf of all authors, a licence to the BMJ Publishing Group Ltd and its licencees, to permit this Contribution (if accepted) to be published in the BMJ and any other BMJ Group products and to exploit all subsidiary rights, as set out in our licence set out at: <http://www.bmj.com/about-bmj/resources-authors/forms-policies-and-checklists/copyright-open-access-and-permission-reuse>."

IF YOU ARE A NATIONAL INSTITUTE OF HEALTH ("NIH") EMPLOYEE, CONTRACTOR OR TRAINEE the following cover sheet will be accepted by the BMJ Group and NIH and incorporated into the above Licence.

Please tick **one or more** boxes as appropriate:

- I am the sole author of the Contribution.
- I am one author signing on behalf of all co-owners of the Contribution.
- The Contribution has been made in the course of my employment and I am signing as authorised by my employer.
- I am a US Federal Government employee acting in the course of my employment.
- I am not a US Federal Government employee, but some or all of my co-authors are.
- I am an employee of the UK Crown\* acting in the course of my employment
- I am a US Federal Government employee acting in the course of my employment.
- I am not a US Federal Government employee, but some or all of my co-authors are.
- I am an employee of the UK Crown acting in the course of my employment
- I am not an employee of the UK Crown acting in the course of my employment but some/all of my co-authors are.\*

\*Such authors should consult guidance and if necessary return any completed form.

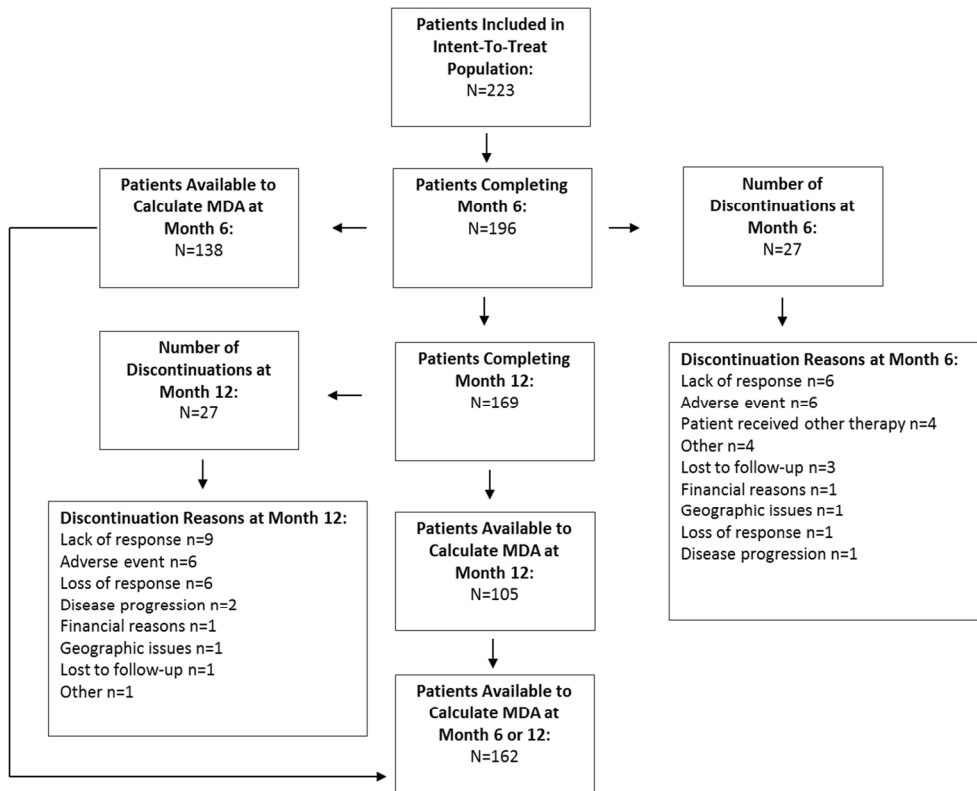

Flow chart of the patient population over time

90x72mm (600 x 600 DPI)

For peer review only

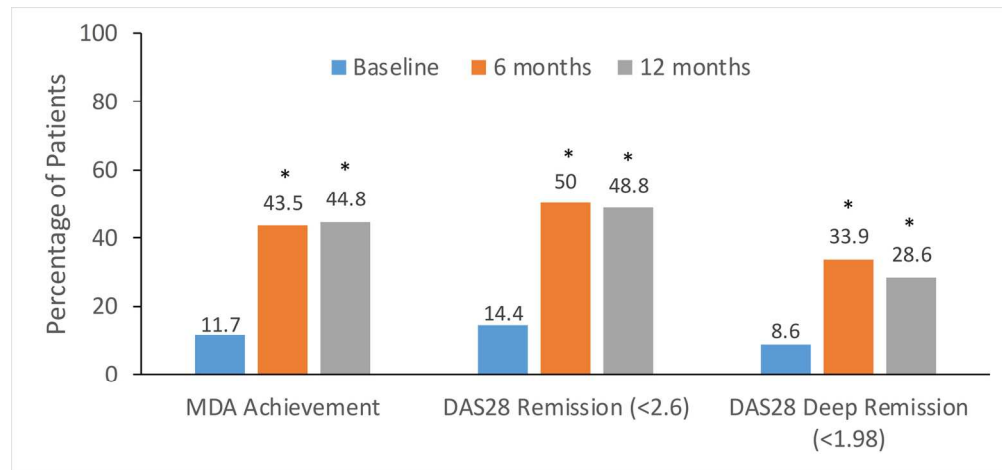

#### MDA Achievement, DAS28 Remission and DAS28 Deep Remission over Time

\*The improvement in MDA achievement, DAS28 remission and DAS28 deep remission from baseline to 6 months and from baseline to 12 months was assessed with the McNemar Test ( $p < 0.001$  for all, except DAS28 deep remission at 12 months  $p = 0.019$ ).

76x35mm (600 x 600 DPI)

1  
2  
3  
4  
5  
6  
7  
8  
9  
10  
11  
12  
13  
14  
15  
16  
17  
18  
19  
20  
21  
22  
23  
24  
25  
26  
27  
28  
29  
30  
31  
32  
33  
34  
35  
36  
37  
38  
39  
40  
41  
42  
43  
44  
45  
46  
47  
48  
49  
50  
51  
52  
53  
54  
55  
56  
57  
58  
59  
60

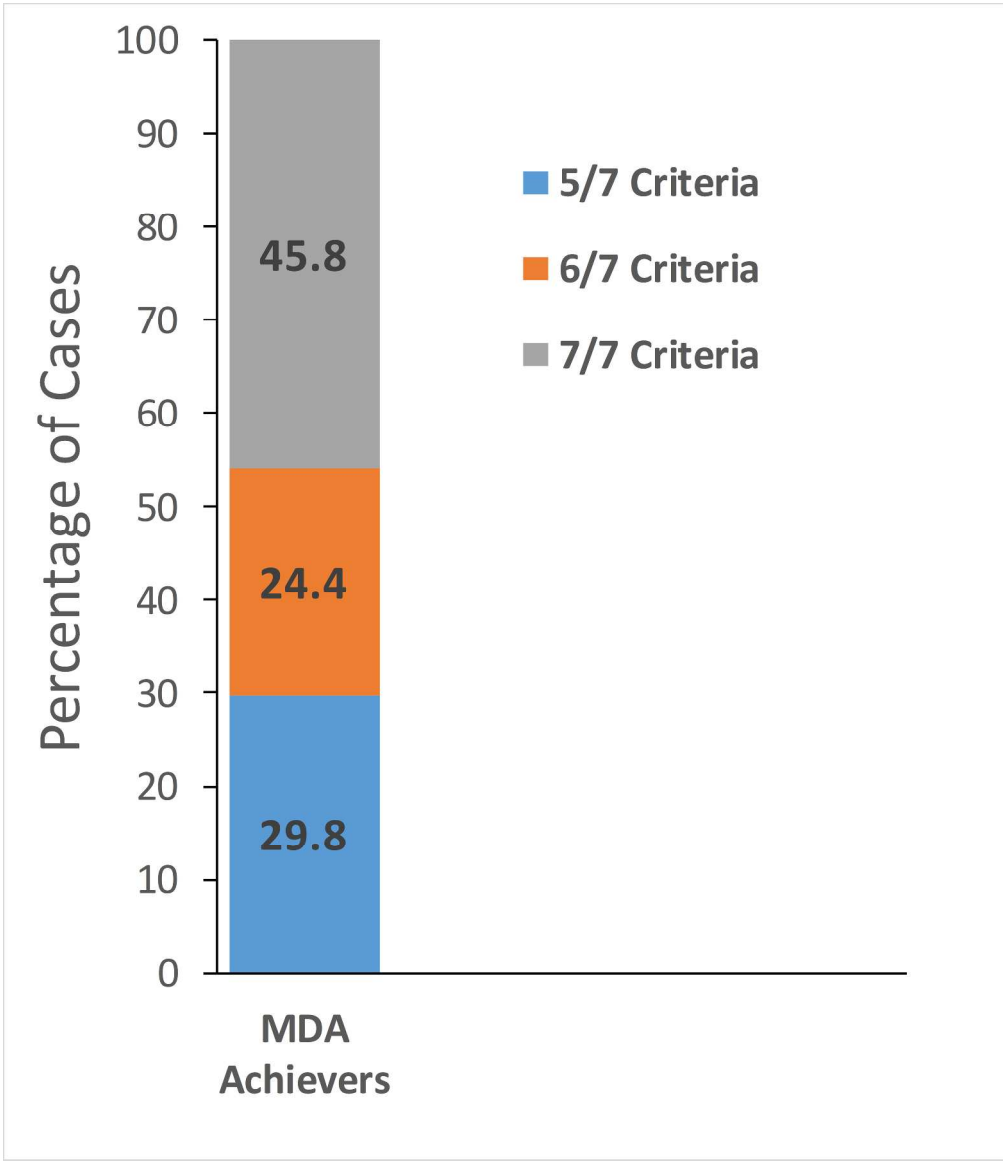

Proportion of Met Criteria among MDA Achievers

134x155mm (600 x 600 DPI)



1  
2  
3  
4  
5  
6  
7  
8  
9  
10  
11  
12  
13  
14  
15  
16  
17  
18  
19  
20  
21  
22  
23  
24  
25  
26  
27  
28  
29  
30  
31  
32  
33  
34  
35  
36  
37  
38  
39  
40  
41  
42  
43  
44  
45  
46  
47  
48  
49  
50  
51  
52  
53  
54  
55  
56  
57  
58  
59  
60

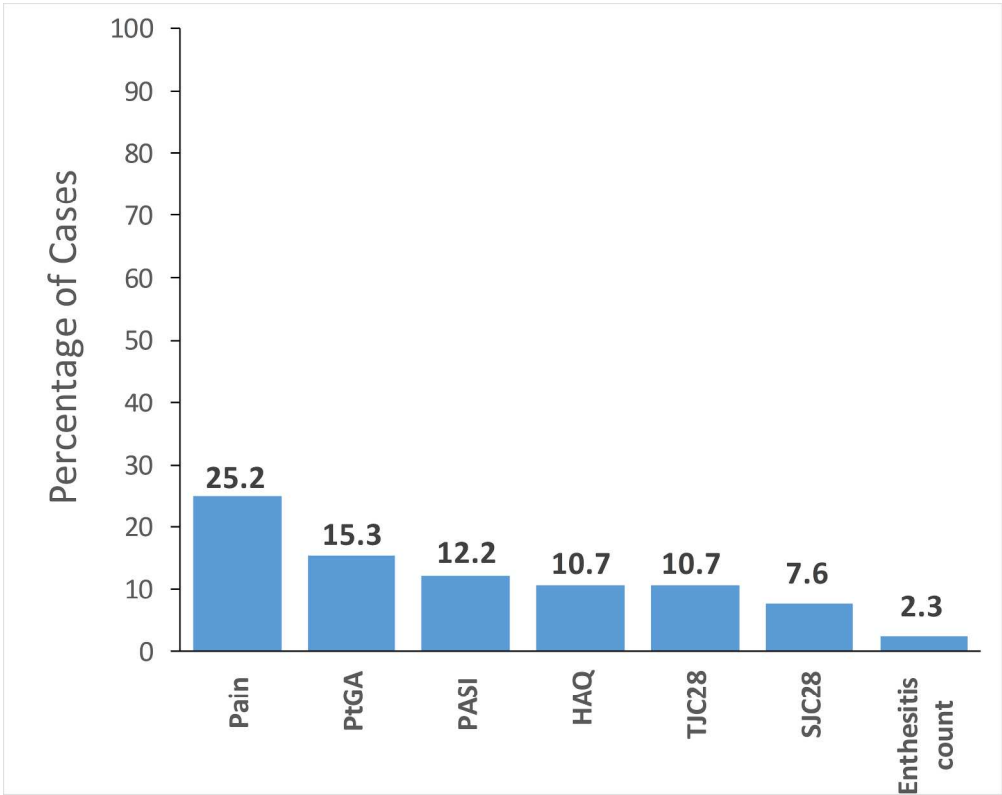

Proportion of Unmet Disease Criteria among MDA Achievers

118x93mm (600 x 600 DPI)

Peer Review Only

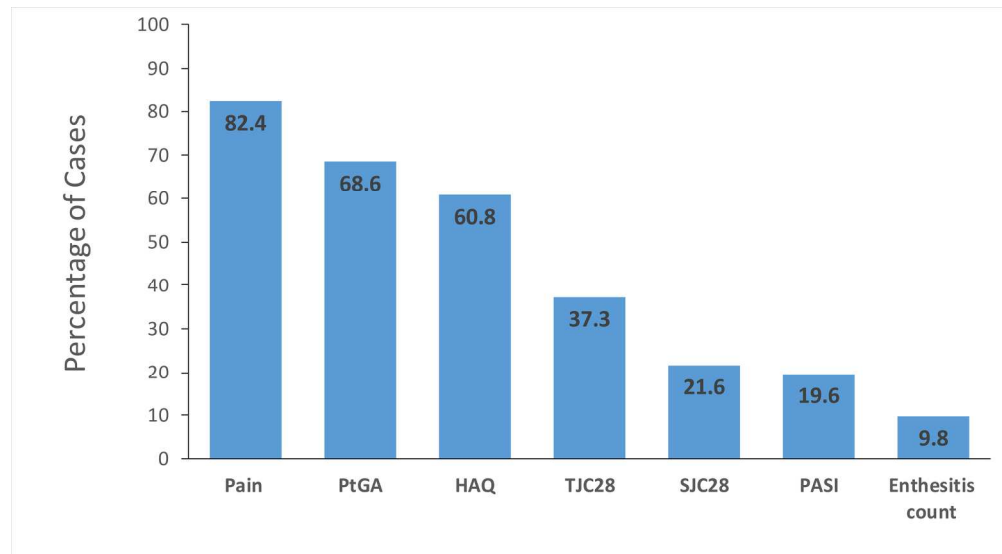

Proportion of Unmet Criteria among New MDA Achievers

99x54mm (600 x 600 DPI)

review only

1  
2  
3  
4  
5  
6  
7  
8  
9  
10  
11  
12  
13  
14  
15  
16  
17  
18  
19  
20  
21  
22  
23  
24  
25  
26  
27  
28  
29  
30  
31  
32  
33  
34  
35  
36  
37  
38  
39  
40  
41  
42  
43  
44  
45  
46  
47  
48  
49  
50  
51  
52  
53  
54  
55  
56  
57  
58  
59  
60

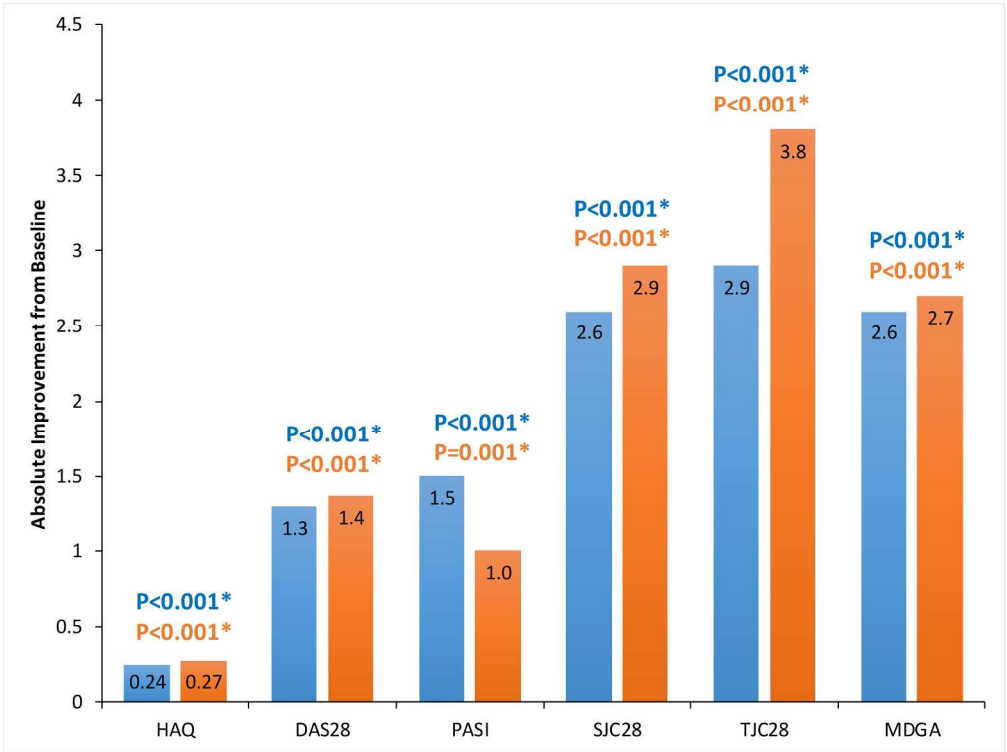

114x85mm (600 x 600 DPI)

ew only

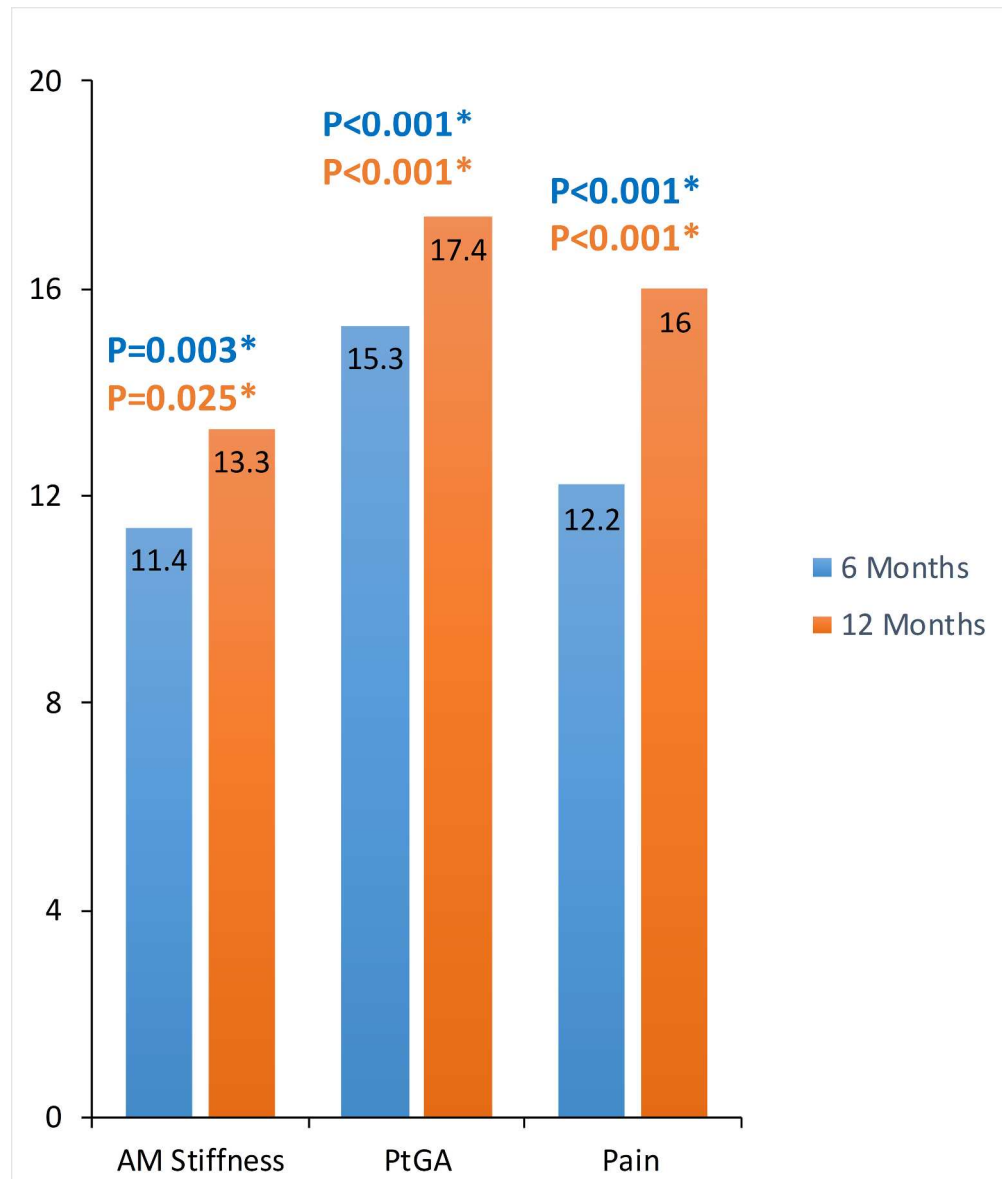

143x168mm (600 x 600 DPI)

1  
2  
3  
4  
5  
6  
7  
8  
9  
10  
11  
12  
13  
14  
15  
16  
17  
18  
19  
20  
21  
22  
23  
24  
25  
26  
27  
28  
29  
30  
31  
32  
33  
34  
35  
36  
37  
38  
39  
40  
41  
42  
43  
44  
45  
46  
47  
48  
49  
50  
51  
52  
53  
54  
55  
56  
57  
58  
59  
60

## STROBE Statement—checklist of items that should be included in reports of observational studies

|                              | Item No | Recommendation                                                                                                                                                                                                                                                                                                                                                                                                                                                                                                                                                                                                                                                                                   | Page No.                      |
|------------------------------|---------|--------------------------------------------------------------------------------------------------------------------------------------------------------------------------------------------------------------------------------------------------------------------------------------------------------------------------------------------------------------------------------------------------------------------------------------------------------------------------------------------------------------------------------------------------------------------------------------------------------------------------------------------------------------------------------------------------|-------------------------------|
| <b>Title and abstract</b>    | 1       | (a) Indicate the study's design with a commonly used term in the title or the abstract<br>(b) Provide in the abstract an informative and balanced summary of what was done and what was found                                                                                                                                                                                                                                                                                                                                                                                                                                                                                                    | 1<br>3-4                      |
| <b>Introduction</b>          |         |                                                                                                                                                                                                                                                                                                                                                                                                                                                                                                                                                                                                                                                                                                  |                               |
| Background/rationale         | 2       | Explain the scientific background and rationale for the investigation being reported                                                                                                                                                                                                                                                                                                                                                                                                                                                                                                                                                                                                             | 5-6                           |
| Objectives                   | 3       | State specific objectives, including any prespecified hypotheses                                                                                                                                                                                                                                                                                                                                                                                                                                                                                                                                                                                                                                 | 6-7                           |
| <b>Methods</b>               |         |                                                                                                                                                                                                                                                                                                                                                                                                                                                                                                                                                                                                                                                                                                  |                               |
| Study design                 | 4       | Present key elements of study design early in the paper                                                                                                                                                                                                                                                                                                                                                                                                                                                                                                                                                                                                                                          | 7                             |
| Setting                      | 5       | Describe the setting, locations, and relevant dates, including periods of recruitment, exposure, follow-up, and data collection                                                                                                                                                                                                                                                                                                                                                                                                                                                                                                                                                                  | 7-8                           |
| Participants                 | 6       | (a) <i>Cohort study</i> —Give the eligibility criteria, and the sources and methods of selection of participants. Describe methods of follow-up<br><i>Case-control study</i> —Give the eligibility criteria, and the sources and methods of case ascertainment and control selection. Give the rationale for the choice of cases and controls<br><i>Cross-sectional study</i> —Give the eligibility criteria, and the sources and methods of selection of participants<br>(b) <i>Cohort study</i> —For matched studies, give matching criteria and number of exposed and unexposed<br><i>Case-control study</i> —For matched studies, give matching criteria and the number of controls per case | 7-8                           |
| Variables                    | 7       | Clearly define all outcomes, exposures, predictors, potential confounders, and effect modifiers. Give diagnostic criteria, if applicable                                                                                                                                                                                                                                                                                                                                                                                                                                                                                                                                                         | 8                             |
| Data sources/<br>measurement | 8*      | For each variable of interest, give sources of data and details of methods of assessment (measurement). Describe comparability of assessment methods if there is more than one group                                                                                                                                                                                                                                                                                                                                                                                                                                                                                                             | 8                             |
| Bias                         | 9       | Describe any efforts to address potential sources of bias                                                                                                                                                                                                                                                                                                                                                                                                                                                                                                                                                                                                                                        | 7                             |
| Study size                   | 10      | Explain how the study size was arrived at                                                                                                                                                                                                                                                                                                                                                                                                                                                                                                                                                                                                                                                        | 7                             |
| Quantitative variables       | 11      | Explain how quantitative variables were handled in the analyses. If applicable, describe which groupings were chosen and why                                                                                                                                                                                                                                                                                                                                                                                                                                                                                                                                                                     | 8-9                           |
| Statistical methods          | 12      | (a) Describe all statistical methods, including those used to control for confounding<br>(b) Describe any methods used to examine subgroups and interactions<br>(c) Explain how missing data were addressed<br>(d) <i>Cohort study</i> —If applicable, explain how loss to follow-up was addressed<br><i>Case-control study</i> —If applicable, explain how matching of cases and controls was addressed<br><i>Cross-sectional study</i> —If applicable, describe analytical methods taking account of sampling strategy<br>(e) Describe any sensitivity analyses                                                                                                                                | 8-9<br>N/A<br>9<br>N/A<br>N/A |

Continued on next page

| <b>Results</b>           |     |                                                                                                                                                                                                                                                                                                                                                                                                               |                                  |
|--------------------------|-----|---------------------------------------------------------------------------------------------------------------------------------------------------------------------------------------------------------------------------------------------------------------------------------------------------------------------------------------------------------------------------------------------------------------|----------------------------------|
| Participants             | 13* | (a) Report numbers of individuals at each stage of study—eg numbers potentially eligible, examined for eligibility, confirmed eligible, included in the study, completing follow-up, and analysed<br>(b) Give reasons for non-participation at each stage<br>(c) Consider use of a flow diagram                                                                                                               | Page 9 & Fig.1<br>Fig.1<br>Fig.1 |
| Descriptive data         | 14* | (a) Give characteristics of study participants (eg demographic, clinical, social) and information on exposures and potential confounders<br>(b) Indicate number of participants with missing data for each variable of interest<br>(c) <i>Cohort study</i> —Summarise follow-up time (eg, average and total amount)                                                                                           | 9<br>8-9<br>11                   |
| Outcome data             | 15* | <i>Cohort study</i> —Report numbers of outcome events or summary measures over time<br><i>Case-control study</i> —Report numbers in each exposure category, or summary measures of exposure<br><i>Cross-sectional study</i> —Report numbers of outcome events or summary measures                                                                                                                             | 11<br>11                         |
| Main results             | 16  | (a) Give unadjusted estimates and, if applicable, confounder-adjusted estimates and their precision (eg, 95% confidence interval). Make clear which confounders were adjusted for and why they were included<br>(b) Report category boundaries when continuous variables were categorized<br>(c) If relevant, consider translating estimates of relative risk into absolute risk for a meaningful time period | 9-13<br>13<br>N/A                |
| Other analyses           | 17  | Report other analyses done—eg analyses of subgroups and interactions, and sensitivity analyses                                                                                                                                                                                                                                                                                                                | N/A                              |
| <b>Discussion</b>        |     |                                                                                                                                                                                                                                                                                                                                                                                                               |                                  |
| Key results              | 18  | Summarise key results with reference to study objectives                                                                                                                                                                                                                                                                                                                                                      | 14-16                            |
| Limitations              | 19  | Discuss limitations of the study, taking into account sources of potential bias or imprecision. Discuss both direction and magnitude of any potential bias                                                                                                                                                                                                                                                    | 15-16                            |
| Interpretation           | 20  | Give a cautious overall interpretation of results considering objectives, limitations, multiplicity of analyses, results from similar studies, and other relevant evidence                                                                                                                                                                                                                                    | 14-16                            |
| Generalisability         | 21  | Discuss the generalisability (external validity) of the study results                                                                                                                                                                                                                                                                                                                                         | 16                               |
| <b>Other information</b> |     |                                                                                                                                                                                                                                                                                                                                                                                                               |                                  |
| Funding                  | 22  | Give the source of funding and the role of the funders for the present study and, if applicable, for the original study on which the present article is based                                                                                                                                                                                                                                                 | 18-19                            |

\*Give information separately for cases and controls in case-control studies and, if applicable, for exposed and unexposed groups in cohort and cross-sectional studies.

**Note:** An Explanation and Elaboration article discusses each checklist item and gives methodological background and published examples of transparent reporting. The STROBE checklist is best used in conjunction with this article (freely available on the Web sites of PLoS Medicine at <http://www.plosmedicine.org/>, Annals of Internal Medicine at <http://www.annals.org/>, and Epidemiology at <http://www.epidem.com/>). Information on the STROBE Initiative is available at [www.strobe-statement.org](http://www.strobe-statement.org).

# BMJ Open

## Real World Validation of the Minimal Disease Activity Index in Psoriatic Arthritis: An Analysis from a Prospective, Observational, Biological Treatment Registry

|                                    |                                                                                                                                                                                                                                                                                                                                                                                                                                                                                                                                                                                                                                                                                                                                                                   |
|------------------------------------|-------------------------------------------------------------------------------------------------------------------------------------------------------------------------------------------------------------------------------------------------------------------------------------------------------------------------------------------------------------------------------------------------------------------------------------------------------------------------------------------------------------------------------------------------------------------------------------------------------------------------------------------------------------------------------------------------------------------------------------------------------------------|
| Journal:                           | <i>BMJ Open</i>                                                                                                                                                                                                                                                                                                                                                                                                                                                                                                                                                                                                                                                                                                                                                   |
| Manuscript ID                      | bmjopen-2017-016619.R1                                                                                                                                                                                                                                                                                                                                                                                                                                                                                                                                                                                                                                                                                                                                            |
| Article Type:                      | Research                                                                                                                                                                                                                                                                                                                                                                                                                                                                                                                                                                                                                                                                                                                                                          |
| Date Submitted by the Author:      | 19-Apr-2017                                                                                                                                                                                                                                                                                                                                                                                                                                                                                                                                                                                                                                                                                                                                                       |
| Complete List of Authors:          | Rahman, Proton; Memorial University of Newfoundland, Medicine<br>Zummer, Michel; Hôpital Maisonneuve-Rosemont<br>Bessette, Louis; Centre de Recherche du CHU de Québec<br>Baer, Philip; Private practice<br>Haraoui, Boulos; Centre Hospitalier de l'Université de Montréal<br>Chow, Andrew; Credit Valley Rheumatology,<br>Kelsall, John; Saint Paul's Hospital<br>Kapur, Suneil; University of Ottawa<br>Rampakakis, Emmanouil; JSS Medical Research Inc., Scientific Affairs<br>Psaradellis, Eliofotisti; JSS Medical Research Inc., Scientific Affairs<br>Lehman, Allen; Janssen Inc., Medical Affairs<br>Nantel, Francois; Janssen Inc., Medical Affairs<br>Osborne, Brendan; Janssen Inc., Medical Affairs<br>Tkaczyk, Cathy; Janssen Inc., Medical Affairs |
| <b>Primary Subject<br>Heading</b>: | Rheumatology                                                                                                                                                                                                                                                                                                                                                                                                                                                                                                                                                                                                                                                                                                                                                      |
| Secondary Subject Heading:         | Epidemiology, Evidence based practice, Rheumatology                                                                                                                                                                                                                                                                                                                                                                                                                                                                                                                                                                                                                                                                                                               |
| Keywords:                          | RHEUMATOLOGY, Clinical trials < THERAPEUTICS, EPIDEMIOLOGY,<br>PRIMARY CARE, STATISTICS & RESEARCH METHODS                                                                                                                                                                                                                                                                                                                                                                                                                                                                                                                                                                                                                                                        |
|                                    |                                                                                                                                                                                                                                                                                                                                                                                                                                                                                                                                                                                                                                                                                                                                                                   |

SCHOLARONE™  
Manuscripts

1  
2  
3 **Real World Validation of the Minimal Disease Activity Index in Psoriatic Arthritis: An**  
4  
5 **Analysis from a Prospective, Observational, Biological Treatment Registry**  
6  
7

8  
9  
10 **Corresponding Author:**

11 Full name: Proton Rahman

12 Postal address: Memorial University of Newfoundland, 230 Elizabeth Avenue, St. John's, NF  
13 A1B 3X9, Canada  
14

15 E-mail: [prahman@mun.ca](mailto:prahman@mun.ca)  
16  
17

18  
19  
20  
21 **Authors:**

22 Rahman P: Associate Dean, Clinical Research, Memorial University of Newfoundland, 230  
23 Elizabeth Avenue, Saint John's, NF, A1B 3X9, Canada

24 Zummer M: Head of Rheumatology, Hôpital Maisonneuve-Rosemont, 5415 Boulevard de  
25 l'Assomption, Montréal, QC, H1T 2M4, Canada

26 Bessette L: Rheumatologist, Centre de Recherche du CHU de Québec, 2325 rue de l'Université,  
27 Québec, QC, G1V 0A6, Canada

28 Baer P: Rheumatologist, Private Practice, 1333 Neilson Rd, Scarborough, ON, M1B 4Y9,  
29 Canada

30 Haraoui B: Rheumatologist, Centre Hospitalier de l'Université de Montréal, 1000 Rue Saint-  
31 Denis, Montréal, QC, H2X 3J4, Canada

32 Chow A: Rheumatologist, Credit Valley Rheumatology, 2000 Credit Valley Rd, Mississauga,  
33 ON, L5M 4N4, Canada

34 Kelsall J: Clinical Associate Professor, Saint Paul's Hospital, 1081 Burrard St, Vancouver, BC,  
35 V6Z 1Y6, Canada

36 Kapur S: Rheumatologist, University of Ottawa, 75 Laurier Ave E, Ottawa, ON, K1N 6N5,  
37 Canada

38 Rampakakis E: Vice President of Scientific Affairs, JSS Medical Research Inc., 9400 Henri-  
39 Bourassa O, St-Laurent, QC, H4S 1N8, Canada

40 Psaradellis E: Scientific Advisor, JSS Medical Research Inc., 9400 Henri-Bourassa O, St-  
41 Laurent, QC, H4S 1N8, Canada  
42  
43  
44  
45  
46  
47  
48  
49  
50  
51  
52  
53  
54  
55  
56  
57  
58  
59  
60



1  
2  
3 Lehman AJ: Medical & Scientific Liaison – Rheumatology, Western Canada, Janssen Inc., 19  
4 Green Belt Dr, Toronto, ON, M3C 1L9, Canada

5  
6  
7 Nantel F: Director, Medical Affairs – Rheumatology, Janssen Inc., 19 Green Belt Dr, Toronto,  
8 ON, M3C 1L9, Canada

9  
10 Osborne B: Medical and Scientific Liaison – Rheumatology, Janssen Inc., 19 Green Belt Dr,  
11 Toronto, ON, M3C 1L9, Canada

12  
13 Tkaczyk C: Medical and Scientific Liaison – Medical Affairs, Janssen Inc., 19 Green Belt Dr,  
14 Toronto, ON, M3C 1L9, Canada  
15  
16

17  
18  
19  
20  
21 Word count (excluding title page, abstract, references, figures and tables): 2,605 words  
22  
23  
24  
25  
26  
27  
28  
29  
30  
31  
32  
33  
34  
35  
36  
37  
38  
39  
40  
41  
42  
43  
44  
45  
46  
47  
48  
49  
50  
51  
52  
53  
54  
55  
56  
57  
58  
59  
60

1  
2  
3 **Key words:** Psoriatic arthritis, minimal disease activity, registry, real world, infliximab,  
4 golimumab  
5  
6  
7  
8  
9

### 10 **Structured Abstract**

11 **Objectives:** To describe the minimal disease activity (MDA) rate over time in psoriatic arthritis  
12 (PsA) patients receiving anti-TNF agents, evaluate prognostic factors of MDA achievement, and  
13 identify the most common unmet criteria among MDA achievers.  
14  
15  
16  
17

18 **Design:** Biologic Treatment Registry Across Canada (BioTRAC): ongoing, prospective registry  
19 of patients initiating treatment for rheumatoid arthritis, ankylosing spondylitis, or PsA with  
20 Infliximab (IFX), Golimumab (GLM) or ustekinumab.  
21  
22  
23  
24  
25  
26

27 **Setting:** 46 primary-care Canadian rheumatology practices.  
28

29 **Participants:** 223 PsA patients receiving IFX (enrolled since 2005) and GLM (enrolled since  
30 2010) with available MDA information at baseline, 6 months, and/or 12 months.  
31  
32  
33

34 **Primary and secondary outcome measures:** MDA was defined as  $\geq 5$  of the following criteria:  
35 Tender Joint Count (TJC)-28  $\leq 1$ , Swollen Joint Count (SJC)-28  $\leq 1$ , Psoriasis Area Severity  
36 Index (PASI)  $\leq 1$ , or Body Surface Area  $\leq 3$ , Pain (VAS)  $\leq 15$ mm, Patient's global assessment  
37 (PtGA) (VAS)  $\leq 20$ mm, HAQ  $\leq 0.5$ , tender enthesal points  $\leq 1$ . Independent prognostic factors of  
38 MDA achievement were assessed with multivariate logistic regression.  
39  
40  
41  
42  
43  
44

45 **Results:** MDA was achieved by 11.7% of patients at baseline, 43.5% at 6 months, 44.8% at 12  
46 months, and 48.8% at either 6 or 12 months. Among MDA achievers at 6 months, 75.7%  
47 sustained MDA at 12 months. Lower baseline HAQ (OR=0.210; 95% CI: 0.099-0.447) and  
48 lower TJC28 (OR=0.880; 95% CI: 0.804-0.964), were significant prognostic factors of MDA  
49 achievement over 12 months of treatment. The most commonly unmet MDA criteria among  
50 MDA achievers was patient reported pain (25%), PtGA (15%) and PASI (12%).  
51  
52  
53  
54  
55  
56  
57  
58  
59  
60

1  
2  
3 **Conclusions:** Almost 50% of patients treated with IFX or GLM in routine clinical care achieve  
4 MDA within the first year of treatment. Lower baseline HAQ and lower TJC28, were identified  
5 as significant prognostic factors of MDA achievement. The most commonly unmet criteria in  
6 patients who achieved MDA were pain, PtGA and PASI.  
7  
8  
9

10  
11  
12 **Trial Registration:** NCT00741793, “Biologic Treatment Registry Across Canada (BioTRAC)”  
13  
14

15  
16  
17 **Strengths and limitations of this study:**  
18

- 19 • The limitations in the current study are that the peripheral joint activity was measured  
20 using the 28 tender/swollen joint count although the Outcome Measures in Rheumatology  
21 Clinical Trials (OMERACT) recommends the measure of 68 tender/66 swollen joint  
22 counts.  
23
- 24 • Furthermore, although several approaches were used to assess disease activity,  
25 radiographic images are not collected in BioTRAC, therefore not allowing the  
26 examination of radiographic progression.  
27
- 28 • There is also potential bias given the observational nature of the study, a bias that is  
29 avoided when using data from clinical trials.  
30
- 31 • The strength of the study is that patients were seen in a real world setting by Canadian  
32 rheumatologists during routine clinical practice which enhances the generalizability of  
33 the results to the target population.  
34  
35  
36  
37  
38  
39  
40  
41  
42  
43  
44  
45  
46  
47  
48  
49  
50  
51  
52  
53  
54  
55  
56  
57  
58  
59  
60

## INTRODUCTION

Psoriatic arthritis (PsA) is a chronic systemic inflammatory musculoskeletal disease characterized by synovitis, axial disease, enthesitis, or dactylitis, and psoriasis. It is variably associated with other extra-articular manifestations that affects women and men equally.[1] PsA also affects up to 30 to 40% of patients with psoriasis.[2] Previously PsA was considered a mild disease; however, evidence from the last two decades has shown that it is frequently an erosive and deforming in 40 to 60% of patients who are diagnosed within the first few years.[3-5] Furthermore, similarly to other rheumatic diseases such as rheumatoid arthritis (RA), PsA has been associated with impaired physical function, reduced quality of life, and increased mortality,[6-8] with about 20% of patients eventually developing a highly destructive and disabling form of PsA.[9] Manifestations of PsA contribute to disease burden due to the negative effects on the patient's psychological and psychosocial functioning, dissatisfaction with the management of the disease and the negative impact on daily living activities.[10]

Over the years, major clinical improvements have been achieved in the outcome of inflammatory rheumatic diseases due to improved treatment availability and more commonly adopted early treatment algorithms including the treat to target strategy which has become the standard of care for newly diagnosed patients in RA.[11,12] Treatment therapies in PsA such as tumor necrosis factor  $\alpha$  blockers (anti TNF  $\alpha$ ), have demonstrated a reduction in disease activity and radiographic progression of joint damage.[13-15] Although remission remains the ultimate treatment goal, the complexity of PsA makes it difficult to identify valid criteria that mark a state of remission or low disease activity that take into account all dimensions of the clinical manifestations of the disease. In the past decades, different scores were used to evaluate the disease severity of PsA such as the Disease Activity Score using 28 joints (DAS28) originally developed for RA assessment, as well as the Psoriatic Arthritis Disease Activity Score

1  
2  
3 (PASDAS), a weighted index comprising assessments of joints, function, acute-phase response,  
4  
5 quality of life (QOL), and patient and physician global VAS scores, and the Composite Psoriatic  
6  
7 Disease Activity Index (CPDAI) which takes into account the assessment of different domains  
8  
9 such as peripheral arthritis, skin disease, spinal disease, dactylitis, and enthesitis. The minimal  
10  
11 disease activity (MDA) was developed to take into account the heterogeneity seen and measure  
12  
13 the disease activity of several clinical domains which is a more suitable outcome measure  
14  
15 compared to DAS28 which does not take into consideration the full spectrum of disease  
16  
17 manifestations.[16] These MDA criteria were validated in randomized controlled trials and  
18  
19 observational studies demonstrating that patients who achieved MDA for a period of 12 months  
20  
21 or more experienced a reduction in radiographic joint damage progression.[17,18] The tight  
22  
23 control of inflammation in early psoriatic arthritis (TICOPA) trial was the first randomised,  
24  
25 controlled trial, with a treat to target approach in PsA patients where the tight control group were  
26  
27 reviewed every 4 weeks with escalation of treatment if MDA criteria wasn't met. Patients in the  
28  
29 tight control group showed significant improvements in joint and skin disease activity, as well as  
30  
31 benefits in function and QOL compared to the standard of care group.[19] However as far as we  
32  
33 know, no real world evidence data on MDA are available in the literature.

34  
35  
36  
37  
38  
39  
40  
41 The aim of the current study is to 1) describe the rate of MDA achievement over time, 2)  
42  
43 evaluate prognostic factors of MDA achievement, 3) assess which unmet criteria were more  
44  
45 common among patients who achieved MDA, 4) evaluate which unmet criteria were more  
46  
47 common among patients who were near MDA achievers, and 5) assess DAS28 remission,  
48  
49 DAS28 deep remission, and the level of agreement between MDA and DAS28 remission in PsA  
50  
51 patients treated with infliximab or golimumab, in a routine clinical practice setting. The analysis  
52  
53 was done using data from the Biologic Treatment Registry Across Canada (BioTRAC), an  
54  
55  
56  
57  
58  
59  
60

1  
2  
3 ongoing, community based, Canada-wide, multi-centre, prospective, observational registry of  
4  
5 patients with inflammatory arthritis.  
6  
7  
8  
9

## 11 **METHODS**

### 13 **Study design**

15 BioTRAC is an ongoing Canadian multi-centre, prospective, observational registry collecting  
16  
17 real world clinical, laboratory, patient-centric, and safety data in rheumatoid arthritis, ankylosing  
18  
19 spondylitis, and psoriatic arthritis patients treated with infliximab (IFX), golimumab (GLM), or  
20  
21 ustekinumab as part of their routine care. The historical development of the registry has been  
22  
23 described by Thorne et al.[20] To date there are over 100 rheumatology sites, participating, both  
24  
25 in an institutional and private setting, with over 2100 patients enrolled in the programme across  
26  
27 all indications. In accordance with the observational nature of the registry, there is no protocol-  
28  
29 defined intervention in patient management. All clinical decisions and treatments are based on  
30  
31 routine practice and the judgement of the treating physicians. Patients provided written informed  
32  
33 consent prior to participation in the study. Ethics approval for participation in the BioTRAC  
34  
35 program was obtained from the respective Research Ethics Boards (REB) of participating  
36  
37 institutional sites and a Central Institutional Review Board (IRB Services, Ontario Canada) for  
38  
39 private practice sites. BioTRAC is conducted according to the tenets of the Declaration of  
40  
41 Helsinki.  
42  
43  
44  
45  
46  
47

### 48 **Study population**

50 Biologic-naïve patients or patients previously treated with one biologic who are eligible for  
51  
52 treatment with infliximab, golimumab, or ustekinumab as per their respective Canadian Product  
53  
54 Monograph are considered for inclusion in the registry. For the purpose of the current analysis,  
55  
56 223 patients with PsA treated with infliximab (enrolled since 2005) or with golimumab (enrolled  
57  
58  
59  
60

1  
2  
3 since 2010) were included from 46 primary care rheumatology practices across Canada. All  
4  
5 efficacy analyses were observed and included all enrolled PsA patients who received at least one  
6  
7 dose of IFX or GLM, and had at least one follow up assessment with available MDA data at 6 or  
8  
9 12 months. Figure 1 represents the flow chart of the patient population over time.  
10  
11

### 12 13 **Data collection**

14 The following clinical/laboratory parameters and patient reported outcomes (PROs) are collected  
15  
16 as per routine care at baseline and at all follow up visits, with suggested assessments every six  
17  
18 months given that this is within acceptable practice patterns for patients with active PsA:  
19  
20 morning (AM) stiffness, swollen joint count (SJC28), tender joint count (TJC28), patient's  
21  
22 (PtGA), and physician's (MDGA) global assessment of disease activity, health assessment  
23  
24 questionnaire (HAQ), patient's assessment of pain, C-reactive protein (CRP), and erythrocyte  
25  
26 sedimentation rate (ESR).  
27  
28  
29  
30

### 31 32 **Statistical Analysis**

33 Descriptive statistics included mean and standard deviations for continuous variables, and  
34  
35 proportions for categorical variables. The absolute improvement in disease parameters at 6 and  
36  
37 12 months of treatment was assessed with the non-parametric Wilcoxon Signed Ranks test, while  
38  
39 between group differences for continuous and categorical variables were assessed with the non-  
40  
41 parametric Kruskal-Wallis test and the Pearson Chi-square test, respectively. The improvement  
42  
43 in MDA achievement, DAS28 remission (<2.6), and DAS28 deep remission (<1.98) over time  
44  
45 was assessed for statistical significance with the McNemar test. Independent prognostic factors  
46  
47 of MDA achievement at 6 or 12 months of treatment were assessed with backward conditional  
48  
49 logistic regression; covariates considered were: province, gender, age, baseline biologic agent,  
50  
51 MDGA, PtGA, pain, HAQ, SJC28, TJC28, and enthesitis count with probability for stepwise  
52  
53 entry and removal at the 0.05 and 0.10 level, respectively. MDA was defined as the fulfillment of  
54  
55  
56  
57  
58  
59  
60

1  
2  
3  $\geq 5$  of the following criteria: TJC28 $\leq 1$ , SJC28 $\leq 1$ , PASI $\leq 1$ , pain (VAS)  $\leq 15$  mm, PtGA (VAS)  
4  $\leq 20$  mm, HAQ $\leq 0.5$ , tender enthesal points  $\leq 1$ . [18] Modified MDA (mMDA) was defined as  
5  
6 having skin and swollen joints as mandatory criteria of the 5/7 criteria. Near MDA was defined  
7  
8 as fulfillment of 4/7 criteria. Patients with missing information included gender (n=21), age  
9  
10 (n=89), disease duration (n=76), while baseline parameters for DAS28 (n=49), MDGA (n=31),  
11  
12 CRP (n=51), ESR (n=48), AM stiffness (n=34), and TJC28, SJC28, PtGA, HAQ, pain, PASI (all,  
13  
14 n=27). Furthermore 12%, 30%, and 38% of patients had missing MDA at baseline, 6 and 12-  
15  
16 month follow-up, respectively (see Figure 1). DAPSA was defined as the sum of TJC28, SJC28,  
17  
18 CRP (mg/dl), PtGA (VAS 0-10) and pain (VAS 0-10). There was no imputation of missing data  
19  
20 in the current analysis. Statistical analyses were conducted with SPSS 21.0 (SPSS Inc., Chicago,  
21  
22 IL).  
23  
24  
25  
26  
27  
28  
29

## 30 RESULTS

31  
32 Table 1 summarizes the patient demographics and characteristics by region at baseline. There  
33  
34 were 130 (58.3%) and 93 (41.7%) patients on GLM and IFX, respectively. Mean (SD) age and  
35  
36 disease duration was 49.8 (11.1) and 5.4 (6.3) years, respectively, and 50% were males. Baseline  
37  
38 disease parameters for DAS28, TJC, SJC, pain, PtGA, MDGA, morning stiffness, HAQ, CRP,  
39  
40 and ESR were statistically comparable at baseline among Canadian regions. However significant  
41  
42 differences between regional groups were observed at baseline for mean (SD) disease duration  
43  
44 (p=0.002), enthesitis count [Western: 6.8 (3.3), Ontario: 4.6 (4.2), Quebec: 3.4 (2.1), Maritime:  
45  
46 5.8 (3.6); p=0.012], and PASI [Western: 3.8 (4.2), Ontario: 3.7 (5.4), Quebec: 1.4 (2.9),  
47  
48 Maritime: 1.2 (1.5); p<0.001]. Furthermore, use of a previous biologic (p=0.017), previous  
49  
50 DMARD (p=0.047), and previous corticosteroid (p=0.006) showed significant between group  
51  
52 differences among regions (Table 1).  
53  
54  
55  
56  
57  
58  
59  
60



Table 1. Demographics and disease characteristics by region at baseline

| Parameter                            | Western<br>(N=18) | Ontario<br>(N=111) | Quebec<br>(N=63) | Maritimes<br>(N=31) | p-value | Total<br>(N=223) |
|--------------------------------------|-------------------|--------------------|------------------|---------------------|---------|------------------|
| <b>Socio-demographics</b>            |                   |                    |                  |                     |         |                  |
| Gender, n (%) <sup>a</sup>           |                   |                    |                  |                     |         |                  |
| Male                                 | 5 (38.5)          | 44 (43.1)          | 35 (58.3)        | 17 (63.0)           | 0.107   | 101 (50.0)       |
| Female                               | 8 (61.5)          | 58 (56.9)          | 25 (41.7)        | 10 (37.0)           |         | 101 (50.0)       |
| Age (years), mean (SD)               | 50.7 (14.6)       | 49.7 (10.7)        | 51.0 (11.6)      | 46.5 (9.9)          | 0.393   | 49.8 (11.1)      |
| <b>Disease Parameters, mean (SD)</b> |                   |                    |                  |                     |         |                  |
| Disease duration (years)             | 4.0 (4.6)         | 5.4 (6.2)          | 7.5 (7.4)        | 1.9 (2.0)           | 0.002   | 5.4 (6.3)        |
| DAS28                                | 4.3 (0.8)         | 4.4 (1.7)          | 4.2 (1.3)        | 4.3 (1.8)           | 0.928   | 4.3 (1.6)        |
| TJC28                                | 8.1 (6.4)         | 7.1 (6.7)          | 5.8 (5.0)        | 9.0 (9.2)           | 0.555   | 7.0 (6.7)        |
| SJC28                                | 4.1 (3.8)         | 4.6 (4.7)          | 5.2 (4.1)        | 5.0 (5.1)           | 0.549   | 4.8 (4.5)        |
| MDGA (VAS cm)                        | 6.0 (2.1)         | 5.1 (2.4)          | 5.5 (2.3)        | 4.6 (1.4)           | 0.062   | 5.2 (2.2)        |
| PtGA (VAS mm)                        | 54.5 (27.1)       | 52.0 (28.3)        | 49.5 (22.2)      | 46.0 (25.6)         | 0.662   | 50.5 (26.1)      |
| AM stiffness <sup>b</sup> (min)      | 54.6 (49.2)       | 48.1 (47.6)        | 35.5 (39.8)      | 49.1 (43.3)         | 0.237   | 45.0 (45.0)      |
| HAQ                                  | 1.3 (0.5)         | 1.1 (0.7)          | 1.1 (0.6)        | 1.0 (0.7)           | 0.263   | 1.1 (0.7)        |
| Pain (VAS mm)                        | 47.9 (23.0)       | 49.2 (27.5)        | 48.4 (23.0)      | 40.7 (23.6)         | 0.492   | 47.6 (25.4)      |
| PASI                                 | 3.8 (4.2)         | 3.7 (5.4)          | 1.4 (2.9)        | 1.2 (1.5)           | <0.001  | 2.6 (4.4)        |
| Enthesitis count <sup>c</sup>        | 6.8 (3.3)         | 4.6 (4.2)          | 3.4 (2.1)        | 5.8 (3.6)           | 0.012   | 4.9 (3.5)        |
| ESR (mm/h)                           | 14.0 (15.3)       | 22.5 (22.9)        | 19.4 (16.4)      | 19.0 (22.3)         | 0.566   | 20.7 (20.7)      |
| CRP (mg/L)                           | 12.4 (13.6)       | 17.7 (36.9)        | 10.7 (14.2)      | 14.1 (27.6)         | 0.952   | 14.7 (29.1)      |
| <b>Medications, n (%)</b>            |                   |                    |                  |                     |         |                  |
| <b>Baseline Biologic Agent</b>       |                   |                    |                  |                     |         |                  |
| GLM                                  | 8 (44.4)          | 69 (62.2)          | 39 (61.9)        | 14 (45.2)           | 0.200   | 130 (58.3)       |
| IFX                                  | 10 (55.6)         | 42 (37.8)          | 24 (38.1)        | 17 (54.8)           |         | 93 (41.7)        |
| Previous biologic                    | 3 (21.4)          | 5 (5.3)            | 10 (17.2)        | 7 (24.1)            | 0.017   | 25 (12.8)        |
| Previous DMARD                       | 12 (85.7)         | 59 (62.1)          | 47 (81.0)        | 21 (72.4)           | 0.047   | 139 (70.9)       |

|                                |           |           |           |           |       |            |
|--------------------------------|-----------|-----------|-----------|-----------|-------|------------|
| Previous corticosteroid        | 6 (42.9)  | 17 (17.9) | 21 (36.2) | 3 (10.3)  | 0.006 | 47 (24.0)  |
| Concomitant DMARD              | 11 (78.6) | 52 (54.7) | 40 (69.0) | 19 (65.5) | 0.164 | 122 (62.2) |
| Concomitant Methotrexate       | 4 (28.6)  | 43 (45.3) | 35 (60.3) | 16 (55.2) | 0.102 | 98 (50.0)  |
| Concomitant corticosteroid use | 1 (7.1)   | 10 (10.5) | 7 (12.1)  | 2 (6.9)   | 0.868 | 20 (10.2)  |

<sup>a</sup>Percentages based on available data

<sup>b</sup>Capped at 120 minutes.

<sup>c</sup>Among patients with enthesitis.

DAS28, Disease Activity Score; HAQ, Health assessment questionnaire; MDGA, Physician Global Assessment of Disease Activity; PASI, Psoriasis Area and Severity Index; PtGA, Patient Global Assessment of Disease Activity; SJC, Swollen joint count; TJC, Tender joint count; GLM, golimumab; IFX, infliximab.

All disease parameters showed statistically significant improvement over time from baseline to month 6 and month 12 ( $p < 0.05$ ) (supplementary material).

Figure 2 describes achievement of MDA, mMDA, DAS28 remission, DAS28 deep remission, and DAPSA remission over time. At baseline, 6, and 12 months of treatment, 11.7%, 43.5%, and 44.8% of patients achieved MDA, respectively, while 48.8% achieved MDA at 6 or 12 months. Additionally, 34.6% ( $n=28/81$ ) achieved MDA at both 6 and 12 months of treatment (overall sustained MDA). Patients achieving mMDA at baseline, 6 and 12 months was 7.1%, 37.7%, and 36.2%, respectively. DAS28 remission ( $< 2.6$ ) was achieved by 14.4%, 50.0%, and 48.8% of patients, DAS28 deep remission ( $< 1.98$ ) by 8.6%, 33.9%, and 28.6%, and DAPSA remission ( $\leq 4$ ), by 6.4%, 23.3%, and 25.0% at baseline, 6 months, and 12 months of treatment, respectively (Figure 2). The improvement in MDA achievement, DAS28 remission, and DAS28 deep remission from baseline to 6 months and 12 months was statistically significant for all measures of disease activity ( $p < 0.05$ ). Table 2 depicts sensitivity, specificity, positive and negative predictive values between MDA or mMDA and DAS28 remission, DAS28 deep remission, as well as DAPSA remission. There was substantial agreement between MDA and DAS28 remission as well as MDA and DAPSA remission with a Kappa measure of agreement of 0.653 and 0.652, respectively (both  $p < 0.001$ ) while that between MDA and DAS28 deep

remission showed moderate agreement with 0.598 ( $p < 0.001$ ). Similar results were observed for the association of mMDA with the relevant outcome measures.

**Table 2. Agreement between MDA or mMDA, with DAS28 and DAPSA**

| Diagnostic Criteria Definitions | DAS28<br>Remission<br>( $< 2.6$ ) | DAS28 Deep<br>Remission<br>( $< 1.98$ ) | DAPSA<br>Remission<br>( $\leq 4$ ) |
|---------------------------------|-----------------------------------|-----------------------------------------|------------------------------------|
| <b>MDA</b>                      |                                   |                                         |                                    |
| Sensitivity                     | 70.7%                             | 82.1%                                   | 100.0%                             |
| Specificity                     | 92.3%                             | 85.7%                                   | 85.9%                              |
| Positive Predictive Value       | 82.1%                             | 60.4%                                   | 56.3%                              |
| Negative Predictive Value       | 86.4%                             | 94.7%                                   | 100.0%                             |
| Kappa agreement (K)             | 0.653                             | 0.598                                   | 0.652                              |
| <b>mMDA</b>                     |                                   |                                         |                                    |
| Sensitivity                     | 57.7%                             | 71.8%                                   | 87.0%                              |
| Specificity                     | 94.8%                             | 90.4%                                   | 89.9%                              |
| Positive Predictive Value       | 84.5%                             | 66.7%                                   | 61.0%                              |
| Negative Predictive Value       | 81.9%                             | 92.3%                                   | 97.5%                              |
| Kappa agreement (K)             | 0.570                             | 0.605                                   | 0.655                              |

Univariate analysis (Table 3A) showed that male gender ( $p = 0.031$ ) and lower age ( $p = 0.011$ ) were significantly associated with MDA achievement at 6 or 12 months of treatment. Furthermore, significant between-region differences were observed for MDA achievement at 6 or 12 months of treatment ( $p = 0.019$ ). Ontario and Quebec patients had the highest MDA rates with 56.0% and 52.9%, respectively, while 36.4% and 14.3% of patients in Maritime and Western provinces reached MDA, respectively. In addition, significantly lower disease severity

was observed at baseline among MDA achievers for the following disease parameters: MDGA (p<0.001), PtGA (p<0.001), pain (p<0.001), HAQ (p<0.001), SJC28 (p=0.001), TJC28 (p<0.001), and enthesitis count (p=0.013). Multivariate logistic regression analysis (Table 3B) showed that lower baseline HAQ (OR=0.210, p<0.001) and lower TJC28 (OR=0.880, p=0.006) were significant prognostic factors of MDA achievement over 12 months of treatment, while parameters of lower enthesitis count (OR=0.838, p=0.069) and GLM as the biologic agent (OR=2.228, p=0.073) showed a trend towards statistical significance. Overall, similar results were obtained when assessing predictors of mMDA instead of MDA (data not shown).

**Table 3A. Univariate Analysis for MDA Achievement at 6 or 12 Months of Treatment**

| Parameters                                       | MDA achievement at 6 or 12 months |             | p-value <sup>c</sup> |
|--------------------------------------------------|-----------------------------------|-------------|----------------------|
|                                                  | Yes                               | No          |                      |
| <b>Province, n (%)</b>                           |                                   |             |                      |
| <i>Western</i>                                   | 2 (14.3)                          | 12 (85.7)   | 0.019                |
| <i>Ontario</i>                                   | 42 (56.0)                         | 33 (44.0)   |                      |
| <i>Quebec</i>                                    | 27 (52.9)                         | 24 (47.1)   |                      |
| <i>Maritimes</i>                                 | 8 (36.4)                          | 14 (63.6)   |                      |
| <b>Gender, n (%)</b>                             |                                   |             |                      |
| <i>Male</i>                                      | 45 (59.2)                         | 31 (40.8)   | 0.031                |
| <i>Female</i>                                    | 28 (40.6)                         | 41 (59.4)   |                      |
| <b>Age, mean (SD)</b>                            | 46.6 (12.0)                       | 51.6 (10.7) | 0.011                |
| <b>MDGA (VAS cm)<sup>a</sup>, mean (SD)</b>      | 4.3 (2.4)                         | 5.9 (2.0)   | <0.001               |
| <b>PtGA (VAS mm)<sup>a</sup>, mean (SD)</b>      | 39.7 (24.7)                       | 56.8 (24.9) | <0.001               |
| <b>Pain (VAS mm)<sup>a</sup>, mean (SD)</b>      | 35.6 (24.4)                       | 55.1 (23.2) | <0.001               |
| <b>HAQ<sup>a</sup>, mean (SD)</b>                | 0.7 (0.6)                         | 1.3 (0.6)   | <0.001               |
| <b>SJC28<sup>a</sup>, mean (SD)</b>              | 3.4 (3.8)                         | 5.4 (4.4)   | 0.001                |
| <b>TJC28<sup>a</sup>, mean (SD)</b>              | 3.8 (4.1)                         | 8.8 (6.8)   | <0.001               |
| <b>Enthesitis count<sup>a,b</sup>, mean (SD)</b> | 0.7 (1.4)                         | 2.0 (3.3)   | 0.013                |
| <b>Baseline biologic agent</b>                   |                                   |             |                      |
| GLM                                              | 48 (53.9)                         | 41 (46.1)   | 0.158                |

IFX 31 (42.5) 42 (57.5)

<sup>a</sup>Denotes disease parameters at baseline.

<sup>b</sup>Among all patients (with and without enthesitis).

<sup>c</sup>P-value was assessed with chi-square for categorical variables or with non-parametric Mann-Whitney U test for continuous variables.

**Table 3B. Multivariate Analysis for MDA Achievement at 6 or 12 Months of Treatment**

| Parameters                           | Beta   | Odds Ratio | 95% Confidence Intervals |       | p-value |
|--------------------------------------|--------|------------|--------------------------|-------|---------|
|                                      |        |            | for Odds Ratio           |       |         |
|                                      |        |            | Lower                    | Upper |         |
| Baseline HAQ                         | -1.561 | 0.210      | 0.099                    | 0.447 | <0.001  |
| Baseline TJC28                       | -0.128 | 0.880      | 0.804                    | 0.964 | 0.006   |
| Baseline enthesitis count            | -0.177 | 0.838      | 0.692                    | 1.014 | 0.069   |
| Baseline biologic agent: GLM vs. IFX | 0.801  | 2.228      | 0.929                    | 5.343 | 0.073   |

Multivariate analysis was assessed with backward conditional logistic regression, covariates entered were: province, gender, age, baseline biologic agent, MDGA, PtGA, Pain, HAQ, SJC28, TJC28, and enthesitis count with probability for stepwise entry and removal at the 0.05 and 0.10 level, respectively.

Among the patients who achieved MDA at any time point, the highest proportion met all 7 MDA criteria with 45.8%, while 24.4% met 6/7 criteria, and 29.8% met 5/7 criteria (Figure 3A). The most commonly unmet criteria among these cases were patient-reported pain (with 25.2%), PtGA (with 15.3%), and PASI (with 12.2%) (Figure 3B). Additionally, among the 309 instances of non-MDA achievement, the proportion of cases that achieved near MDA was 16.5% (51/309). The most common reason for non-MDA in near-MDA cases was patient-reported pain (82.4%) followed by PtGA (68.6%), and HAQ (60.8%) (Figure 3C). Interestingly, 9 patients with available data that had reached MDA at 6 months were not in MDA state after 12 months. It was determined that the most common criteria not met in this group were: PtGA (88.9%), enthesitis count (66.7%), TJC (55.6%), and PASI (33.3%).

## DISCUSSION

The current analysis is the first community-based Canadian study presenting a 12 month follow up of 223 prospectively followed patients with PsA from the BioTRAC registry. All measures of disease activity in the current study showed a statistical improvement over time ( $p<0.05$ ).

Reported MDA achievement at 6 and 12 months of treatment was comparable with 43.5% and 44.8%, respectively. Among MDA achievers at 6 months, 75.7% ( $n=28/37$ ) had sustained MDA at 12 months. The MDA achievement rate of approximately 45% is in line with the rates reported by Mease et al. despite the randomized controlled setting of this study.[21] However, our findings are lower in comparison with two recent studies which reported that 64% of the study population achieved MDA after 12 months of treatment with anti TNF  $\alpha$  therapy [22,23].

A slightly higher proportion of patients (48.8%) achieved DAS28 remission at 12 months compared to MDA, while the rates of mMDA (36.2%), DAS28 deep remission (28.6%) and DAPSA remission (25.0%) were lower suggesting that the latter measures are more strict. However, the MDA had substantial agreement with DAS28 and DAPSA remission, whereas moderate agreement was observed with DAS28 deep remission. Thus, the current analysis suggests that MDA criteria may be a more powerful and discriminatory method to assess PsA than DAS28. The simplicity in calculating MDA and the lack of requirement for acute phase reactants at the time of visit as compared to the DAS28, makes the MDA a more desirable and practical tool to measure disease outcome in PsA.

Adjusted analysis of baseline variables showed that lower HAQ, lower TJC28, lower enthesitis count, and GLM as the biologic agent were considered independent prognostic factors of MDA achievement over 12 months of treatment. In addition to HAQ [24,25], previous studies have also identified shorter symptom duration, greater general well-being (global visual analogue

1  
2  
3 scale) [24], younger age, higher C-reactive protein (CRP), and lower BASFI as significant  
4  
5 predictors of MDA, which however, were not confirmed in our study.[26] Moreover, other  
6  
7 studies have shown that baseline lower HAQ, higher swollen joint count, and no previous use of  
8  
9 anti TNF  $\alpha$  therapy are also prognostic factors of remission at 12 months of treatment.[27,28]

10  
11 The current results also showed that the most common limiting factors among patients who  
12  
13 achieved MDA were including pain, PtGA, and PASI. Among patients who achieved near-MDA,  
14  
15 the most commonly unmet criteria were pain, PtGA, and HAQ. These results highlight the  
16  
17 difference in perception of disease activity by physicians and patients in the relative importance  
18  
19 placed on specific disease aspects.  
20  
21  
22  
23

24  
25 All disease parameters showed a statistically significant improvement at 6 months of treatment  
26  
27 and were sustained over the 12-month period. In a prospective cohort study by Saber *et al.*,  
28  
29 statistically significant improvements in clinical outcome measures were also observed for  
30  
31 TJC28, SJC28, CRP, and HAQ at 12 months in patients treated with anti TNF  $\alpha$  therapy  
32  
33 (p<0.001 for all), wherein statistical improvement was achieved within the first 3 months of  
34  
35 treatment.[27]  
36  
37  
38

39  
40 The limitations of the current study are that the peripheral joint activity was measured using the  
41  
42 28 tender/swollen joint count although the Outcome Measures in Rheumatology Clinical Trials  
43  
44 (OMERACT) recommends the measure of 68 tender/66 swollen joint counts.[16] However,  
45  
46 simplified joint counts have been shown to be sufficiently sensitive to measure clinical response  
47  
48 in PsA patients.[29] Furthermore, although several approaches were used to assess disease  
49  
50 activity, radiographic images are not collected in BioTRAC, therefore not allowing the  
51  
52 examination of radiographic progression. There is also potential bias given the observational  
53  
54 nature of the study, a bias that is avoided when using data from clinical trials. The strength of the  
55  
56  
57  
58  
59  
60

1  
2  
3 study is that patients were seen in a real world setting by Canadian rheumatologists during  
4  
5 routine clinical practice which enhances the generalizability of the results to the target  
6  
7 population.  
8  
9

10  
11 In conclusion, our results showed overall improvement in clinical parameters and disease activity  
12  
13 in PsA patients treated with infliximab or golimumab during the 2 year follow up. By 6 and 12  
14  
15 months of treatment almost 50% of patients achieved MDA, and among achievers of MDA the  
16  
17 most commonly unmet criteria were patient-reported pain, PtGA, and PASI. Furthermore, lower  
18  
19 baseline HAQ and lower TJC at baseline, were identified as significant prognostic factors of  
20  
21 MDA achievement. This study provides evidence supporting the validity of MDA in real world  
22  
23 and its usefulness in patient management under routine clinical care.  
24  
25  
26  
27  
28  
29  
30  
31  
32  
33  
34  
35  
36  
37  
38  
39  
40  
41  
42  
43  
44  
45  
46  
47  
48  
49  
50  
51  
52  
53  
54  
55  
56  
57  
58  
59  
60



**FIGURE LEGENDS**

Figure 2. MDA Achievement, mMDA Achievement, DAS28 Remission, DAS28 Deep Remission, and DAPSA Remission over Time

■ Baseline   ■ 6 months   ■ 12 months

Figure 3A. Proportion of Met Criteria among MDA Achievers

■ 5/7 Criteria

■ 6/7 Criteria

■ 7/7 Criteria

peer review only

1  
2  
3 **Acknowledgments:** Not applicable  
4  
5  
6

7 **Competing interests:**

8  
9 Dr. Rahman reports personal fees from Janssen Inc., during the conduct of the study; personal  
10 fees from Abbott, AbbVie, Amgen, BMS, Celgene, Novartis, Pfizer, Roche, outside the  
11 submitted work. Dr. Zummer, Dr. Chow and Dr. Kapur report personal fees from Janssen Inc.,  
12 during the conduct of the study. Dr. Bessette reports personal fees from Janssen Inc., during the  
13 conduct of the study; personal fees from Amgen, BMS, Roche, UCB, AbbVie, Pfizer, Merck,  
14 Sanofi, Celgene, Lilly, Novartis, outside the submitted work. Dr. Baer reports personal fees from  
15 Janssen Inc., during the conduct of the study; personal fees from AbbVie, Amgen, BMS, Pfizer,  
16 Roche, outside the submitted work. Dr. Haraoui reports personal fees from Janssen Inc., during  
17 the conduct of the study; personal fees from AbbVie, Amgen, BMS, Celgene, Pfizer, Roche,  
18 UCB, outside the submitted work. Dr. Kelsall reports personal fees from Janssen Inc., during the  
19 conduct of the study; personal fees from Abbott, AstraZeneca, BMS, Merck-Schering, Lilly,  
20 Pfizer, Wyeth, Roche, Takeda, UCB, outside the submitted work. Dr. Rampakakis and Ms.  
21 Psaradellis report personal fees from Janssen Inc. as employees of JSS Medical Research Inc.,  
22 the CRO hired, during the conduct of the study. Dr. Lehman, Dr. Nantel, Dr. Osborne and Dr.  
23 Tkaczyk report personal fees as employees of Janssen Inc., during the conduct of the study.  
24  
25  
26  
27  
28  
29  
30  
31  
32  
33  
34  
35  
36

37 **Funding:** This work was supported by Janssen Inc.  
38  
39  
40

41 **Contributorship statement:**

42 Dr. Rahman, Dr. Zummer, Dr. Bessette, Dr. Baer, Dr. Haraoui, Dr. Chow, Dr. Kelsall and Dr.  
43 Kapur substantially contributed to the acquisition of the data for the work and revised the  
44 manuscript for important intellectual property. Dr. Rampakakis, Dr. Lehman, Dr. Nantel, Dr.  
45 Osborne and Dr. Tkaczyk substantially contributed to the conception or design of the work and  
46 the interpretation of the data for the work, and revised the manuscript critically for important  
47 intellectual content. Ms. Psaradellis substantially contributed to the analysis and interpretation of  
48 data for the work and drafted the manuscript. All authors approved the version to be published  
49 and agreed to be accountable for all aspects of the work in ensuring that questions related to the  
50 accuracy or integrity of any part of the work were appropriately investigated and resolved.  
51  
52  
53  
54  
55  
56  
57  
58  
59  
60

1  
2  
3  
4  
5 **Role of study sponsor:** The sponsor, Janssen Inc., participated in the study design and  
6 interpretation of the data and funded all aspects of the study, but did not have an impact on data  
7 collection or the decision to submit the article for publication. The writing was conducted by a  
8 third party and the sponsor critically reviewed the manuscript.  
9  
10  
11

12  
13  
14 **Independence:** The study researchers were independent from funders.  
15  
16

17  
18 **Access to data:** All authors, external and internal, had full access to all of the data (including  
19 statistical reports and tables) in the study and can take responsibility for the integrity of the data  
20 and the accuracy of the data analysis.  
21  
22  
23

24 **Transparency declaration:** The lead author affirms that the manuscript is an honest, accurate,  
25 and transparent account of the study being reported; no important aspects of the study have been  
26 omitted; any discrepancies from the study as planned have been explained.  
27  
28  
29

30  
31 **Data sharing:** No additional data available.  
32  
33

34  
35 **Checklist:** The criteria described in the STROBE guidelines (checklist) have been satisfied.  
36  
37

38  
39 **What this paper adds:**

40 **What is already known on this subject:**

- 41 • The control of disease activity adopting the treat-to-target strategy or minimal disease  
42 activity (MDA) has not been carefully established and is becoming the current challenge  
43 in management of PSA.  
44
- 45 • As far as we know, there is no real-world evidence data on MDA available in the  
46 literature and our study will address this need.  
47  
48  
49  
50

51  
52  
53 **What this study adds:**

- 54 • The results of the current study showed that almost 50% of patients achieved MDA  
55 within the first year of treatment and thus provides evidence supporting the validity of  
56  
57  
58  
59  
60

1  
2  
3  
4  
5  
6  
7  
8  
9  
10  
11  
12  
13  
14  
15  
16  
17  
18  
19  
20  
21  
22  
23  
24  
25  
26  
27  
28  
29  
30  
31  
32  
33  
34  
35  
36  
37  
38  
39  
40  
41  
42  
43  
44  
45  
46  
47  
48  
49  
50  
51  
52  
53  
54  
55  
56  
57  
58  
59  
60

MDA in Canadian real-world and its usefulness in patient management under routine  
clinical care.

For peer review only

## REFERENCE LIST

## References

- 1 Sonoda KH, Inaba S, Ariyama A, et al. Therapeutic neutrophil apheresis in patients with ocular Behcet disease. *Arch Ophthalmol* 2005;123(2):267-269.
- 2 Khraishi M, Chouela E, Bejar M, et al. High prevalence of psoriatic arthritis in a cohort of patients with psoriasis seen in a dermatology practice. *J Cutan Med Surg* 2012;16(2):122-127.
- 3 Kane D, Stafford L, Bresnihan B, et al. A prospective, clinical and radiological study of early psoriatic arthritis: an early synovitis clinic experience. *Rheumatology (Oxford)* 2003;42(12):1460-1468.
- 4 McHugh NJ, Balachrishnan C, Jones SM. Progression of peripheral joint disease in psoriatic arthritis: a 5-yr prospective study. *Rheumatology (Oxford)* 2003;42(6):778-783.
- 5 Gladman DD, Stafford-Brady F, Chang CH, et al. Longitudinal study of clinical and radiological progression in psoriatic arthritis. *J Rheumatol* 1990;17(6):809-812.
- 6 Wong K, Gladman DD, Husted J, et al. Mortality studies in psoriatic arthritis: results from a single outpatient clinic. I. Causes and risk of death. *Arthritis Rheum* 1997;40(10):1868-1872.
- 7 Husted JA, Gladman DD, Farewell VT, et al. Health-related quality of life of patients with psoriatic arthritis: a comparison with patients with rheumatoid arthritis. *Arthritis Rheum* 2001;45(2):151-158.
- 8 Husted JA, Tom BD, Farewell VT, et al. A longitudinal study of the effect of disease activity and clinical damage on physical function over the course of psoriatic arthritis: Does the effect change over time? *Arthritis Rheum* 2007;56(3):840-849.
- 9 Gladman DD, Antoni C, Mease P, et al. Psoriatic arthritis: epidemiology, clinical features, course, and outcome. *Ann Rheum Dis* 2005;64 Suppl 2:ii14-17.
- 10 Yu AP, Tang J, Xie J, et al. Economic burden of psoriasis compared to the general population and stratified by disease severity. *Curr Med Res Opin* 2009;25(10):2429-2438.
- 11 Schoels M, Knevel R, Aletaha D, et al. Evidence for treating rheumatoid arthritis to target: results of a systematic literature search. *Ann Rheum Dis* 2010;69(4):638-643.
- 12 National Institute for Health and Clinical Excellence. The management of rheumatoid arthritis in adults. 2009. <http://www.nice.org.uk/guidance/cg79> (accessed 28 Mar 2016).
- 13 Gladman DD, Mease PJ, Ritchlin CT, et al. Adalimumab for long-term treatment of psoriatic arthritis: forty-eight week data from the adalimumab effectiveness in psoriatic arthritis trial. *Arthritis Rheum* 2007;56(2):476-488.
- 14 Mease PJ, Kivitz AJ, Burch FX, et al. Etanercept treatment of psoriatic arthritis: safety, efficacy, and effect on disease progression. *Arthritis Rheum* 2004;50(7):2264-2272.
- 15 van der Heijde D, Kavanaugh A, Gladman DD, et al. Infliximab inhibits progression of radiographic damage in patients with active psoriatic arthritis through one year of treatment: Results from the induction and maintenance psoriatic arthritis clinical trial 2. *Arthritis Rheum* 2007;56(8):2698-2707.
- 16 Coates LC, Fransen J, Helliwell PS. Defining minimal disease activity in psoriatic arthritis: a proposed objective target for treatment. *Ann Rheum Dis* 2010;69(1):48-53.
- 17 Coates LC, Cook R, Lee KA, et al. Frequency, predictors, and prognosis of sustained minimal disease activity in an observational psoriatic arthritis cohort. *Arthritis Care Res (Hoboken)* 2010;62(7):970-976.

- 1  
2  
3 18 Coates LC, Helliwell PS. Validation of minimal disease activity criteria for psoriatic  
4 arthritis using interventional trial data. *Arthritis Care Res (Hoboken)* 2010;62(7):965-969.  
5  
6 19 Coates LC, Moverley AR, McParland L, et al. Effect of tight control of inflammation in  
7 early psoriatic arthritis (TICOPA): a UK multicentre, open-label, randomised controlled trial.  
8 *Lancet* 2015;386(10012):2489-2498.  
9  
10 20 Thorne C, Bensen WG, Choquette D, et al. Effectiveness and safety of infliximab in  
11 rheumatoid arthritis: analysis from a canadian multicenter prospective observational registry.  
12 *Arthritis Care Res (Hoboken)* 2014;66(8):1142-1151.  
13  
14 21 Mease PJ, Heckaman M, Kary S, et al. Application and modifications of minimal disease  
15 activity measures for patients with psoriatic arthritis treated with adalimumab: subanalyses of  
16 ADEPT. *J Rheumatol* 2013;40(5):647-652.  
17  
18 22 Haddad A, Thavaneswaran A, Ruiz-Arruza I, et al. Minimal disease activity and anti-  
19 tumor necrosis factor therapy in psoriatic arthritis. *Arthritis Care Res (Hoboken)* 2015;67(6):842-  
20 847.  
21  
22 23 Lubrano E, Perrotta FM, Parsons WJ, et al. Patient's Global Assessment as an Outcome  
23 Measure for Psoriatic Arthritis in Clinical Practice: A Surrogate for Measuring Low Disease  
24 Activity? *J Rheumatol* 2015.  
25  
26 24 Theander E, Husmark T, Alenius GM, et al. Early psoriatic arthritis: short symptom  
27 duration, male gender and preserved physical functioning at presentation predict favourable  
28 outcome at 5-year follow-up. Results from the Swedish Early Psoriatic Arthritis Register  
29 (SwePsA). *Ann Rheum Dis* 2014;73(2):407-413.  
30  
31 25 Kavanaugh A, van der Heijde D, Beutler A, et al. Patients with psoriatic arthritis who  
32 achieve minimal disease activity in response to golimumab therapy demonstrate less  
33 radiographic progression: Results through 5 years of the randomized, placebo-controlled, GO-  
34 REVEAL study. *Arthritis Care Res (Hoboken)* 2015.  
35  
36 26 Iervolino S, Di Minno MN, Peluso R, et al. Predictors of early minimal disease activity in  
37 patients with psoriatic arthritis treated with tumor necrosis factor-alpha blockers. *J Rheumatol*  
38 2012;39(3):568-573.  
39  
40 27 Saber TP, Ng CT, Renard G, et al. Remission in psoriatic arthritis: is it possible and how  
41 can it be predicted? *Arthritis Res Ther* 2010;12(3):R94.  
42  
43 28 Eder L, Chandran V, Schentag CT, et al. Time and predictors of response to tumour  
44 necrosis factor-alpha blockers in psoriatic arthritis: an analysis of a longitudinal observational  
45 cohort. *Rheumatology (Oxford)* 2010;49(7):1361-1366.  
46  
47 29 Englbrecht M, Wang Y, Ronneberger M, et al. Measuring joint involvement in  
48 polyarticular psoriatic arthritis: an introduction of alternatives. *Arthritis Care Res (Hoboken)*  
49 2010;62(7):977-983.  
50  
51  
52  
53  
54  
55  
56  
57  
58  
59  
60

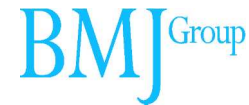

## BMJ

### Licence to BMJ Publishing Group Limited (“BMJ Group”) for Publication

To be agreed to by the corresponding author or guarantor on behalf of all authors (“Corresponding Author”). All authors collectively are referred to as the “Contributors”

In consideration of the BMJ Group (“the Publishers”) considering to publish the article contained within the original manuscript which includes without limitation any diagrams, photographs, other illustrative material, video, film or any other material howsoever submitted by the Contributor(s) at any time and related to the Contribution (“the Contribution”) in the BMJ (“the Journal”), certain rights are required to be granted by each different category of author(s), which are as follows:

1. For employees of the **UK Crown acting in the course of their employment**- a non exclusive Licence, as set out below. All provisions of this document apply. The non exclusivity relates to the original submitted manuscript video, films, images, photographs, diagrams and/or illustrative material only.
2. For employees of the **US Federal Government employees acting in the course of their employment**, no copyright exists and the Contribution is in the public domain so no licence is required to be granted. The Author Warranties below apply (excluding 1.iii).
3. For all other authors, an exclusive Licence, as set out below. All provisions of this document apply.

**NB** where a Contribution is a multi authored work, each author’s element of the Contribution will be dealt with in accordance with 1, 2 or 3 above, as applicable.

#### The Licence

The Licence granted in accordance with 1 or 3 above is:

A worldwide, licence, to the Publishers and its licensees in perpetuity (subject to the Reversion of Rights set out below), in all forms, formats and media (whether known now or created in the future), **to** i) publish, reproduce, distribute, display and store the Contribution, ii) translate the Contribution into other languages, create adaptations, reprints, include within collections and create summaries, extracts and/or, abstracts of the Contribution and convert or allow conversion into any format including without limitation audio, iii) create any other derivative work(s) based in whole or part on the Contribution, iv) to exploit all subsidiary rights that currently exist or as may exist in the future in the Contribution, v) the inclusion of electronic links from the Contribution to third party material wherever it may be located; and, vi) licence any third party to do any or all of the above.

If you and/or any co-author’s employer owns the copyright to your contribution you must obtain in writing the relevant employers’ consent to grant the licence and agree to all obligations herein. The author(s) hereby agree that in the event that the BMJ Group sell, the whole or part of its journal business to any third party, the benefit and the burden of the Licence contained herein shall be assigned to that third party.

#### Additional Rights and Obligations

The author(s) (and their employers as applicable), hereby authorise the Publishers to take such steps as they consider necessary at their own expense in the copyright owners name and on their behalf, if they believe that a third party is infringing or is likely to infringe copyright or the rights granted to the Publishers herein in the Contribution without further recourse to the copyright owner(s).

For Original Research articles and Open Access Funded Articles (as both defined below), the Publishers expressly agree to place the published Contribution for display on PubMed Central (including its international mirror sites) promptly without charge to the authors or their employers (provided Pubmed Central does not charge the Publishers), which will include any Publishers’ supplied amendments or retractions.



1  
2  
3  
4  
5 “**Original Research**” means an article reporting a research study, with a research structured abstract and normally  
6 appearing in the Research section of the BMJ. “**Open Access Funded Articles**” means articles funded in whole or  
7 part by a research grant from a government and/or charitable organisation(s) that requires open access deposit in  
8 PubMed Central. Such articles are identified by the reference to a Creative Commons licence.  
9

10  
11 The author(s) acknowledge and accept that BMJ Group may make additional changes to the contribution as  
12 considered necessary in accordance with standard editorial processes whether before or after publication. The  
13 Corresponding Author will usually see proofs for their Contributions and every effort will be made to consult with  
14 the Corresponding Author if substantial alterations are made. The BMJ Group may also retract or publish a  
15 correction or other notice when it considers this appropriate for legal or editorial reasons and this shall be at its  
16 absolute discretion which shall be exercised reasonably.  
17  
18  
19  
20

### 21 22 **Reversion of Rights**

23 If the Contribution is not published in either the print or electronic versions of the Journal or any other Publisher(s)  
24 products, within 12 months of final acceptance by the BMJ Group, (or as otherwise agreed), any Licence granted  
25 herein shall automatically terminate and all rights shall revert to the copyright owner. The Publishers may keep a  
26 copy of the Contribution as a record (including via any contractor).  
27

### 28 **Rights Granted to Owners of the Contribution**

29 Ownership of copyright remains with the author(s) or their employers. All rights not expressly granted are, subject  
30 to the Licence terms, reserved by the Publishers. In return for the grant of the Licence herein, the copyright owner(s)  
31 shall have the following rights for **non-Commercial Use (unless otherwise stated)** of the Contribution:

- 32 1. The right to reproduce a reasonable number (no more than 100) print copies of the final Contribution, by copying  
33 or downloading from the BMJ Group website, for personal use and to send copies to colleagues in print or electronic  
34 form provided no fee is charged and this is not done on a systematic basis ( which includes via mass e-mailings).  
35
- 36 2. The right to include the Contribution in a compilation for classroom use (course packs) to be distributed free of  
37 charge (other than for direct photocopying cost) to students at the Contributor(s)’s institution or to be stored in  
38 digital format in data rooms for access by students as part of their course work and for in house training  
39 programmes of the Contributor(s)’s employer or at seminars or conferences subject to a limit of 100 copies per  
40 conference or seminar.  
41
- 42 3. For all articles (excluding articles commissioned by the Publishers), the right to post a version of the final  
43 published version of the Contribution, or any abstract of the final published Contribution on the Contributor(s)’s  
44 own and/or his/her institution’s website after the Publisher’s publication.  
45
- 46 4. For all Publisher commissioned articles, the right to post a version of the final published version of the  
47 Contribution, or any abstract of the final published Contribution on the Contributor(s)’s own and/or his/her  
48 institution’s website 12 months after publication.  
49  
50  
51  
52  
53  
54  
55  
56  
57  
58  
59  
60



1  
2  
3 5. The following statement must accompany the articles posted on the Contributor(s)'s and/or his/her institution's  
4 website:

5  
6  
7 "This article has been published in the BMJ [insert full citation reference] and can also be viewed on the journal's  
8 website at [www.bmj.com](http://www.bmj.com)"  
9

10  
11 6. In addition, for Original Research articles and Open Access Funded Articles copyright owners (and the  
12 Publishers) may and may allow third parties to use the Contribution in accordance one of the following Creative  
13 Commons licences depending on the source of the research funding as per below:

14  
15 a) where the Original Research article and/or Open Access Funded Articles **is not** funded by the Wellcome Trust or  
16 UK Research Council, the articles may be re-used under the terms of the Creative Commons Attribution-Non  
17 Commercial 3.0 Unported (CC BY-NC 3.0) see:

18  
19  
20 <http://creativecommons.org/licenses/by-nc/3.0/>

21  
22 and

23  
24 <http://creativecommons.org/licenses/by-nc/3.0/legalcode>

25  
26 or any updated versions as determined by the Publisher from time to time.

27  
28 or

29  
30 b) where the Original Research article and/or Open Access Funded Articles **is** funded by the Wellcome Trust or UK  
31 Research Council, the Contribution may be re-used under the terms of the Creative Commons Attribution 3.0  
32 Unported Licence (CC BY 3.0) see:

33  
34 <http://creativecommons.org/licenses/by/3.0/>

35  
36 and

37  
38 <http://creativecommons.org/licenses/by/3.0/legalcode>

39  
40 or any updated versions as determined by the Publisher from time to time

41  
42  
43 subject to ensuring the Publishers and the Journal are referenced (including a full citation) as set out above; all third  
44 party rights within all images, diagrams, photograph, other illustrative material or films, not owned by the authors  
45 or BMJ Group are cleared independently and appropriately; and all the Publishers trademarks are removed from any  
46 derivative works and ensuring any translations, for which a prior translation agreement with BMJ Group has not  
47 been established, must prominently display the statement: "This is an unofficial translation of an article that  
48 appeared in a BMJ Group publication. BMJ Group has not endorsed this translation".  
49  
50  
51  
52  
53

54  
55 7. The right to publish with the necessary acknowledgement of the Publishers and the Journal, all or part of the  
56 material from the published Contribution in a book, essay, position paper, or other non peer reviewed publication  
57 authored or edited by the Contributor(s)'s (which may be a Commercial Use). This does not apply to multiple  
58  
59  
60

Contributions in the same journal, for which permission from the Publishers must be sought.

8. The right to use selected figures and tables and (of which the author or his employer owns or has licensed) and selected text (up to 300 words) from the Contribution for incorporation within another work published in print or digital format by a third party, so long as full credit is given to the Publishers and use of the parts of the Contribution is non Commercial Use.

9. Subject to it not being contrary to English law to do so (such as for example where the UK has trading or other bans with the country of the Corresponding Authors origin or certain groups of people within), the right to receive a royalty for up to 5 years from publication of 10% of any net receipts less sales commission on single orders in excess of £2000 received by the Publisher for any single Contribution reprint or translation sales to a single third party, subject however to any fee being determined (if charged) at the absolute discretion of the Publishers as may be altered from time to time. If the Publishers receive such an order for reprint sales of the Contribution, they will contact the Corresponding Author at the address given on the published Contribution to find out to whom payment should be made. Corresponding Authors have the responsibility to ensure that all authors have agreed what should be done with any such royalty payment and to keep the Publisher updated with current contact details.

For permission to use materials that are beyond permitted here, visit <http://www.bmj.com/about-bmj/resources-readers/permissions>

“Commercial Use” includes:

- copying or downloading of documents, or linking to such postings, for further redistribution, sale or licensing, for a fee;
- copying, downloading or posting by a site or service that incorporates advertising with such content;
- the inclusion or incorporation of document content in other works or services (other than for legally permitted quotations with an appropriate citation) that is then available for sale or licensing, for a fee.
- use of documents or document content (other than for legally permitted quotations with appropriate citations) by organisations for any promotional or advertising purposes whether direct or indirect, whether for a fee or otherwise. Distribution by or on behalf of pharmaceutical organisations is considered in all cases as Commercial Use;
- use for the purposes of monetary reward by means of sale, resale, license, loan, hire transfer or other form of commercial exploitation.

#### Author warranties

1. The author(s) warrant that: i) they are the sole author(s) of the Contribution which is an original work; ii) the whole or a substantial part of the Contribution has not previously been published; iii) they or their employers are the copyright owners of the Contribution; iv) to the best of their knowledge that the Contribution does not contain anything which is libellous, illegal or infringes any third party’s copyright or other rights; v) that they have obtained all necessary written consents for any patient information which is supplied with the Contribution and vi) that they have declared or will accurately declare all competing interests to the Publisher.

#### Anti Bribery

As a service provider to the BMJ Group, you agree that you shall: (a) comply with all applicable laws, statutes, regulations and codes relating to anti-bribery and anti-corruption including but not limited to the Bribery Act 2010 (Relevant Requirements); b) not engage in any activity, practice or conduct which would constitute an offence under sections 1, 2 or 6 of the Bribery Act 2010 (as amended) if such activity, practice or conduct had been carried out in the UK; (c) comply with any Publisher Ethics and Anti-bribery Policy supplied to you from time to time including as contained as follows (Relevant Policies):

<http://group.bmj.com/group/about/corporate/Anti-Bribery%20and%20Corruption%20Policy%20-August%202012.pdf>;

(d) promptly report to the Chief Executive Officer or Chairman of the Publisher any request or demand for any undue financial or other advantage of any kind received by you in connection with the performance of this Agreement; Breach of this Clause shall be deemed a material breach of this Agreement.

### Law and Jurisdiction

To the fullest extent permitted by law, this Agreement will be governed by the laws of England and shall be governed and construed in accordance with the laws of England whose courts shall have exclusive jurisdiction, unless as at the date of formation of this Agreement either i) an English judgement could not be enforced in the Corresponding Author's stated country location; or ii) it would take six months or more for the BMJ Group to enforce an English judgement in the Corresponding Author's stated country location, then it is hereby agreed that this Agreement shall be governed by the laws of the Corresponding Author's stated country (or state if applicable) and their courts shall have jurisdiction. Notwithstanding any of the above, this clause is governed by the laws of England.

### The following statement must be included in your manuscript, together with the relevant tick box line below:

"I *Proton Rahman* The Corresponding Author of this article contained within the original manuscript which includes any diagrams & photographs within and any related or stand alone film submitted (the Contribution") has the right to grant on behalf of all authors and does grant on behalf of all authors, a licence to the BMJ Publishing Group Ltd and its licencees, to permit this Contribution (if accepted) to be published in the BMJ and any other BMJ Group products and to exploit all subsidiary rights, as set out in our licence set out at: <http://www.bmj.com/about-bmj/resources-authors/forms-policies-and-checklists/copyright-open-access-and-permission-reuse>."

IF YOU ARE A NATIONAL INSTITUTE OF HEALTH ("NIH") EMPLOYEE, CONTRACTOR OR TRAINEE the following cover sheet will be accepted by the BMJ Group and NIH and incorporated into the above Licence.

Please tick **one or more** boxes as appropriate:

- I am the sole author of the Contribution.
- I am one author signing on behalf of all co-owners of the Contribution.
- The Contribution has been made in the course of my employment and I am signing as authorised by my employer.
- I am a US Federal Government employee acting in the course of my employment.
- I am not a US Federal Government employee, but some or all of my co-authors are.
- I am an employee of the UK Crown\* acting in the course of my employment
- I am a US Federal Government employee acting in the course of my employment.
- I am not a US Federal Government employee, but some or all of my co-authors are.
- I am an employee of the UK Crown acting in the course of my employment
- I am not an employee of the UK Crown acting in the course of my employment but some/all of my co-authors are.\*

\*Such authors should consult guidance and if necessary return any completed form.

1  
2  
3  
4  
5  
6  
7  
8  
9  
10  
11  
12  
13  
14  
15  
16  
17  
18  
19  
20  
21  
22  
23  
24  
25  
26  
27  
28  
29  
30  
31  
32  
33  
34  
35  
36  
37  
38  
39  
40  
41  
42  
43  
44  
45  
46  
47  
48  
49  
50  
51  
52  
53  
54  
55  
56  
57  
58  
59  
60

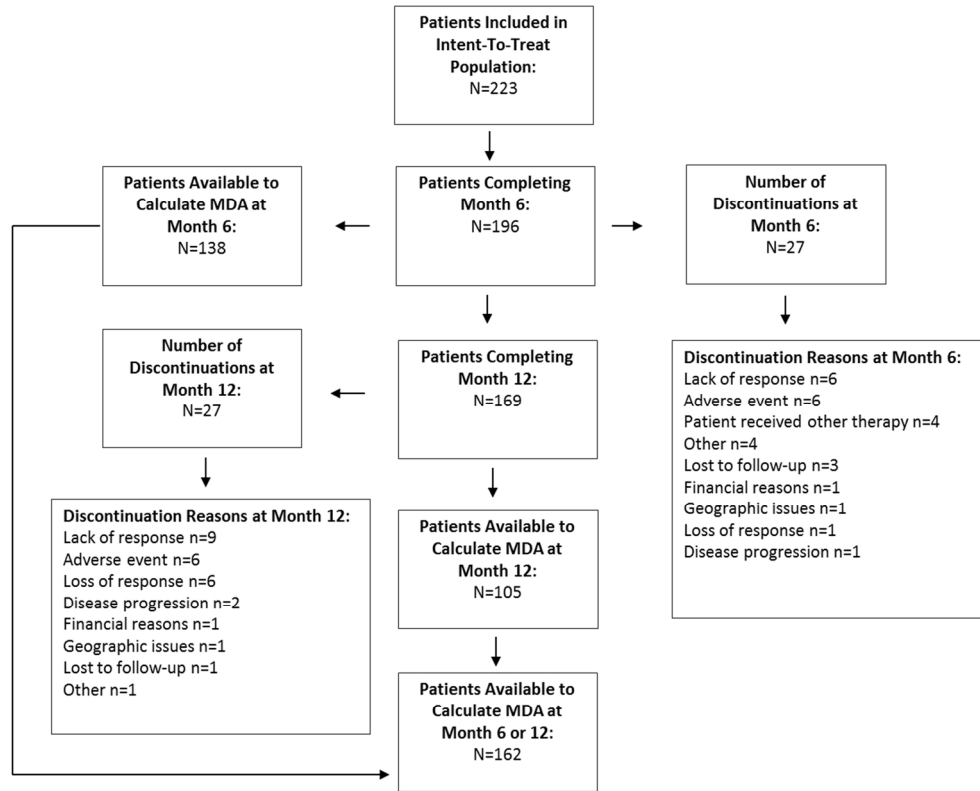

Flow chart of the patient population over time

90x72mm (600 x 600 DPI)

For peer review only

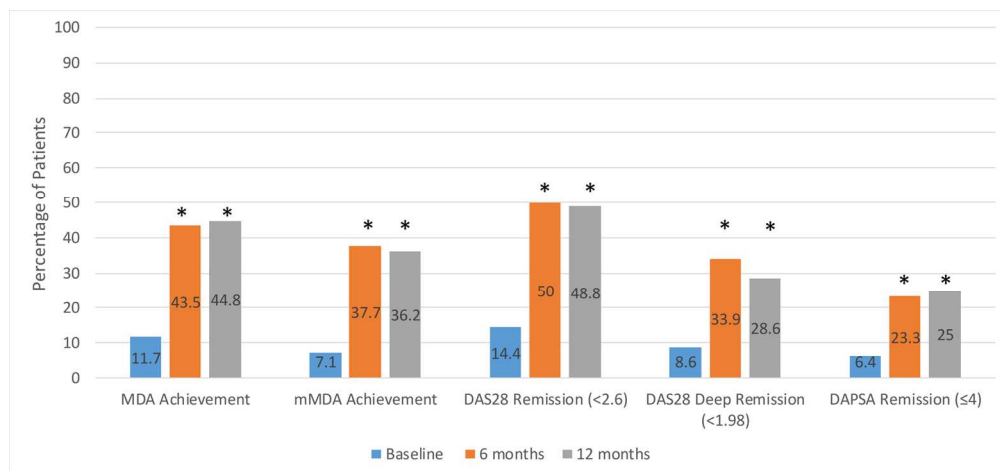

Figure 2. MDA Achievement, mMDA Achievement, DAS28 Remission, DAS28 Deep Remission, and DAPSA Remission over Time

\*The improvement in MDA achievement, mMDA achievement, DAS28 remission, DAS28 deep remission and DAPSA remission from baseline to 6 months and from baseline to 12 months was assessed with the McNemar Test ( $p < 0.001$  for all, except DAS28 deep remission at 12 months  $p = 0.019$ ; and DAPSA remission at 12 months  $p = 0.006$ ).

75x35mm (600 x 600 DPI)

Review only

1  
2  
3  
4  
5  
6  
7  
8  
9  
10  
11  
12  
13  
14  
15  
16  
17  
18  
19  
20  
21  
22  
23  
24  
25  
26  
27  
28  
29  
30  
31  
32  
33  
34  
35  
36  
37  
38  
39  
40  
41  
42  
43  
44  
45  
46  
47  
48  
49  
50  
51  
52  
53  
54  
55  
56  
57  
58  
59  
60

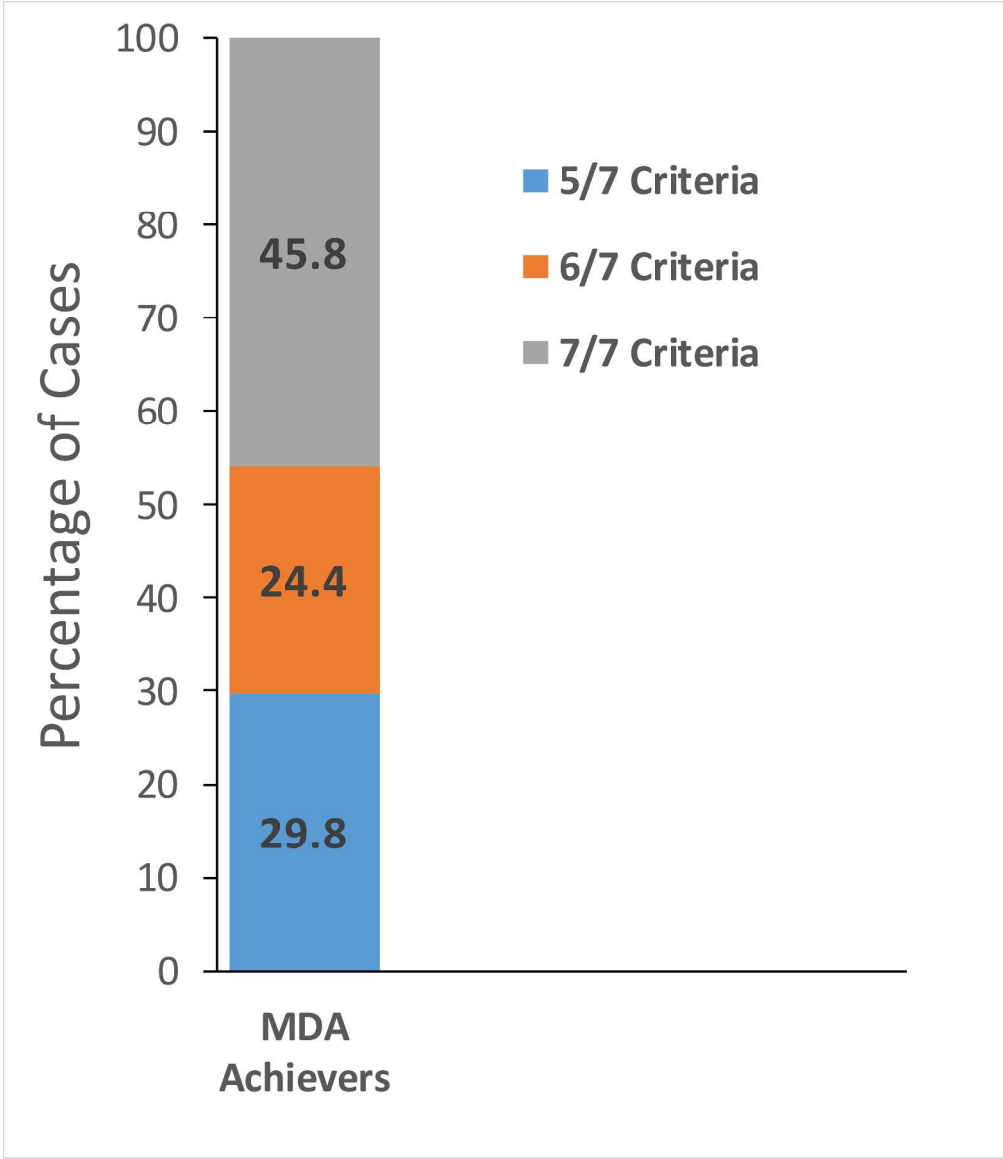

Proportion of Met Criteria among MDA Achievers

134x155mm (600 x 600 DPI)

1  
2  
3  
4  
5  
6  
7  
8  
9  
10  
11  
12  
13  
14  
15  
16  
17  
18  
19  
20  
21  
22  
23  
24  
25  
26  
27  
28  
29  
30  
31  
32  
33  
34  
35  
36  
37  
38  
39  
40  
41  
42  
43  
44  
45  
46  
47  
48  
49  
50  
51  
52  
53  
54  
55  
56  
57  
58  
59  
60

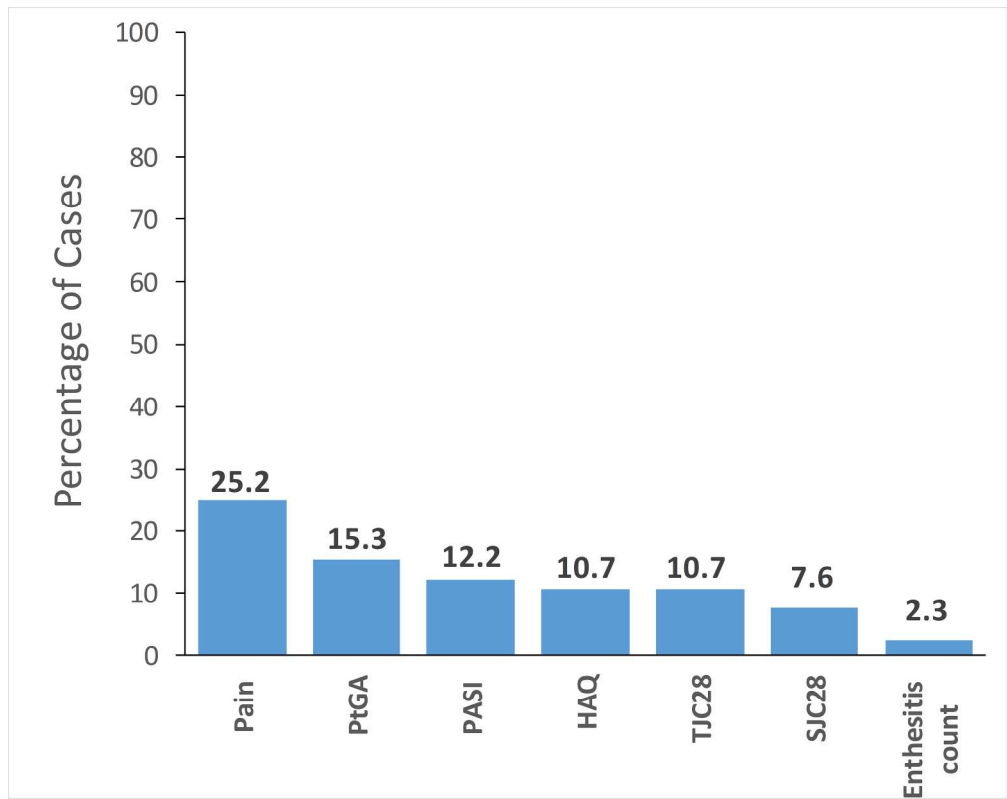

Proportion of Unmet Disease Criteria among MDA Achievers

118x93mm (600 x 600 DPI)

View Only

1  
2  
3  
4  
5  
6  
7  
8  
9  
10  
11  
12  
13  
14  
15  
16  
17  
18  
19  
20  
21  
22  
23  
24  
25  
26  
27  
28  
29  
30  
31  
32  
33  
34  
35  
36  
37  
38  
39  
40  
41  
42  
43  
44  
45  
46  
47  
48  
49  
50  
51  
52  
53  
54  
55  
56  
57  
58  
59  
60

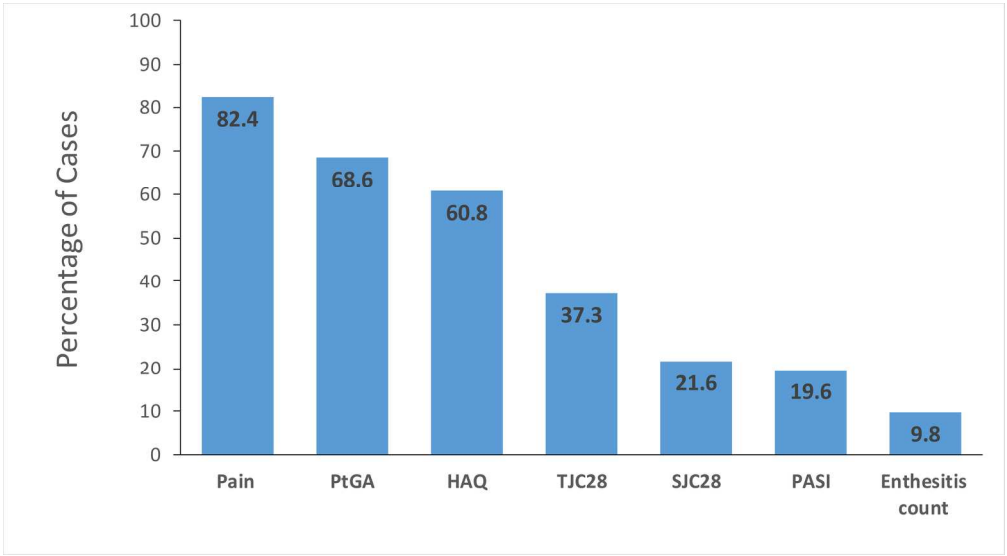

Proportion of Unmet Criteria among New MDA Achievers

99x54mm (600 x 600 DPI)

review only



1  
2  
3  
4  
5  
6  
7  
8  
9  
10  
11  
12  
13  
14  
15  
16  
17  
18  
19  
20  
21  
22  
23  
24  
25  
26  
27  
28  
29  
30  
31  
32  
33  
34  
35  
36  
37  
38  
39  
40  
41  
42  
43  
44  
45  
46  
47  
48  
49

Absolute Improvement from Baseline

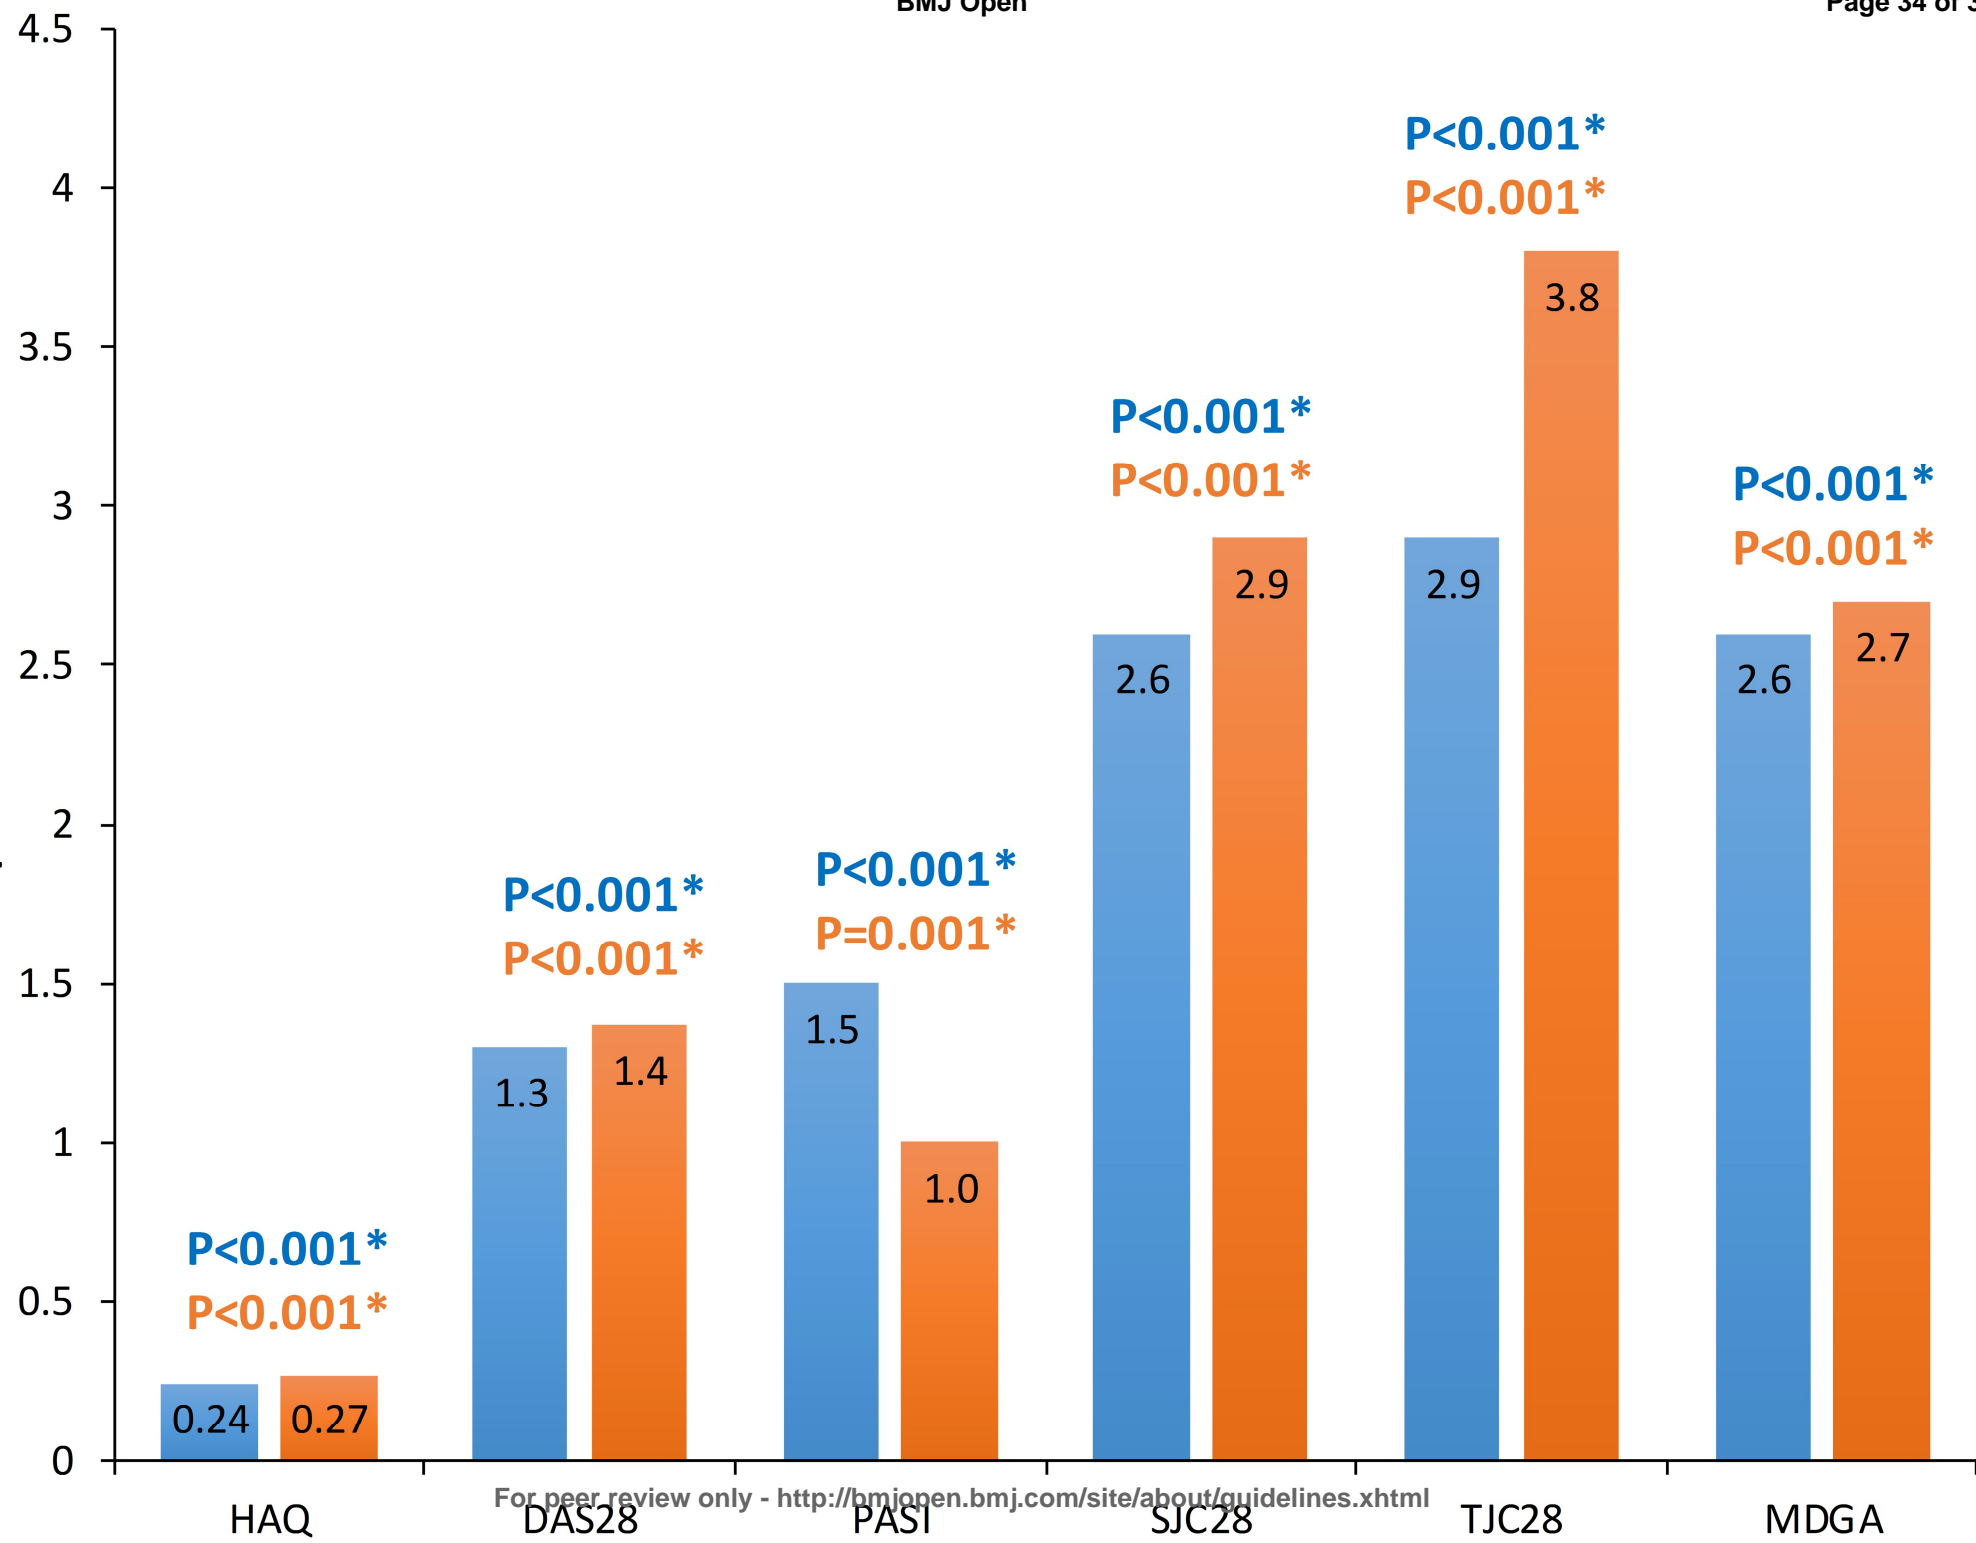

BMJ Open  
6 Months  
12 Months

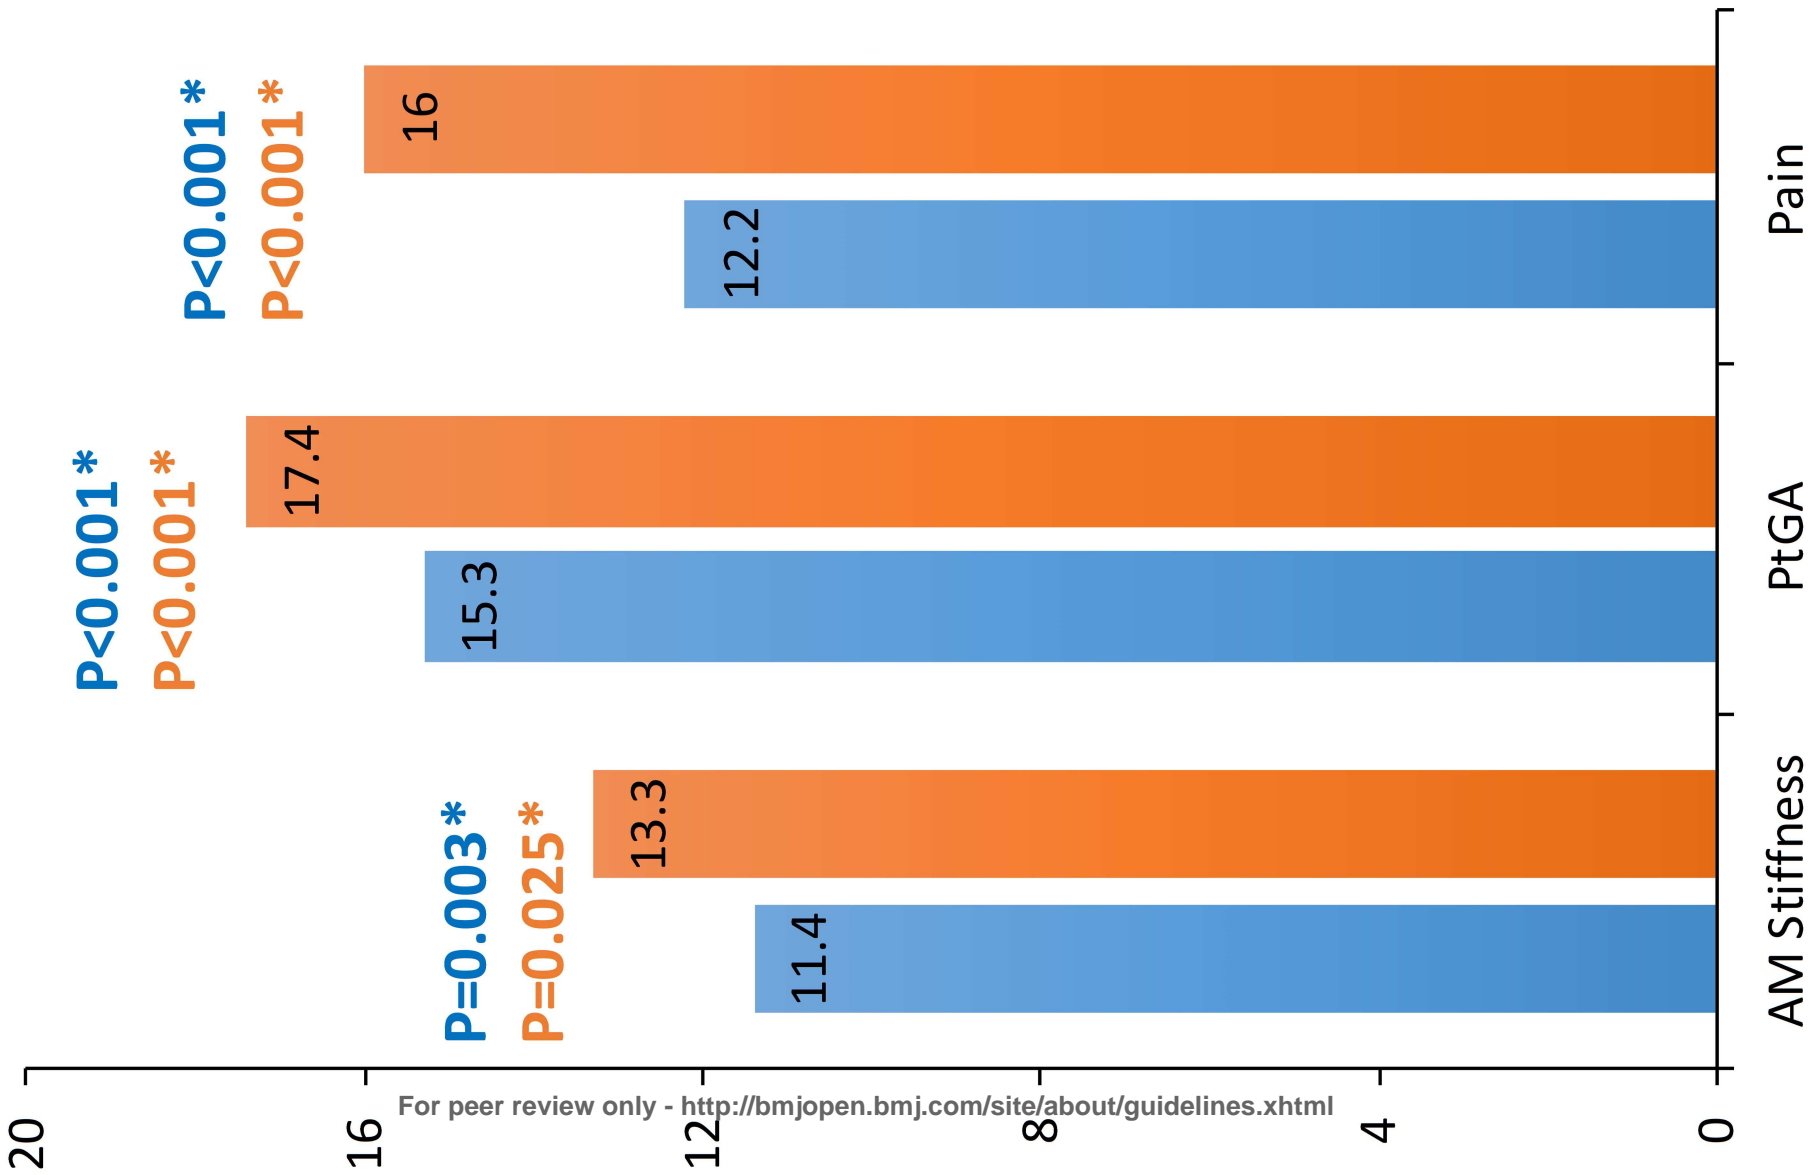

1  
2  
3  
4  
5  
6  
7  
8  
9  
10  
11  
12  
13  
14  
15  
16  
17  
18  
19  
20  
21  
22  
23  
24  
25  
26  
27  
28  
29  
30  
31  
32  
33  
34  
35  
36  
37  
38  
39  
40  
41  
42  
43  
44  
45  
46  
47  
48  
49

## STROBE Statement—checklist of items that should be included in reports of observational studies

|                              | Item No | Recommendation                                                                                                                                                                                                                                                                                                                                                                                                                                                                                                                                                                                                                                                                                   | Page No.                      |
|------------------------------|---------|--------------------------------------------------------------------------------------------------------------------------------------------------------------------------------------------------------------------------------------------------------------------------------------------------------------------------------------------------------------------------------------------------------------------------------------------------------------------------------------------------------------------------------------------------------------------------------------------------------------------------------------------------------------------------------------------------|-------------------------------|
| <b>Title and abstract</b>    | 1       | (a) Indicate the study's design with a commonly used term in the title or the abstract<br>(b) Provide in the abstract an informative and balanced summary of what was done and what was found                                                                                                                                                                                                                                                                                                                                                                                                                                                                                                    | 1<br>3-4                      |
| <b>Introduction</b>          |         |                                                                                                                                                                                                                                                                                                                                                                                                                                                                                                                                                                                                                                                                                                  |                               |
| Background/rationale         | 2       | Explain the scientific background and rationale for the investigation being reported                                                                                                                                                                                                                                                                                                                                                                                                                                                                                                                                                                                                             | 5-6                           |
| Objectives                   | 3       | State specific objectives, including any prespecified hypotheses                                                                                                                                                                                                                                                                                                                                                                                                                                                                                                                                                                                                                                 | 6-7                           |
| <b>Methods</b>               |         |                                                                                                                                                                                                                                                                                                                                                                                                                                                                                                                                                                                                                                                                                                  |                               |
| Study design                 | 4       | Present key elements of study design early in the paper                                                                                                                                                                                                                                                                                                                                                                                                                                                                                                                                                                                                                                          | 7                             |
| Setting                      | 5       | Describe the setting, locations, and relevant dates, including periods of recruitment, exposure, follow-up, and data collection                                                                                                                                                                                                                                                                                                                                                                                                                                                                                                                                                                  | 7-8                           |
| Participants                 | 6       | (a) <i>Cohort study</i> —Give the eligibility criteria, and the sources and methods of selection of participants. Describe methods of follow-up<br><i>Case-control study</i> —Give the eligibility criteria, and the sources and methods of case ascertainment and control selection. Give the rationale for the choice of cases and controls<br><i>Cross-sectional study</i> —Give the eligibility criteria, and the sources and methods of selection of participants<br>(b) <i>Cohort study</i> —For matched studies, give matching criteria and number of exposed and unexposed<br><i>Case-control study</i> —For matched studies, give matching criteria and the number of controls per case | 7-8                           |
| Variables                    | 7       | Clearly define all outcomes, exposures, predictors, potential confounders, and effect modifiers. Give diagnostic criteria, if applicable                                                                                                                                                                                                                                                                                                                                                                                                                                                                                                                                                         | 8                             |
| Data sources/<br>measurement | 8*      | For each variable of interest, give sources of data and details of methods of assessment (measurement). Describe comparability of assessment methods if there is more than one group                                                                                                                                                                                                                                                                                                                                                                                                                                                                                                             | 8                             |
| Bias                         | 9       | Describe any efforts to address potential sources of bias                                                                                                                                                                                                                                                                                                                                                                                                                                                                                                                                                                                                                                        | 7                             |
| Study size                   | 10      | Explain how the study size was arrived at                                                                                                                                                                                                                                                                                                                                                                                                                                                                                                                                                                                                                                                        | 7                             |
| Quantitative variables       | 11      | Explain how quantitative variables were handled in the analyses. If applicable, describe which groupings were chosen and why                                                                                                                                                                                                                                                                                                                                                                                                                                                                                                                                                                     | 8-9                           |
| Statistical methods          | 12      | (a) Describe all statistical methods, including those used to control for confounding<br>(b) Describe any methods used to examine subgroups and interactions<br>(c) Explain how missing data were addressed<br>(d) <i>Cohort study</i> —If applicable, explain how loss to follow-up was addressed<br><i>Case-control study</i> —If applicable, explain how matching of cases and controls was addressed<br><i>Cross-sectional study</i> —If applicable, describe analytical methods taking account of sampling strategy<br>(e) Describe any sensitivity analyses                                                                                                                                | 8-9<br>N/A<br>9<br>N/A<br>N/A |

Continued on next page

1  
2  
3  
4  
5  
6  
7  
8  
9  
10  
11  
12  
13  
14  
15  
16  
17  
18  
19  
20  
21  
22  
23  
24  
25  
26  
27  
28  
29  
30  
31  
32  
33  
34  
35  
36  
37  
38  
39  
40  
41  
42  
43  
44  
45  
46  
47  
48  
49  
50  
51  
52  
53  
54  
55  
56  
57  
58  
59  
60

| <b>Results</b>           |     |                                                                                                                                                                                                                                                                                                                                                                                                               |                                  |
|--------------------------|-----|---------------------------------------------------------------------------------------------------------------------------------------------------------------------------------------------------------------------------------------------------------------------------------------------------------------------------------------------------------------------------------------------------------------|----------------------------------|
| Participants             | 13* | (a) Report numbers of individuals at each stage of study—eg numbers potentially eligible, examined for eligibility, confirmed eligible, included in the study, completing follow-up, and analysed<br>(b) Give reasons for non-participation at each stage<br>(c) Consider use of a flow diagram                                                                                                               | Page 9 & Fig.1<br>Fig.1<br>Fig.1 |
| Descriptive data         | 14* | (a) Give characteristics of study participants (eg demographic, clinical, social) and information on exposures and potential confounders<br>(b) Indicate number of participants with missing data for each variable of interest<br>(c) <i>Cohort study</i> —Summarise follow-up time (eg, average and total amount)                                                                                           | 9<br>8-9<br>11                   |
| Outcome data             | 15* | <i>Cohort study</i> —Report numbers of outcome events or summary measures over time<br><i>Case-control study</i> —Report numbers in each exposure category, or summary measures of exposure<br><i>Cross-sectional study</i> —Report numbers of outcome events or summary measures                                                                                                                             | 11<br>11                         |
| Main results             | 16  | (a) Give unadjusted estimates and, if applicable, confounder-adjusted estimates and their precision (eg, 95% confidence interval). Make clear which confounders were adjusted for and why they were included<br>(b) Report category boundaries when continuous variables were categorized<br>(c) If relevant, consider translating estimates of relative risk into absolute risk for a meaningful time period | 9-13<br>13<br>N/A                |
| Other analyses           | 17  | Report other analyses done—eg analyses of subgroups and interactions, and sensitivity analyses                                                                                                                                                                                                                                                                                                                | N/A                              |
| <b>Discussion</b>        |     |                                                                                                                                                                                                                                                                                                                                                                                                               |                                  |
| Key results              | 18  | Summarise key results with reference to study objectives                                                                                                                                                                                                                                                                                                                                                      | 14-16                            |
| Limitations              | 19  | Discuss limitations of the study, taking into account sources of potential bias or imprecision. Discuss both direction and magnitude of any potential bias                                                                                                                                                                                                                                                    | 15-16                            |
| Interpretation           | 20  | Give a cautious overall interpretation of results considering objectives, limitations, multiplicity of analyses, results from similar studies, and other relevant evidence                                                                                                                                                                                                                                    | 14-16                            |
| Generalisability         | 21  | Discuss the generalisability (external validity) of the study results                                                                                                                                                                                                                                                                                                                                         | 16                               |
| <b>Other information</b> |     |                                                                                                                                                                                                                                                                                                                                                                                                               |                                  |
| Funding                  | 22  | Give the source of funding and the role of the funders for the present study and, if applicable, for the original study on which the present article is based                                                                                                                                                                                                                                                 | 18-19                            |

\*Give information separately for cases and controls in case-control studies and, if applicable, for exposed and unexposed groups in cohort and cross-sectional studies.

**Note:** An Explanation and Elaboration article discusses each checklist item and gives methodological background and published examples of transparent reporting. The STROBE checklist is best used in conjunction with this article (freely available on the Web sites of PLoS Medicine at <http://www.plosmedicine.org/>, Annals of Internal Medicine at <http://www.annals.org/>, and Epidemiology at <http://www.epidem.com/>). Information on the STROBE Initiative is available at [www.strobe-statement.org](http://www.strobe-statement.org).

# BMJ Open

## Real World Validation of the Minimal Disease Activity Index in Psoriatic Arthritis: An Analysis from a Prospective, Observational, Biological Treatment Registry

|                                    |                                                                                                                                                                                                                                                                                                                                                                                                                                                                                                                                                                                                                                                                                                                                                                   |
|------------------------------------|-------------------------------------------------------------------------------------------------------------------------------------------------------------------------------------------------------------------------------------------------------------------------------------------------------------------------------------------------------------------------------------------------------------------------------------------------------------------------------------------------------------------------------------------------------------------------------------------------------------------------------------------------------------------------------------------------------------------------------------------------------------------|
| Journal:                           | <i>BMJ Open</i>                                                                                                                                                                                                                                                                                                                                                                                                                                                                                                                                                                                                                                                                                                                                                   |
| Manuscript ID                      | bmjopen-2017-016619.R2                                                                                                                                                                                                                                                                                                                                                                                                                                                                                                                                                                                                                                                                                                                                            |
| Article Type:                      | Research                                                                                                                                                                                                                                                                                                                                                                                                                                                                                                                                                                                                                                                                                                                                                          |
| Date Submitted by the Author:      | 08-Jun-2017                                                                                                                                                                                                                                                                                                                                                                                                                                                                                                                                                                                                                                                                                                                                                       |
| Complete List of Authors:          | Rahman, Proton; Memorial University of Newfoundland, Medicine<br>Zummer, Michel; Hôpital Maisonneuve-Rosemont<br>Bessette, Louis; Centre de Recherche du CHU de Québec<br>Baer, Philip; Private practice<br>Haraoui, Boulos; Centre Hospitalier de l'Université de Montréal<br>Chow, Andrew; Credit Valley Rheumatology,<br>Kelsall, John; Saint Paul's Hospital<br>Kapur, Suneil; University of Ottawa<br>Rampakakis, Emmanouil; JSS Medical Research Inc., Scientific Affairs<br>Psaradellis, Eliofotisti; JSS Medical Research Inc., Scientific Affairs<br>Lehman, Allen; Janssen Inc., Medical Affairs<br>Nantel, Francois; Janssen Inc., Medical Affairs<br>Osborne, Brendan; Janssen Inc., Medical Affairs<br>Tkaczyk, Cathy; Janssen Inc., Medical Affairs |
| <b>Primary Subject<br>Heading</b>: | Rheumatology                                                                                                                                                                                                                                                                                                                                                                                                                                                                                                                                                                                                                                                                                                                                                      |
| Secondary Subject Heading:         | Epidemiology, Evidence based practice, Rheumatology                                                                                                                                                                                                                                                                                                                                                                                                                                                                                                                                                                                                                                                                                                               |
| Keywords:                          | RHEUMATOLOGY, Clinical trials < THERAPEUTICS, EPIDEMIOLOGY,<br>PRIMARY CARE, STATISTICS & RESEARCH METHODS                                                                                                                                                                                                                                                                                                                                                                                                                                                                                                                                                                                                                                                        |
|                                    |                                                                                                                                                                                                                                                                                                                                                                                                                                                                                                                                                                                                                                                                                                                                                                   |

SCHOLARONE™  
Manuscripts

1  
2  
3 **Real World Validation of the Minimal Disease Activity Index in Psoriatic Arthritis: An**  
4  
5 **Analysis from a Prospective, Observational, Biological Treatment Registry**  
6  
7  
8

9  
10 **Corresponding Author:**

11 Full name: Proton Rahman

12 Postal address: Memorial University of Newfoundland, 230 Elizabeth Avenue, St. John's, NF  
13 A1B 3X9, Canada  
14

15 E-mail: [prahman@mun.ca](mailto:prahman@mun.ca)  
16  
17

18  
19  
20  
21 **Authors:**

22 Rahman P: Associate Dean, Clinical Research, Memorial University of Newfoundland, 230  
23 Elizabeth Avenue, St. John's, NF, A1B 3X9, Canada

24 Zimmer M: Head of Rheumatology, Hôpital Maisonneuve-Rosemont, 5415 Boulevard de  
25 l'Assomption, Montréal, QC, H1T 2M4, Canada

26 Bessette L: Rheumatologist, Centre de Recherche du CHU de Québec, 2325 rue de l'Université,  
27 Québec, QC, G1V 0A6, Canada

28 Baer P: Rheumatologist, Private Practice, 1333 Neilson Rd, Scarborough, ON, M1B 4Y9,  
29 Canada

30 Haraoui B: Rheumatologist, Centre Hospitalier de l'Université de Montréal, 1000 Rue Saint-  
31 Denis, Montréal, QC, H2X 3J4, Canada

32 Chow A: Rheumatologist, Credit Valley Rheumatology, 2000 Credit Valley Rd, Mississauga,  
33 ON, L5M 4N4, Canada

34 Kelsall J: Clinical Associate Professor, Saint Paul's Hospital, 1081 Burrard St, Vancouver, BC,  
35 V6Z 1Y6, Canada

36 Kapur S: Rheumatologist, University of Ottawa, 75 Laurier Ave E, Ottawa, ON, K1N 6N5,  
37 Canada

38 Rampakakis E: Vice President of Scientific Affairs, JSS Medical Research Inc., 9400 Henri-  
39 Bourassa O, St-Laurent, QC, H4S 1N8, Canada

40 Psaradellis E: Scientific Advisor, JSS Medical Research Inc., 9400 Henri-Bourassa O, St-  
41 Laurent, QC, H4S 1N8, Canada  
42  
43  
44  
45  
46  
47  
48  
49  
50  
51  
52  
53  
54  
55  
56  
57  
58  
59  
60

1  
2  
3 Lehman AJ: Medical & Scientific Liaison – Rheumatology, Western Canada, Janssen Inc., 19  
4 Green Belt Dr, Toronto, ON, M3C 1L9, Canada

5  
6  
7 Nantel F: Director, Medical Affairs – Rheumatology, Janssen Inc., 19 Green Belt Dr, Toronto,  
8 ON, M3C 1L9, Canada

9  
10 Osborne B: Medical and Scientific Liaison – Rheumatology, Janssen Inc., 19 Green Belt Dr,  
11 Toronto, ON, M3C 1L9, Canada

12  
13 Tkaczyk C: Medical and Scientific Liaison – Medical Affairs, Janssen Inc., 19 Green Belt Dr,  
14 Toronto, ON, M3C 1L9, Canada  
15  
16

17  
18  
19  
20  
21 Word count (excluding title page, abstract, references, figures and tables): 2,850 words  
22  
23  
24  
25  
26  
27  
28  
29  
30  
31  
32  
33  
34  
35  
36  
37  
38  
39  
40  
41  
42  
43  
44  
45  
46  
47  
48  
49  
50  
51  
52  
53  
54  
55  
56  
57  
58  
59  
60

1  
2  
3 **Key words:** Psoriatic arthritis, minimal disease activity, registry, real world, infliximab,  
4 golimumab  
5  
6  
7  
8  
9

### 10 **Structured Abstract**

11 **Objectives:** To describe the minimal disease activity (MDA) rate over time in psoriatic arthritis  
12 (PsA) patients receiving anti-TNF agents, evaluate prognostic factors of MDA achievement, and  
13 identify the most common unmet criteria among MDA achievers.  
14  
15  
16  
17

18 **Design:** Biologic Treatment Registry Across Canada (BioTRAC): ongoing, prospective registry  
19 of patients initiating treatment for rheumatoid arthritis, ankylosing spondylitis, or PsA with  
20 Infliximab (IFX), Golimumab (GLM) or ustekinumab.  
21  
22  
23  
24  
25  
26

27 **Setting:** 46 primary-care Canadian rheumatology practices.  
28

29 **Participants:** 223 PsA patients receiving IFX (enrolled since 2005) and GLM (enrolled since  
30 2010) with available MDA information at baseline, 6 months, and/or 12 months.  
31  
32  
33

34 **Primary and secondary outcome measures:** MDA was defined as  $\geq 5$  of the following criteria:  
35 Tender Joint Count (TJC)-28  $\leq 1$ , Swollen Joint Count (SJC)-28  $\leq 1$ , Psoriasis Area Severity  
36 Index (PASI)  $\leq 1$ , or Body Surface Area  $\leq 3$ , Pain (VAS)  $\leq 15$ mm, Patient's global assessment  
37 (PtGA) (VAS)  $\leq 20$ mm, HAQ  $\leq 0.5$ , tender enthesal points  $\leq 1$ . Independent prognostic factors of  
38 MDA achievement were assessed with multivariate logistic regression.  
39  
40  
41  
42  
43  
44

45 **Results:** MDA was achieved by 11.7% of patients at baseline, 43.5% at 6 months, 44.8% at 12  
46 months, and 48.8% at either 6 or 12 months. Among MDA achievers at 6 months, 75.7%  
47 sustained MDA at 12 months. Lower baseline HAQ (OR=0.210; 95% CI: 0.099-0.447) and  
48 lower TJC28 (OR=0.880; 95% CI: 0.804-0.964), were significant prognostic factors of MDA  
49 achievement over 12 months of treatment. The most commonly unmet MDA criteria among  
50 MDA achievers was patient reported pain (25%), PtGA (15%) and PASI (12%).  
51  
52  
53  
54  
55  
56  
57  
58  
59  
60



1  
2  
3 **Conclusions:** Almost 50% of patients treated with IFX or GLM in routine clinical care achieve  
4 MDA within the first year of treatment. Lower baseline HAQ and lower TJC28, were identified  
5 as significant prognostic factors of MDA achievement. The most commonly unmet criteria in  
6 patients who achieved MDA were pain, PtGA and PASI.  
7  
8  
9

10  
11  
12 **Trial Registration:** NCT00741793, “Biologic Treatment Registry Across Canada (BioTRAC)”  
13  
14

15  
16  
17 **Strengths and limitations of this study:**  
18

- 19 • The limitations in the current study are that the peripheral joint activity was measured  
20 using the 28 tender/swollen joint count although the Outcome Measures in Rheumatology  
21 Clinical Trials (OMERACT) recommends the measure of 68 tender/66 swollen joint  
22 counts.  
23
- 24 • Furthermore, although several approaches were used to assess disease activity,  
25 radiographic images are not collected in BioTRAC, therefore not allowing the  
26 examination of radiographic progression.  
27
- 28 • There is also potential bias given the observational nature of the study, a bias that is  
29 avoided when using data from clinical trials.  
30
- 31 • The strength of the study is that patients were seen in a real world setting by Canadian  
32 rheumatologists during routine clinical practice which enhances the generalizability of  
33 the results to the target population.  
34  
35  
36  
37  
38  
39  
40  
41  
42  
43  
44  
45  
46  
47  
48  
49  
50  
51  
52  
53  
54  
55  
56  
57  
58  
59  
60

## INTRODUCTION

Psoriatic arthritis (PsA) is a chronic systemic inflammatory musculoskeletal disease characterized by synovitis, axial disease, enthesitis, or dactylitis, and psoriasis. It is variably associated with other extra-articular manifestations that affects women and men equally.[1] PsA also affects up to 30 to 40% of patients with psoriasis.[2] Previously PsA was considered a mild disease; however, evidence from the last two decades has shown that it is frequently an erosive and deforming in 40 to 60% of patients who are diagnosed within the first few years.[3-5] Furthermore, similarly to other rheumatic diseases such as rheumatoid arthritis (RA), PsA has been associated with impaired physical function, reduced quality of life, and increased mortality,[6-8] with about 20% of patients eventually developing a highly destructive and disabling form of PsA.[9] Manifestations of PsA contribute to disease burden due to the negative effects on the patient's psychological and psychosocial functioning, dissatisfaction with the management of the disease and the negative impact on daily living activities.[10]

Over the years, major clinical improvements have been achieved in the outcome of inflammatory rheumatic diseases due to improved treatment availability and more commonly adopted early treatment algorithms including the treat to target strategy which has become the standard of care for newly diagnosed patients in RA.[11,12] Treatment therapies in PsA such as tumor necrosis factor  $\alpha$  blockers (anti TNF  $\alpha$ ), have demonstrated a reduction in disease activity and radiographic progression of joint damage.[13-15] Although remission remains the ultimate treatment goal, the complexity of PsA makes it difficult to identify valid criteria that mark a state of remission or low disease activity that take into account all dimensions of the clinical manifestations of the disease. In the past decades, different scores were used to evaluate the disease severity of PsA such as the Disease Activity Score using 28 joints (DAS28) originally developed for RA assessment, as well as the Psoriatic Arthritis Disease Activity Score

1  
2  
3 (PASDAS), a weighted index comprising assessments of joints, function, acute-phase response,  
4 quality of life (QOL), and patient and physician global VAS scores, and the Composite Psoriatic  
5 Disease Activity Index (CPDAI) which takes into account the assessment of different domains  
6 such as peripheral arthritis, skin disease, spinal disease, dactylitis, and enthesitis. The minimal  
7 disease activity (MDA) was developed to take into account the heterogeneity seen and measure  
8 the disease activity of several clinical domains which is a more suitable outcome measure  
9 compared to DAS28 which does not take into consideration the full spectrum of disease  
10 manifestations.[16] These MDA criteria were validated in randomized controlled trials and  
11 observational studies demonstrating that patients who achieved MDA for a period of 12 months  
12 or more experienced a reduction in radiographic joint damage progression.[17,18] The tight  
13 control of inflammation in early psoriatic arthritis (TICOPA) trial was the first randomised,  
14 controlled trial, with a treat to target approach in PsA patients where the tight control group were  
15 reviewed every 4 weeks with escalation of treatment if MDA criteria wasn't met. Patients in the  
16 tight control group showed significant improvements in joint and skin disease activity, as well as  
17 benefits in function and QOL compared to the standard of care group.[19] However as far as we  
18 know, no real world evidence data on MDA are available in the literature.

19  
20  
21  
22  
23  
24  
25  
26  
27  
28  
29  
30  
31  
32  
33  
34  
35  
36  
37  
38  
39  
40  
41 The aim of the current study is to 1) describe the rate of MDA achievement over time, 2)  
42 evaluate prognostic factors of MDA achievement, 3) assess which unmet criteria were more  
43 common among patients who achieved MDA, 4) evaluate which unmet criteria were more  
44 common among patients who were near MDA achievers, and 5) assess DAS28 remission,  
45 DAS28 deep remission, and the level of agreement between MDA and DAS28 remission in PsA  
46 patients treated with infliximab or golimumab, in a routine clinical practice setting. The analysis  
47 was done using data from the Biologic Treatment Registry Across Canada (BioTRAC), an  
48  
49  
50  
51  
52  
53  
54  
55  
56  
57  
58  
59  
60

1  
2  
3 ongoing, community based, Canada-wide, multi-centre, prospective, observational registry of  
4  
5 patients with inflammatory arthritis.  
6  
7  
8  
9

## 11 **METHODS**

### 13 **Study design**

15 BioTRAC is an ongoing Canadian multi-centre, prospective, observational registry collecting  
16  
17 real world clinical, laboratory, patient-centric, and safety data in rheumatoid arthritis, ankylosing  
18  
19 spondylitis, and psoriatic arthritis patients treated with infliximab (IFX), golimumab (GLM), or  
20  
21 ustekinumab as part of their routine care. The historical development of the registry has been  
22  
23 described by Thorne et al.[20] To date there are over 100 rheumatology sites, participating, both  
24  
25 in an institutional and private setting, with over 2100 patients enrolled in the programme across  
26  
27 all indications. In accordance with the observational nature of the registry, there is no protocol-  
28  
29 defined intervention in patient management. All clinical decisions and treatments are based on  
30  
31 routine practice and the judgement of the treating physicians. Patients provided written informed  
32  
33 consent prior to participation in the study. Ethics approval for participation in the BioTRAC  
34  
35 program was obtained from the respective Research Ethics Boards (REB) of participating  
36  
37 institutional sites and a Central Institutional Review Board (IRB Services, Ontario Canada) for  
38  
39 private practice sites. BioTRAC is conducted according to the tenets of the Declaration of  
40  
41 Helsinki.  
42  
43  
44  
45  
46  
47

### 48 **Study population**

50 Biologic-naïve patients or patients previously treated with one biologic who are eligible for  
51  
52 treatment with infliximab, golimumab, or ustekinumab as per their respective Canadian Product  
53  
54 Monograph are considered for inclusion in the registry. For the purpose of the current analysis,  
55  
56 223 patients with PsA treated with infliximab (enrolled since 2005) or with golimumab (enrolled  
57  
58  
59  
60

1  
2  
3 since 2010) were included from 46 primary care rheumatology practices across Canada. All  
4 efficacy analyses were observed and included all enrolled PsA patients who received at least one  
5  
6 dose of IFX or GLM, and had at least one follow up assessment with available MDA data at 6 or  
7  
8  
9  
10  
11 12 months. Figure 1 represents the flow chart of the patient population over time.

### 12 13 **Data collection**

14 The following clinical/laboratory parameters and patient reported outcomes (PROs) are collected  
15  
16 as per routine care at baseline and at all follow up visits, with suggested assessments every six  
17  
18 months given that this is within acceptable practice patterns for patients with active PsA:  
19  
20 morning (AM) stiffness, swollen joint count (SJC28), tender joint count (TJC28), patient's  
21  
22 (PtGA), and physician's (MDGA) global assessment of disease activity, health assessment  
23  
24 questionnaire (HAQ), patient's assessment of pain, C-reactive protein (CRP), and erythrocyte  
25  
26 sedimentation rate (ESR).  
27  
28  
29  
30

### 31 32 **Statistical Analysis**

33 Descriptive statistics included mean and standard deviations for continuous variables, and  
34  
35 proportions for categorical variables. The absolute improvement in disease parameters at 6 and  
36  
37 12 months of treatment was assessed with the non-parametric Wilcoxon Signed Ranks test, while  
38  
39 between group differences for continuous and categorical variables were assessed with the non-  
40  
41 parametric Kruskal-Wallis test and the Pearson Chi-square test, respectively. The improvement  
42  
43 in MDA achievement, DAS28 remission (<2.6), and DAS28 deep remission (<1.98) over time  
44  
45 was assessed for statistical significance with the McNemar test. Independent prognostic factors  
46  
47 of MDA achievement at 6 or 12 months of treatment were assessed with backward conditional  
48  
49 logistic regression; covariates considered were: province, gender, age, baseline biologic agent,  
50  
51 MDGA, PtGA, pain, HAQ, SJC28, TJC28, and enthesitis count with probability for stepwise  
52  
53 entry and removal at the 0.05 and 0.10 level, respectively. MDA was defined as the fulfillment of  
54  
55  
56  
57  
58  
59  
60

1  
2  
3  $\geq 5$  of the following criteria: TJC28 $\leq 1$ , SJC28 $\leq 1$ , PASI $\leq 1$ , pain (VAS)  $\leq 15$  mm, PtGA (VAS)  
4  $\leq 20$  mm, HAQ $\leq 0.5$ , tender enthesal points  $\leq 1$ . [18] Modified MDA (mMDA) was defined as  
5  
6 having skin and swollen joints as mandatory criteria of the 5/7 criteria. Near MDA was defined  
7  
8 as fulfillment of 4/7 criteria. Patients with missing information included gender (n=21), age  
9  
10 (n=89), disease duration (n=76), while baseline parameters for DAS28 (n=49), MDGA (n=31),  
11  
12 CRP (n=51), ESR (n=48), AM stiffness (n=34), and TJC28, SJC28, PtGA, HAQ, pain, PASI (all,  
13  
14 n=27). Furthermore 12%, 30%, and 38% of patients had missing MDA at baseline, 6 and 12-  
15  
16 month follow-up, respectively (see Figure 1). DAPSA was defined as the sum of TJC28, SJC28,  
17  
18 CRP (mg/dl), PtGA (VAS 0-10) and pain (VAS 0-10). There was no imputation of missing data  
19  
20 in the current analysis. Statistical analyses were conducted with SPSS 21.0 (SPSS Inc., Chicago,  
21  
22 IL).  
23  
24  
25  
26  
27  
28  
29

## 30 RESULTS

31  
32 Table 1 summarizes the patient demographics and characteristics by region at baseline. There  
33  
34 were 130 (58.3%) and 93 (41.7%) patients on GLM and IFX, respectively. Mean (SD) age and  
35  
36 disease duration was 49.8 (11.1) and 5.4 (6.3) years, respectively, and 45.3% were males.  
37  
38 Baseline disease parameters for DAS28, TJC, SJC, pain, PtGA, MDGA, morning stiffness,  
39  
40 HAQ, CRP, and ESR were statistically comparable at baseline among Canadian regions.  
41  
42 However significant differences between regional groups were observed at baseline for mean  
43  
44 (SD) disease duration (p=0.002), enthesitis count [Western: 6.8 (3.3), Ontario: 4.6 (4.2), Quebec:  
45  
46 3.4 (2.1), Maritime: 5.8 (3.6); p=0.012], and PASI [Western: 3.8 (4.2), Ontario: 3.7 (5.4),  
47  
48 Quebec: 1.4 (2.9), Maritime: 1.2 (1.5); p<0.001]. Furthermore, use of a previous biologic  
49  
50 (p=0.017), previous DMARD (p=0.047), previous corticosteroid (p=0.006) and concomitant  
51  
52  
53  
54  
55  
56  
57  
58  
59  
60

methotrexate use (p=0.031) showed significant between group differences among regions (Table 1).

**Table 1. Demographics and disease characteristics by region at baseline**

| Parameter                            | Western<br>(N=18) | Ontario<br>(N=111) | Quebec<br>(N=63) | Maritimes<br>(N=31) | p-value | Total<br>(N=223) |
|--------------------------------------|-------------------|--------------------|------------------|---------------------|---------|------------------|
| <b>Socio-demographics</b>            |                   |                    |                  |                     |         |                  |
| Gender, n (%)                        |                   |                    |                  |                     |         |                  |
| Male                                 | 5 (27.8)          | 44 (39.6)          | 35 (55.6)        | 17 (54.8)           | 0.107   | 101 (45.3)       |
| Female                               | 8 (44.4)          | 58 (52.3)          | 25 (39.77)       | 10 (32.3)           |         | 101 (45.3)       |
| Missing                              | 5 (27.8)          | 9 (8.1)            | 3 (4.8)          | 4 (12.9)            |         | 21 (9.4)         |
| Age (years), mean (SD)               | 50.7 (14.6)       | 49.7 (10.7)        | 51.0 (11.6)      | 46.5 (9.9)          | 0.393   | 49.8 (11.1)      |
| <b>Disease Parameters, mean (SD)</b> |                   |                    |                  |                     |         |                  |
| Disease duration (years)             | 4.0 (4.6)         | 5.4 (6.2)          | 7.5 (7.4)        | 1.9 (2.0)           | 0.002   | 5.4 (6.3)        |
| DAS28                                | 4.3 (0.8)         | 4.4 (1.7)          | 4.2 (1.3)        | 4.3 (1.8)           | 0.928   | 4.3 (1.6)        |
| TJC28                                | 8.1 (6.4)         | 7.1 (6.7)          | 5.8 (5.0)        | 9.0 (9.2)           | 0.555   | 7.0 (6.7)        |
| SJC28                                | 4.1 (3.8)         | 4.6 (4.7)          | 5.2 (4.1)        | 5.0 (5.1)           | 0.549   | 4.8 (4.5)        |
| MDGA (VAS cm)                        | 6.0 (2.1)         | 5.1 (2.4)          | 5.5 (2.3)        | 4.6 (1.4)           | 0.062   | 5.2 (2.2)        |
| PtGA (VAS mm)                        | 54.5 (27.1)       | 52.0 (28.3)        | 49.5 (22.2)      | 46.0 (25.6)         | 0.662   | 50.5 (26.1)      |
| AM stiffness <sup>a</sup> (min)      | 54.6 (49.2)       | 48.1 (47.6)        | 35.5 (39.8)      | 49.1 (43.3)         | 0.237   | 45.0 (45.0)      |
| HAQ                                  | 1.3 (0.5)         | 1.1 (0.7)          | 1.1 (0.6)        | 1.0 (0.7)           | 0.263   | 1.1 (0.7)        |
| Pain (VAS mm)                        | 47.9 (23.0)       | 49.2 (27.5)        | 48.4 (23.0)      | 40.7 (23.6)         | 0.492   | 47.6 (25.4)      |
| PASI                                 | 3.8 (4.2)         | 3.7 (5.4)          | 1.4 (2.9)        | 1.2 (1.5)           | <0.001  | 2.6 (4.4)        |
| Enthesitis count <sup>b</sup>        | 6.8 (3.3)         | 4.6 (4.2)          | 3.4 (2.1)        | 5.8 (3.6)           | 0.012   | 4.9 (3.5)        |
| ESR (mm/h)                           | 14.0 (15.3)       | 22.5 (22.9)        | 19.4 (16.4)      | 19.0 (22.3)         | 0.566   | 20.7 (20.7)      |
| CRP (mg/L)                           | 12.4 (13.6)       | 17.7 (36.9)        | 10.7 (14.2)      | 14.1 (27.6)         | 0.952   | 14.7 (29.1)      |
| <b>Medications, n (%)</b>            |                   |                    |                  |                     |         |                  |
| <b>Baseline Biologic Agent</b>       |                   |                    |                  |                     |         |                  |

|                                |           |           |           |           |       |            |
|--------------------------------|-----------|-----------|-----------|-----------|-------|------------|
| GLM                            | 8 (44.4)  | 69 (62.2) | 39 (61.9) | 14 (45.2) | 0.200 | 130 (58.3) |
| IFX                            | 10 (55.6) | 42 (37.8) | 24 (38.1) | 17 (54.8) |       | 93 (41.7)  |
| Previous biologic              | 3 (16.7)  | 5 (4.5)   | 10 (15.9) | 7 (22.6)  | 0.012 | 25 (11.2)  |
| Previous DMARD                 | 12 (66.7) | 59 (53.2) | 47 (74.6) | 21 (67.7) | 0.036 | 139 (62.3) |
| Previous corticosteroid        | 6 (33.3)  | 17 (15.3) | 21 (33.3) | 3 (9.7)   | 0.008 | 47 (21.1)  |
| Concomitant DMARD              | 11 (61.1) | 52 (46.8) | 40 (63.5) | 19 (61.3) | 0.135 | 122 (54.7) |
| Concomitant Methotrexate       | 4 (22.2)  | 43 (38.7) | 35 (55.6) | 16 (51.6) | 0.031 | 98 (43.9)  |
| Concomitant corticosteroid use | 1 (5.6)   | 10 (9.0)  | 7 (11.1)  | 2 (6.5)   | 0.837 | 20 (9.0)   |

<sup>a</sup>Capped at 120 minutes.

<sup>b</sup>Among patients with enthesitis.

DAS28, Disease Activity Score; HAQ, Health assessment questionnaire; MDGA, Physician Global Assessment of Disease Activity; PASI, Psoriasis Area and Severity Index; PtGA, Patient Global Assessment of Disease Activity; SJC, Swollen joint count; TJC, Tender joint count; GLM, golimumab; IFX, infliximab.

All disease parameters showed statistically significant improvement over time from baseline to month 6 and month 12 ( $p < 0.05$ ) (Supplementary Figure 1).

Figure 2 describes achievement of MDA, mMDA, DAS28 remission, DAS28 deep remission, and DAPSA remission over time. At baseline, 6, and 12 months of treatment, 11.7%, 43.5%, and 44.8% of patients achieved MDA, respectively, while 48.8% achieved MDA at 6 or 12 months. Additionally, 34.6% ( $n=28/81$ ) achieved MDA at both 6 and 12 months of treatment (overall sustained MDA). Patients achieving mMDA at baseline, 6 and 12 months was 7.1%, 37.7%, and 36.2%, respectively. DAS28 remission ( $< 2.6$ ) was achieved by 14.4%, 50.0%, and 48.8% of patients, DAS28 deep remission ( $< 1.98$ ) by 8.6%, 33.9%, and 28.6%, and DAPSA remission ( $\leq 4$ ), by 6.4%, 23.3%, and 25.0% at baseline, 6 months, and 12 months of treatment, respectively (Figure 2). The improvement in MDA achievement, DAS28 remission, and DAS28 deep remission from baseline to 6 months and 12 months was statistically significant for all measures of disease activity ( $p < 0.05$ ). Table 2 depicts sensitivity, specificity, positive and negative predictive values between MDA or mMDA and DAS28 remission, DAS28 deep remission, as well as DAPSA remission. There was substantial agreement between MDA and



DAS28 remission as well as MDA and DAPSA remission with a Kappa measure of agreement of 0.653 and 0.652, respectively (both  $p < 0.001$ ) while that between MDA and DAS28 deep remission showed moderate agreement with 0.598 ( $p < 0.001$ ). Similar results were observed for the association of mMDA with the relevant outcome measures.

**Table 2. Agreement between MDA or mMDA, with DAS28 and DAPSA**

| Diagnostic Criteria Definitions | DAS28<br>Remission<br>( $<2.6$ ) | DAS28 Deep<br>Remission<br>( $<1.98$ ) | DAPSA<br>Remission<br>( $\leq 4$ ) |
|---------------------------------|----------------------------------|----------------------------------------|------------------------------------|
| <b>MDA</b>                      |                                  |                                        |                                    |
| Sensitivity                     | 70.7%                            | 82.1%                                  | 100.0%                             |
| Specificity                     | 92.3%                            | 85.7%                                  | 85.9%                              |
| Positive Predictive Value       | 82.1%                            | 60.4%                                  | 56.3%                              |
| Negative Predictive Value       | 86.4%                            | 94.7%                                  | 100.0%                             |
| Kappa agreement (K)             | 0.653                            | 0.598                                  | 0.652                              |
| <b>mMDA</b>                     |                                  |                                        |                                    |
| Sensitivity                     | 57.7%                            | 71.8%                                  | 87.0%                              |
| Specificity                     | 94.8%                            | 90.4%                                  | 89.9%                              |
| Positive Predictive Value       | 84.5%                            | 66.7%                                  | 61.0%                              |
| Negative Predictive Value       | 81.9%                            | 92.3%                                  | 97.5%                              |
| Kappa agreement (K)             | 0.570                            | 0.605                                  | 0.655                              |

Univariate analysis (Table 3A) showed that male gender ( $p = 0.031$ ) and lower age ( $p = 0.011$ ) were significantly associated with MDA achievement at 6 or 12 months of treatment. Furthermore, significant between-region differences were observed for MDA achievement at 6 or 12 months of treatment ( $p = 0.019$ ). Ontario and Quebec patients had the highest MDA rates

with 56.0% and 52.9%, respectively, while 36.4% and 14.3% of patients in Maritime and Western provinces reached MDA, respectively. In addition, significantly lower disease severity was observed at baseline among MDA achievers for the following disease parameters: MDGA ( $p<0.001$ ), PtGA ( $p<0.001$ ), pain ( $p<0.001$ ), HAQ ( $p<0.001$ ), SJC28 ( $p=0.001$ ), TJC28 ( $p<0.001$ ), and enthesitis count ( $p=0.013$ ). Multivariate logistic regression analysis (Table 3B) showed that lower baseline HAQ (OR=0.210,  $p<0.001$ ) and lower TJC28 (OR=0.880,  $p=0.006$ ) were significant prognostic factors of MDA achievement over 12 months of treatment, while parameters of lower enthesitis count (OR=0.838,  $p=0.069$ ) and GLM as the biologic agent (OR=2.228,  $p=0.073$ ) showed a trend towards statistical significance. Overall, similar results were obtained when assessing predictors of mMDA instead of MDA (data not shown).

**Table 3A. Univariate Analysis for MDA Achievement at 6 or 12 Months of Treatment**

| Parameters                                  | MDA achievement at 6 or 12 months |             | p-value <sup>c</sup> |
|---------------------------------------------|-----------------------------------|-------------|----------------------|
|                                             | Yes                               | No          |                      |
| <b>Province, n (%)</b>                      |                                   |             |                      |
| <i>Western</i>                              | 2 (14.3)                          | 12 (85.7)   | 0.019                |
| <i>Ontario</i>                              | 42 (56.0)                         | 33 (44.0)   |                      |
| <i>Quebec</i>                               | 27 (52.9)                         | 24 (47.1)   |                      |
| <i>Maritimes</i>                            | 8 (36.4)                          | 14 (63.6)   |                      |
| <b>Gender, n (%)</b>                        |                                   |             |                      |
| <i>Male</i>                                 | 45 (59.2)                         | 31 (40.8)   | 0.031                |
| <i>Female</i>                               | 28 (40.6)                         | 41 (59.4)   |                      |
| <b>Age, mean (SD)</b>                       | 46.6 (12.0)                       | 51.6 (10.7) | 0.011                |
| <b>MDGA (VAS cm)<sup>a</sup>, mean (SD)</b> | 4.3 (2.4)                         | 5.9 (2.0)   | <0.001               |
| <b>PtGA (VAS mm)<sup>a</sup>, mean (SD)</b> | 39.7 (24.7)                       | 56.8 (24.9) | <0.001               |
| <b>Pain (VAS mm)<sup>a</sup>, mean (SD)</b> | 35.6 (24.4)                       | 55.1 (23.2) | <0.001               |
| <b>HAQ<sup>a</sup>, mean (SD)</b>           | 0.7 (0.6)                         | 1.3 (0.6)   | <0.001               |
| <b>SJC28<sup>a</sup>, mean (SD)</b>         | 3.4 (3.8)                         | 5.4 (4.4)   | 0.001                |

|                                             |           |           |        |
|---------------------------------------------|-----------|-----------|--------|
| TJC28 <sup>a</sup> , mean (SD)              | 3.8 (4.1) | 8.8 (6.8) | <0.001 |
| Enthesitis count <sup>a,b</sup> , mean (SD) | 0.7 (1.4) | 2.0 (3.3) | 0.013  |
| <b>Baseline biologic agent</b>              |           |           |        |
| GLM                                         | 48 (53.9) | 41 (46.1) | 0.158  |
| IFX                                         | 31 (42.5) | 42 (57.5) |        |

<sup>a</sup>Denotes disease parameters at baseline.

<sup>b</sup>Among all patients (with and without enthesitis).

<sup>c</sup>P-value was assessed with chi-square for categorical variables or with non-parametric Mann-Whitney U test for continuous variables.

**Table 3B. Multivariate Analysis for MDA Achievement at 6 or 12 Months of Treatment**

| Parameters                           | Beta   | Odds Ratio | 95% Confidence Intervals |       | p-value |
|--------------------------------------|--------|------------|--------------------------|-------|---------|
|                                      |        |            | for Odds Ratio           |       |         |
|                                      |        |            | Lower                    | Upper |         |
| Baseline HAQ                         | -1.561 | 0.210      | 0.099                    | 0.447 | <0.001  |
| Baseline TJC28                       | -0.128 | 0.880      | 0.804                    | 0.964 | 0.006   |
| Baseline enthesitis count            | -0.177 | 0.838      | 0.692                    | 1.014 | 0.069   |
| Baseline biologic agent: GLM vs. IFX | 0.801  | 2.228      | 0.929                    | 5.343 | 0.073   |

Multivariate analysis was assessed with backward conditional logistic regression, covariates entered were: province, gender, age, baseline biologic agent, MDGA, PtGA, Pain, HAQ, SJC28, TJC28, and enthesitis count with probability for stepwise entry and removal at the 0.05 and 0.10 level, respectively.

Among the patients who achieved MDA at any time point, the highest proportion met all 7 MDA criteria with 45.8%, while 24.4% met 6/7 criteria, and 29.8% met 5/7 criteria (Figure 3A). The most commonly unmet criteria among these cases were patient-reported pain (with 25.2%), PtGA (with 15.3%), and PASI (with 12.2%) (Figure 3B). Additionally, among the 309 instances of non-MDA achievement, the proportion of cases that achieved near MDA was 16.5% (51/309). The most common reason for non-MDA in near-MDA cases was patient-reported pain (82.4%) followed by PtGA (68.6%), and HAQ (60.8%) (Figure 3C). Interestingly, 9 patients with available data that had reached MDA at 6 months were not in MDA state after 12 months. It was

1  
2  
3 determined that the most common criteria not met in this group were: PtGA (88.9%), enthesitis  
4  
5 count (66.7%), TJC (55.6%), and PASI (33.3%).  
6  
7  
8  
9

## 10 11 **DISCUSSION**

12  
13 The current analysis is the first community-based Canadian study presenting a 12 month follow  
14  
15 up of 223 prospectively followed patients with PsA from the BioTRAC registry. All measures of  
16  
17 disease activity in the current study showed a statistical improvement over time ( $p < 0.05$ ).  
18  
19

20  
21 Reported MDA achievement at 6 and 12 months of treatment was comparable with 43.5% and  
22  
23 44.8%, respectively. Among MDA achievers at 6 months, 75.7% ( $n=28/37$ ) had sustained MDA  
24  
25 at 12 months. The MDA achievement rate of approximately 45% is in line with the rates  
26  
27 reported by Mease et al. despite the randomized controlled setting of this study.[21] However,  
28  
29 our findings are lower in comparison with two recent studies which reported that 64% of the  
30  
31 study population achieved MDA after 12 months of treatment with anti TNF  $\alpha$  therapy [22,23].  
32  
33 A slightly higher proportion of patients (48.8%) achieved DAS28 remission at 12 months  
34  
35 compared to MDA, while the rates of mMDA (36.2%), DAS28 deep remission (28.6%) and  
36  
37 DAPSA remission (25.0%) were lower suggesting that the latter measures are more strict.  
38  
39 However, the MDA had substantial agreement with DAS28 and DAPSA remission, whereas  
40  
41 moderate agreement was observed with DAS28 deep remission. Thus, the current analysis  
42  
43 suggests that MDA criteria may be a more powerful and discriminatory method to assess PsA  
44  
45 than DAS28. The simplicity in calculating MDA and the lack of requirement for acute phase  
46  
47 reactants at the time of visit as compared to the DAS28, makes the MDA a more desirable and  
48  
49 practical tool to measure disease outcome in PsA.  
50  
51  
52  
53  
54  
55  
56  
57  
58  
59  
60

1  
2  
3 Adjusted analysis of baseline variables showed that lower HAQ, lower TJC28, lower enthesitis  
4 count, and GLM as the biologic agent were considered independent prognostic factors of MDA  
5 achievement over 12 months of treatment. In addition to HAQ [24,25], previous studies have  
6 also identified shorter symptom duration, greater general well-being (global visual analogue  
7 scale) [24], younger age, higher C-reactive protein (CRP), and lower BASFI as significant  
8 predictors of MDA, which however, were not confirmed in our study.[26] Moreover, other  
9 studies have shown that baseline lower HAQ, higher swollen joint count, and no previous use of  
10 anti TNF  $\alpha$  therapy are also prognostic factors of remission at 12 months of treatment.[27,28]

11  
12 The current results also showed that the most common limiting factors among patients who  
13 achieved MDA were including pain, PtGA, and PASI. Among patients who achieved near-MDA,  
14 the most commonly unmet criteria were pain, PtGA, and HAQ. These results highlight the  
15 difference in perception of disease activity by physicians and patients in the relative importance  
16 placed on specific disease aspects.

17  
18 All disease parameters showed a statistically significant improvement at 6 months of treatment  
19 and were sustained over the 12-month period. In a prospective cohort study by Saber *et al.*,  
20 statistically significant improvements in clinical outcome measures were also observed for  
21 TJC28, SJC28, CRP, and HAQ at 12 months in patients treated with anti TNF  $\alpha$  therapy  
22 (p<0.001 for all), wherein statistical improvement was achieved within the first 3 months of  
23 treatment.[27]

24  
25 The limitations of the current study are that the peripheral joint activity was measured using the  
26 28 tender/swollen joint count although the Outcome Measures in Rheumatology Clinical Trials  
27 (OMERACT) recommends the measure of 68 tender/66 swollen joint counts.[16] However,  
28 simplified joint counts have been shown to be sufficiently sensitive to measure clinical response  
29  
30  
31  
32  
33  
34  
35  
36  
37  
38  
39  
40  
41  
42  
43  
44  
45  
46  
47  
48  
49  
50  
51  
52  
53  
54  
55  
56  
57  
58  
59  
60

1  
2  
3 in PsA patients.[29] Furthermore, although several approaches were used to assess disease  
4 activity, radiographic images are not collected in BioTRAC, therefore not allowing the  
5 examination of radiographic progression. There is also potential bias given the observational  
6 nature of the study, a bias that is avoided when using data from clinical trials. In addition, a  
7 considerable number of patients did not have available MDA information at follow-up due to  
8 incomplete data, therefore there is risk for selection bias. In a drop-out analysis no statistical  
9 differences were observed between patients with and without MDA information, however, the  
10 latter had numerically higher TJC (8.0 vs 6.4) and enthesitis count (5.4 vs. 4.5). Furthermore,  
11 given that patients treated with either IFX or GLM were included and the profile of patients  
12 selected for each treatment may differ, there is risk for confounding by indication. However, the  
13 comparison of the two treatments was not within the scope of the current analysis and adjusted  
14 estimates were produced for MDA achievement. The strength of the study is that patients were  
15 seen in a real world setting by Canadian rheumatologists during routine clinical practice which  
16 enhances the generalizability of the results to the target population.  
17  
18  
19  
20  
21  
22  
23  
24  
25  
26  
27  
28  
29  
30  
31  
32  
33  
34  
35  
36

37 In conclusion, our results showed overall improvement in clinical parameters and disease activity  
38 in PsA patients treated with infliximab or golimumab during the 2 year follow up. By 6 and 12  
39 months of treatment almost 50% of patients achieved MDA, and among achievers of MDA the  
40 most commonly unmet criteria were patient-reported pain, PtGA, and PASI. Furthermore, lower  
41 baseline HAQ and lower TJC at baseline, were identified as significant prognostic factors of  
42 MDA achievement. This study provides evidence supporting the validity of MDA in real world  
43 and its usefulness in patient management under routine clinical care.  
44  
45  
46  
47  
48  
49  
50  
51  
52  
53  
54  
55  
56  
57  
58  
59  
60

1  
2  
3 **Acknowledgments:** Not applicable  
4  
5  
6

7 **Competing interests:**

8  
9 Dr. Rahman reports personal fees from Janssen Inc., during the conduct of the study; personal  
10 fees from Abbott, AbbVie, Amgen, BMS, Celgene, Novartis, Pfizer, Roche, outside the  
11 submitted work. Dr. Zummer, Dr. Chow and Dr. Kapur report personal fees from Janssen Inc.,  
12 during the conduct of the study. Dr. Bessette reports personal fees from Janssen Inc., during the  
13 conduct of the study; personal fees from Amgen, BMS, Roche, UCB, AbbVie, Pfizer, Merck,  
14 Sanofi, Celgene, Lilly, Novartis, outside the submitted work. Dr. Baer reports personal fees from  
15 Janssen Inc., during the conduct of the study; personal fees from AbbVie, Amgen, BMS, Pfizer,  
16 Roche, outside the submitted work. Dr. Haraoui reports personal fees from Janssen Inc., during  
17 the conduct of the study; personal fees from AbbVie, Amgen, BMS, Celgene, Pfizer, Roche,  
18 UCB, outside the submitted work. Dr. Kelsall reports personal fees from Janssen Inc., during the  
19 conduct of the study; personal fees from Abbott, AstraZeneca, BMS, Merck-Schering, Lilly,  
20 Pfizer, Wyeth, Roche, Takeda, UCB, outside the submitted work. Dr. Rampakakis and Ms.  
21 Psaradellis report personal fees from Janssen Inc. as employees of JSS Medical Research Inc.,  
22 the CRO hired, during the conduct of the study. Dr. Lehman, Dr. Nantel, Dr. Osborne and Dr.  
23 Tkaczyk report personal fees as employees of Janssen Inc., during the conduct of the study.  
24  
25  
26  
27  
28  
29  
30  
31  
32  
33  
34  
35  
36

37 **Funding:** This work was supported by Janssen Inc.  
38  
39  
40

41 **Contributorship statement:**

42 Dr. Rahman, Dr. Zummer, Dr. Bessette, Dr. Baer, Dr. Haraoui, Dr. Chow, Dr. Kelsall and Dr.  
43 Kapur substantially contributed to the acquisition of the data for the work and revised the  
44 manuscript for important intellectual property. Dr. Rampakakis, Dr. Lehman, Dr. Nantel, Dr.  
45 Osborne and Dr. Tkaczyk substantially contributed to the conception or design of the work and  
46 the interpretation of the data for the work, and revised the manuscript critically for important  
47 intellectual content. Ms. Psaradellis substantially contributed to the analysis and interpretation of  
48 data for the work and drafted the manuscript. All authors approved the version to be published  
49 and agreed to be accountable for all aspects of the work in ensuring that questions related to the  
50 accuracy or integrity of any part of the work were appropriately investigated and resolved.  
51  
52  
53  
54  
55  
56  
57  
58  
59  
60

1  
2  
3  
4  
5 **Role of study sponsor:** The sponsor, Janssen Inc., participated in the study design and  
6 interpretation of the data and funded all aspects of the study, but did not have an impact on data  
7 collection or the decision to submit the article for publication. The writing was conducted by a  
8 third party and the sponsor critically reviewed the manuscript.  
9  
10

11  
12  
13  
14 **Independence:** The study researchers were independent from funders.  
15

16  
17  
18 **Access to data:** All authors, external and internal, had full access to all of the data (including  
19 statistical reports and tables) in the study and can take responsibility for the integrity of the data  
20 and the accuracy of the data analysis.  
21  
22

23  
24  
25 **Transparency declaration:** The lead author affirms that the manuscript is an honest, accurate,  
26 and transparent account of the study being reported; no important aspects of the study have been  
27 omitted; any discrepancies from the study as planned have been explained.  
28  
29

30  
31  
32 **Data sharing:** No additional data available.  
33

34  
35 **Checklist:** The criteria described in the STROBE guidelines (checklist) have been satisfied.  
36  
37

38  
39 **What this paper adds:**

40  
41 **What is already known on this subject:**

- 42 • The control of disease activity adopting the treat-to-target strategy or minimal disease  
43 activity (MDA) has not been carefully established and is becoming the current challenge  
44 in management of PSA.  
45
- 46 • As far as we know, there is no real-world evidence data on MDA available in the  
47 literature and our study will address this need.  
48  
49  
50  
51

52  
53 **What this study adds:**

- 54 • The results of the current study showed that almost 50% of patients achieved MDA  
55 within the first year of treatment and thus provides evidence supporting the validity of  
56  
57  
58  
59  
60



1  
2  
3 MDA in Canadian real-world and its usefulness in patient management under routine  
4 clinical care.  
5  
6  
7  
8  
9  
10  
11  
12  
13  
14  
15  
16  
17  
18  
19  
20  
21  
22  
23  
24  
25  
26  
27  
28  
29  
30  
31  
32  
33  
34  
35  
36  
37  
38  
39  
40  
41  
42  
43  
44  
45  
46  
47  
48  
49  
50  
51  
52  
53  
54  
55  
56  
57  
58  
59  
60

For peer review only

## REFERENCE LIST

## References

- 1 Sonoda KH, Inaba S, Ariyama A, et al. Therapeutic neutrophil apheresis in patients with ocular Behcet disease. *Arch Ophthalmol* 2005;123(2):267-269.
- 2 Khraishi M, Chouela E, Bejar M, et al. High prevalence of psoriatic arthritis in a cohort of patients with psoriasis seen in a dermatology practice. *J Cutan Med Surg* 2012;16(2):122-127.
- 3 Kane D, Stafford L, Bresnihan B, et al. A prospective, clinical and radiological study of early psoriatic arthritis: an early synovitis clinic experience. *Rheumatology (Oxford)* 2003;42(12):1460-1468.
- 4 McHugh NJ, Balachrishnan C, Jones SM. Progression of peripheral joint disease in psoriatic arthritis: a 5-yr prospective study. *Rheumatology (Oxford)* 2003;42(6):778-783.
- 5 Gladman DD, Stafford-Brady F, Chang CH, et al. Longitudinal study of clinical and radiological progression in psoriatic arthritis. *J Rheumatol* 1990;17(6):809-812.
- 6 Wong K, Gladman DD, Husted J, et al. Mortality studies in psoriatic arthritis: results from a single outpatient clinic. I. Causes and risk of death. *Arthritis Rheum* 1997;40(10):1868-1872.
- 7 Husted JA, Gladman DD, Farewell VT, et al. Health-related quality of life of patients with psoriatic arthritis: a comparison with patients with rheumatoid arthritis. *Arthritis Rheum* 2001;45(2):151-158.
- 8 Husted JA, Tom BD, Farewell VT, et al. A longitudinal study of the effect of disease activity and clinical damage on physical function over the course of psoriatic arthritis: Does the effect change over time? *Arthritis Rheum* 2007;56(3):840-849.
- 9 Gladman DD, Antoni C, Mease P, et al. Psoriatic arthritis: epidemiology, clinical features, course, and outcome. *Ann Rheum Dis* 2005;64 Suppl 2:ii14-17.
- 10 Yu AP, Tang J, Xie J, et al. Economic burden of psoriasis compared to the general population and stratified by disease severity. *Curr Med Res Opin* 2009;25(10):2429-2438.
- 11 Schoels M, Knevel R, Aletaha D, et al. Evidence for treating rheumatoid arthritis to target: results of a systematic literature search. *Ann Rheum Dis* 2010;69(4):638-643.
- 12 National Institute for Health and Clinical Excellence. The management of rheumatoid arthritis in adults. 2009. <http://www.nice.org.uk/guidance/cg79> (accessed 28 Mar 2016).
- 13 Gladman DD, Mease PJ, Ritchlin CT, et al. Adalimumab for long-term treatment of psoriatic arthritis: forty-eight week data from the adalimumab effectiveness in psoriatic arthritis trial. *Arthritis Rheum* 2007;56(2):476-488.
- 14 Mease PJ, Kivitz AJ, Burch FX, et al. Etanercept treatment of psoriatic arthritis: safety, efficacy, and effect on disease progression. *Arthritis Rheum* 2004;50(7):2264-2272.
- 15 van der Heijde D, Kavanaugh A, Gladman DD, et al. Infliximab inhibits progression of radiographic damage in patients with active psoriatic arthritis through one year of treatment: Results from the induction and maintenance psoriatic arthritis clinical trial 2. *Arthritis Rheum* 2007;56(8):2698-2707.
- 16 Coates LC, Fransen J, Helliwell PS. Defining minimal disease activity in psoriatic arthritis: a proposed objective target for treatment. *Ann Rheum Dis* 2010;69(1):48-53.
- 17 Coates LC, Cook R, Lee KA, et al. Frequency, predictors, and prognosis of sustained minimal disease activity in an observational psoriatic arthritis cohort. *Arthritis Care Res (Hoboken)* 2010;62(7):970-976.

- 1  
2  
3  
4  
5  
6  
7  
8  
9  
10  
11  
12  
13  
14  
15  
16  
17  
18  
19  
20  
21  
22  
23  
24  
25  
26  
27  
28  
29  
30  
31  
32  
33  
34  
35  
36  
37  
38  
39  
40  
41  
42  
43  
44  
45  
46  
47  
48  
49  
50  
51  
52  
53  
54  
55  
56  
57  
58  
59  
60
- 18 Coates LC, Helliwell PS. Validation of minimal disease activity criteria for psoriatic arthritis using interventional trial data. *Arthritis Care Res (Hoboken)* 2010;62(7):965-969.
- 19 Coates LC, Moverley AR, McParland L, et al. Effect of tight control of inflammation in early psoriatic arthritis (TICOPA): a UK multicentre, open-label, randomised controlled trial. *Lancet* 2015;386(10012):2489-2498.
- 20 Thorne C, Bensen WG, Choquette D, et al. Effectiveness and safety of infliximab in rheumatoid arthritis: analysis from a canadian multicenter prospective observational registry. *Arthritis Care Res (Hoboken)* 2014;66(8):1142-1151.
- 21 Mease PJ, Heckaman M, Kary S, et al. Application and modifications of minimal disease activity measures for patients with psoriatic arthritis treated with adalimumab: subanalyses of ADEPT. *J Rheumatol* 2013;40(5):647-652.
- 22 Haddad A, Thavaneswaran A, Ruiz-Arruza I, et al. Minimal disease activity and anti-tumor necrosis factor therapy in psoriatic arthritis. *Arthritis Care Res (Hoboken)* 2015;67(6):842-847.
- 23 Lubrano E, Perrotta FM, Parsons WJ, et al. Patient's Global Assessment as an Outcome Measure for Psoriatic Arthritis in Clinical Practice: A Surrogate for Measuring Low Disease Activity? *J Rheumatol* 2015.
- 24 Theander E, Husmark T, Alenius GM, et al. Early psoriatic arthritis: short symptom duration, male gender and preserved physical functioning at presentation predict favourable outcome at 5-year follow-up. Results from the Swedish Early Psoriatic Arthritis Register (SwePsA). *Ann Rheum Dis* 2014;73(2):407-413.
- 25 Kavanaugh A, van der Heijde D, Beutler A, et al. Patients with psoriatic arthritis who achieve minimal disease activity in response to golimumab therapy demonstrate less radiographic progression: Results through 5 years of the randomized, placebo-controlled, GO-REVEAL study. *Arthritis Care Res (Hoboken)* 2015.
- 26 Iervolino S, Di Minno MN, Peluso R, et al. Predictors of early minimal disease activity in patients with psoriatic arthritis treated with tumor necrosis factor-alpha blockers. *J Rheumatol* 2012;39(3):568-573.
- 27 Saber TP, Ng CT, Renard G, et al. Remission in psoriatic arthritis: is it possible and how can it be predicted? *Arthritis Res Ther* 2010;12(3):R94.
- 28 Eder L, Chandran V, Schentag CT, et al. Time and predictors of response to tumour necrosis factor-alpha blockers in psoriatic arthritis: an analysis of a longitudinal observational cohort. *Rheumatology (Oxford)* 2010;49(7):1361-1366.
- 29 Englbrecht M, Wang Y, Ronneberger M, et al. Measuring joint involvement in polyarticular psoriatic arthritis: an introduction of alternatives. *Arthritis Care Res (Hoboken)* 2010;62(7):977-983.

**FIGURE LEGENDS**

Figure 1. Flow Chart of the Patient Population over Time

Legend: not applicable

Figure 2. MDA Achievement, mMDA Achievement, DAS28 Remission, DAS28 Deep Remission, and DAPSA Remission over Time

■ Baseline   ■ 6 months   ■ 12 months

Figure 3A. Proportion of Met Criteria among MDA Achievers

■ 5/7 Criteria

■ 6/7 Criteria

■ 7/7 Criteria

Figure 3B. Proportion of Unmet Disease Criteria among MDA Achievers

Legend: not applicable

Figure 3C: Proportion of Umet Criteria among New MDA Achievers

Legend: not applicable

Supplementary Figure 1: Improvement in Disease Parameters at 6 and 12 Months

■ 6 months

■ 12 months



Flow chart of the patient population over time

90x72mm (600 x 600 DPI)

For peer review only

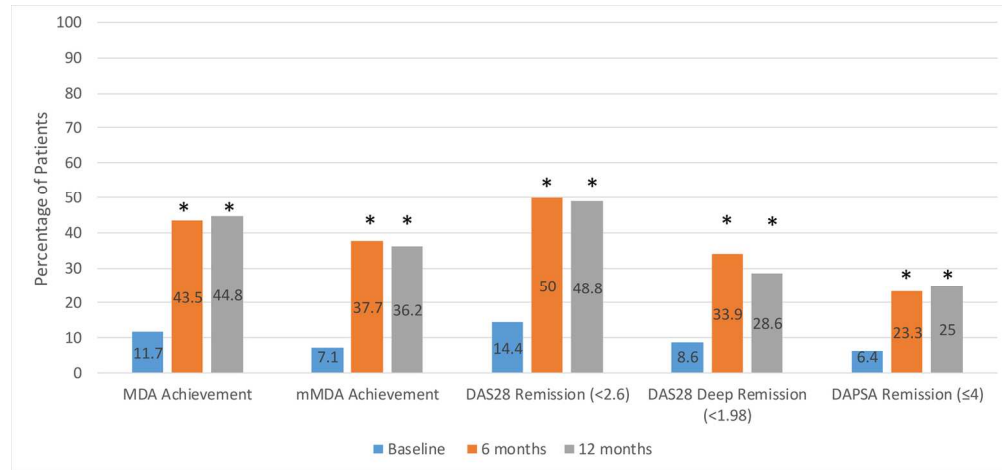

Figure 2. MDA Achievement, mMDA Achievement, DAS28 Remission, DAS28 Deep Remission, and DAPSA Remission over Time

\*The improvement in MDA achievement, mMDA achievement, DAS28 remission, DAS28 deep remission and DAPSA remission from baseline to 6 months and from baseline to 12 months was assessed with the McNemar Test ( $p < 0.001$  for all, except DAS28 deep remission at 12 months  $p = 0.019$ ; and DAPSA remission at 12 months  $p = 0.006$ ).

75x35mm (600 x 600 DPI)

1  
2  
3  
4  
5  
6  
7  
8  
9  
10  
11  
12  
13  
14  
15  
16  
17  
18  
19  
20  
21  
22  
23  
24  
25  
26  
27  
28  
29  
30  
31  
32  
33  
34  
35  
36  
37  
38  
39  
40  
41  
42  
43  
44  
45  
46  
47  
48  
49  
50  
51  
52  
53  
54  
55  
56  
57  
58  
59  
60



Proportion of Met Criteria among MDA Achievers

134x155mm (600 x 600 DPI)

1  
2  
3  
4  
5  
6  
7  
8  
9  
10  
11  
12  
13  
14  
15  
16  
17  
18  
19  
20  
21  
22  
23  
24  
25  
26  
27  
28  
29  
30  
31  
32  
33  
34  
35  
36  
37  
38  
39  
40  
41  
42  
43  
44  
45  
46  
47  
48  
49  
50  
51  
52  
53  
54  
55  
56  
57  
58  
59  
60



Proportion of Unmet Disease Criteria among MDA Achievers

118x93mm (600 x 600 DPI)

For review only



1  
2  
3  
4  
5  
6  
7  
8  
9  
10  
11  
12  
13  
14  
15  
16  
17  
18  
19  
20  
21  
22  
23  
24  
25  
26  
27  
28  
29  
30  
31  
32  
33  
34  
35  
36  
37  
38  
39  
40  
41  
42  
43  
44  
45  
46  
47  
48  
49  
50  
51  
52  
53  
54  
55  
56  
57  
58  
59  
60

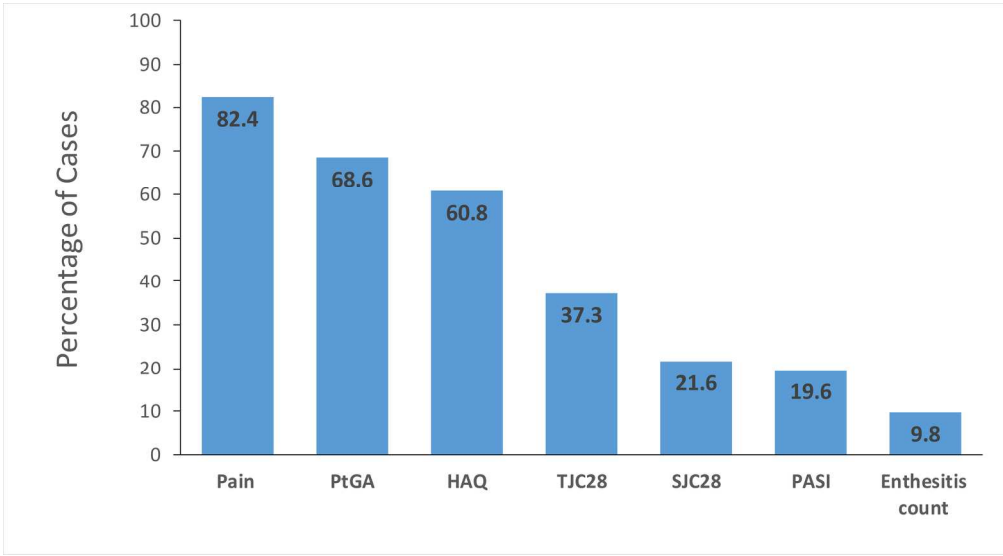

Proportion of Unmet Criteria among New MDA Achievers

99x54mm (600 x 600 DPI)

review only

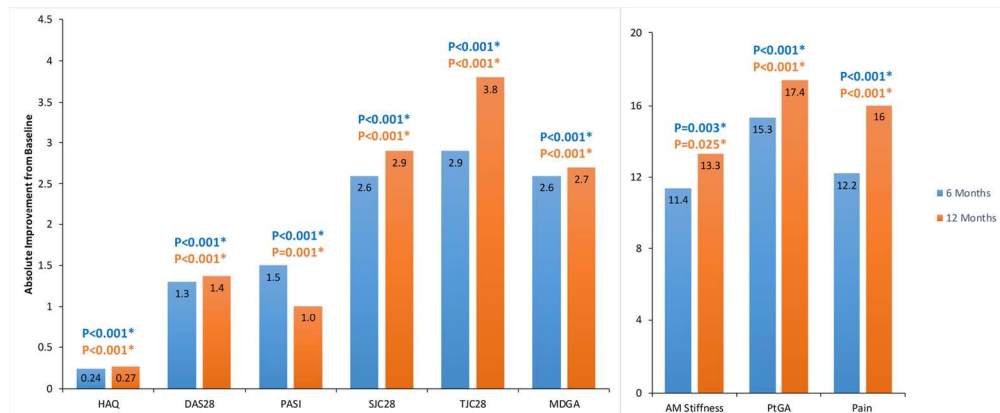

Improvement in Disease Parameters at 6 and 12 Months

71x29mm (600 x 600 DPI)

Peer review only

1  
2  
3  
4  
5  
6  
7  
8  
9  
10  
11  
12  
13  
14  
15  
16  
17  
18  
19  
20  
21  
22  
23  
24  
25  
26  
27  
28  
29  
30  
31  
32  
33  
34  
35  
36  
37  
38  
39  
40  
41  
42  
43  
44  
45  
46  
47  
48  
49  
50  
51  
52  
53  
54  
55  
56  
57  
58  
59  
60

## STROBE Statement—checklist of items that should be included in reports of observational studies

|                              | Item No | Recommendation                                                                                                                                                                                                                                                                                                                                                                                                                                                                                                                                                                                                                                                                                   | Page No.                      |
|------------------------------|---------|--------------------------------------------------------------------------------------------------------------------------------------------------------------------------------------------------------------------------------------------------------------------------------------------------------------------------------------------------------------------------------------------------------------------------------------------------------------------------------------------------------------------------------------------------------------------------------------------------------------------------------------------------------------------------------------------------|-------------------------------|
| <b>Title and abstract</b>    | 1       | (a) Indicate the study's design with a commonly used term in the title or the abstract<br>(b) Provide in the abstract an informative and balanced summary of what was done and what was found                                                                                                                                                                                                                                                                                                                                                                                                                                                                                                    | 1<br>3-4                      |
| <b>Introduction</b>          |         |                                                                                                                                                                                                                                                                                                                                                                                                                                                                                                                                                                                                                                                                                                  |                               |
| Background/rationale         | 2       | Explain the scientific background and rationale for the investigation being reported                                                                                                                                                                                                                                                                                                                                                                                                                                                                                                                                                                                                             | 5-6                           |
| Objectives                   | 3       | State specific objectives, including any prespecified hypotheses                                                                                                                                                                                                                                                                                                                                                                                                                                                                                                                                                                                                                                 | 6-7                           |
| <b>Methods</b>               |         |                                                                                                                                                                                                                                                                                                                                                                                                                                                                                                                                                                                                                                                                                                  |                               |
| Study design                 | 4       | Present key elements of study design early in the paper                                                                                                                                                                                                                                                                                                                                                                                                                                                                                                                                                                                                                                          | 7                             |
| Setting                      | 5       | Describe the setting, locations, and relevant dates, including periods of recruitment, exposure, follow-up, and data collection                                                                                                                                                                                                                                                                                                                                                                                                                                                                                                                                                                  | 7-8                           |
| Participants                 | 6       | (a) <i>Cohort study</i> —Give the eligibility criteria, and the sources and methods of selection of participants. Describe methods of follow-up<br><i>Case-control study</i> —Give the eligibility criteria, and the sources and methods of case ascertainment and control selection. Give the rationale for the choice of cases and controls<br><i>Cross-sectional study</i> —Give the eligibility criteria, and the sources and methods of selection of participants<br>(b) <i>Cohort study</i> —For matched studies, give matching criteria and number of exposed and unexposed<br><i>Case-control study</i> —For matched studies, give matching criteria and the number of controls per case | 7-8                           |
| Variables                    | 7       | Clearly define all outcomes, exposures, predictors, potential confounders, and effect modifiers. Give diagnostic criteria, if applicable                                                                                                                                                                                                                                                                                                                                                                                                                                                                                                                                                         | 8                             |
| Data sources/<br>measurement | 8*      | For each variable of interest, give sources of data and details of methods of assessment (measurement). Describe comparability of assessment methods if there is more than one group                                                                                                                                                                                                                                                                                                                                                                                                                                                                                                             | 8                             |
| Bias                         | 9       | Describe any efforts to address potential sources of bias                                                                                                                                                                                                                                                                                                                                                                                                                                                                                                                                                                                                                                        | 7                             |
| Study size                   | 10      | Explain how the study size was arrived at                                                                                                                                                                                                                                                                                                                                                                                                                                                                                                                                                                                                                                                        | 7                             |
| Quantitative variables       | 11      | Explain how quantitative variables were handled in the analyses. If applicable, describe which groupings were chosen and why                                                                                                                                                                                                                                                                                                                                                                                                                                                                                                                                                                     | 8-9                           |
| Statistical methods          | 12      | (a) Describe all statistical methods, including those used to control for confounding<br>(b) Describe any methods used to examine subgroups and interactions<br>(c) Explain how missing data were addressed<br>(d) <i>Cohort study</i> —If applicable, explain how loss to follow-up was addressed<br><i>Case-control study</i> —If applicable, explain how matching of cases and controls was addressed<br><i>Cross-sectional study</i> —If applicable, describe analytical methods taking account of sampling strategy<br>(e) Describe any sensitivity analyses                                                                                                                                | 8-9<br>N/A<br>9<br>N/A<br>N/A |

Continued on next page

1  
2  
3  
4  
5  
6  
7  
8  
9  
10  
11  
12  
13  
14  
15  
16  
17  
18  
19  
20  
21  
22  
23  
24  
25  
26  
27  
28  
29  
30  
31  
32  
33  
34  
35  
36  
37  
38  
39  
40  
41  
42  
43  
44  
45  
46  
47  
48  
49  
50  
51  
52  
53  
54  
55  
56  
57  
58  
59  
60**Results**

|                          |     |                                                                                                                                                                                                                                                                                                                                                                                                               |                                  |
|--------------------------|-----|---------------------------------------------------------------------------------------------------------------------------------------------------------------------------------------------------------------------------------------------------------------------------------------------------------------------------------------------------------------------------------------------------------------|----------------------------------|
| Participants             | 13* | (a) Report numbers of individuals at each stage of study—eg numbers potentially eligible, examined for eligibility, confirmed eligible, included in the study, completing follow-up, and analysed<br>(b) Give reasons for non-participation at each stage<br>(c) Consider use of a flow diagram                                                                                                               | Page 9 & Fig.1<br>Fig.1<br>Fig.1 |
| Descriptive data         | 14* | (a) Give characteristics of study participants (eg demographic, clinical, social) and information on exposures and potential confounders<br>(b) Indicate number of participants with missing data for each variable of interest<br>(c) <i>Cohort study</i> —Summarise follow-up time (eg, average and total amount)                                                                                           | 9<br>8-9<br>11                   |
| Outcome data             | 15* | <i>Cohort study</i> —Report numbers of outcome events or summary measures over time<br><i>Case-control study</i> —Report numbers in each exposure category, or summary measures of exposure<br><i>Cross-sectional study</i> —Report numbers of outcome events or summary measures                                                                                                                             | 11<br>11                         |
| Main results             | 16  | (a) Give unadjusted estimates and, if applicable, confounder-adjusted estimates and their precision (eg, 95% confidence interval). Make clear which confounders were adjusted for and why they were included<br>(b) Report category boundaries when continuous variables were categorized<br>(c) If relevant, consider translating estimates of relative risk into absolute risk for a meaningful time period | 9-13<br>13<br>N/A                |
| Other analyses           | 17  | Report other analyses done—eg analyses of subgroups and interactions, and sensitivity analyses                                                                                                                                                                                                                                                                                                                | N/A                              |
| <b>Discussion</b>        |     |                                                                                                                                                                                                                                                                                                                                                                                                               |                                  |
| Key results              | 18  | Summarise key results with reference to study objectives                                                                                                                                                                                                                                                                                                                                                      | 14-16                            |
| Limitations              | 19  | Discuss limitations of the study, taking into account sources of potential bias or imprecision. Discuss both direction and magnitude of any potential bias                                                                                                                                                                                                                                                    | 15-16                            |
| Interpretation           | 20  | Give a cautious overall interpretation of results considering objectives, limitations, multiplicity of analyses, results from similar studies, and other relevant evidence                                                                                                                                                                                                                                    | 14-16                            |
| Generalisability         | 21  | Discuss the generalisability (external validity) of the study results                                                                                                                                                                                                                                                                                                                                         | 16                               |
| <b>Other information</b> |     |                                                                                                                                                                                                                                                                                                                                                                                                               |                                  |
| Funding                  | 22  | Give the source of funding and the role of the funders for the present study and, if applicable, for the original study on which the present article is based                                                                                                                                                                                                                                                 | 18-19                            |

\*Give information separately for cases and controls in case-control studies and, if applicable, for exposed and unexposed groups in cohort and cross-sectional studies.

**Note:** An Explanation and Elaboration article discusses each checklist item and gives methodological background and published examples of transparent reporting. The STROBE checklist is best used in conjunction with this article (freely available on the Web sites of PLoS Medicine at <http://www.plosmedicine.org/>, Annals of Internal Medicine at <http://www.annals.org/>, and Epidemiology at <http://www.epidem.com/>). Information on the STROBE Initiative is available at [www.strobe-statement.org](http://www.strobe-statement.org).
